# Supplementary material
Source: publisher figshare collection journal article supplement (https://gsajournals.figshare.com/articles/dataset/_/7361240)
Supplement: Supplementary file 1 [file 2]

## Sheet: atp6
Strain	288	297	345	351	397	400	529	531	543	573	605	648	678	684	693	702	708	714	717	720	721	722	723	729	732	733	734	738	753	763	766	ens2 group	full-length ENS2 ORF	ENS2 orf size	± Oli ratio
more Ens2 sensitive sequence																		C	T	G	G	G	A	C->G	G	G	C	T
Sc ATP6 Group 1
S288c (reference)	0	0	0	0	0	0	0	0	0	0	0	0	0	0	0	0	0	C	T	G	G	G	A	C	G	G	C	T	T	G	G				1.45968
S288C AA	F96	I99	I115	Y117	I133	V134	F177	F177	I181	I191	A202	L216	I226	A228	M231	F234	I236	I238	I239	Q240	G241	G241	G241	V243	W244	A245	A245	I246	Y251	A255	V256
yjm1307	0	0	0	0	0	0	0	0	0	0	0	0	0	0	0	0	0	0	0	0	0	0	0	0	0	0	0	0	0	0	0				1.12926
yjm1381	0	0	0	C->T	0	0	T->A(N)	C->T(N)	0	0	C->G(N)	A->C(N)	0	0	0	0	0	0	0	0	0	0	0	0	0	0	0	0	0	0	0				1.31637
yjm1388	0	0	0	0	0	0	T->A(N)	C->T(N)	0	0	C->G(N)	A->C(N)	0	0	0	0	0	0	0	0	0	0	0	0	0	0	0	0	0	0	0				1.42389
yjm1389	0	0	0	0	0	0	T->A(N)	C->T(N)	0	0	C->G(N)	A->C(N)	0	0	0	0	0	0	0	0	0	0	0	0	0	0	0	0	0	0	0				1.38318
yjm1418	0	0	0	0	A->G(N)	0	T->A(N)	C->T(N)	0	0	C->G(N)	A->C(N)	0	0	0	0	0	0	0	0	0	0	0	0	0	0	0	0	0	0	0				1.36374
yjm1419	0	0	0	0	0	0	T->A(N)	C->T(N)	0	0	C->G(N)	A->C(N)	0	0	0	0	0	0	0	0	0	0	0	0	0	0	0	0	0	0	0				1.36952
yjm1447	0	0	0	0	0	0	T->A(N)	C->T(N)	0	0	C->G(N)	A->C(N)	0	0	0	0	0	0	0	0	0	0	A->T	C->A	0	0	0	0	0	0	0				1.47957
yjm1549	0	0	0	C->T	0	0	T->A(N)	C->T(N)	0	0	C->G(N)	A->C(N)	0	0	0	0	0	0	0	0	0	0	0	0	0	0	0	0	0	0	0				1.27864
yjm1592	0	0	0	0	0	0	T->A(N)	C->T(N)	0	0	C->G(N)	A->C(N)	0	0	0	0	0	0	0	0	0	0	0	0	0	0	0	0	0	0	0				1.26726
yjm195	0	0	0	C->T	0	0	T->A(N)	C->T(N)	0	0	C->G(N)	A->C(N)	0	0	0	0	0	0	0	0	0	0	0	0	0	0	0	0	0	0	0				1.44432
less Ens2 sensitive sequence																		T	C	A	T	C	T	T	A	C	T	C
Sc ATP6 Group 2
SK1	0	0	0	0	0	0	0	0	0	0	0	0	0	C->T	G->T(N)	0	T->C	C->T	T->C	G->A	G->T(N)	G->C(N)	A->T(N)	C->T	G->A	G->C(N)	C->T(N)	T->C	0	0	0				1.25226
yjm1129	0	0	T->C	0	0	0	0	0	0	0	0	0	0	C->T	G->T(N)	0	0	C->T	T->C	G->A	G->T(N)	G->C(N)	A->T(N)	C->T	G->A	G->C(N)	C->T(N)	T->C	0	0	0				0.970333
yjm1248	0	0	0	0	0	0	0	0	0	0	0	0	0	C->T	G->T(N)	0	T->C	C->T	T->C	G->A	G->T(N)	G->C(N)	A->T(N)	C->T	G->A	G->C(N)	C->T(N)	T->C	0	0	0				1.25721
yjm1386	0	0	T->C	0	0	0	0	0	0	0	0	0	0	C->T	G->T(N)	0	0	C->T	T->C	G->A	G->T(N)	G->C(N)	A->T(N)	C->T	G->A	G->C(N)	C->T(N)	T->C	0	0	0				1.34216
yjm1415	0	0	T->C	0	0	0	0	0	0	0	0	0	0	C->T	G->T(N)	0	0	C->T	T->C	G->A	G->T(N)	G->C(N)	A->T(N)	C->T	G->A	G->C(N)	C->T(N)	T->C	0	0	0				0.772496
yjm1439	0	0	0	0	0	0	0	0	0	0	0	0	0	C->T	G->T(N)	0	T->C	C->T	T->C	G->A	G->T(N)	G->C(N)	A->T(N)	C->T	G->A	G->C(N)	C->T(N)	T->C	0	0	0				1.18496
yjm1526	0	0	T->C	0	0	0	0	0	0	0	0	0	0	C->T	G->T(N)	0	0	C->T	T->C	G->A	G->T(N)	G->C(N)	A->T(N)	C->T	G->A	G->C(N)	C->T(N)	T->C	0	0	0				0.930326
yjm1574	0	0	T->C	0	0	0	0	0	0	0	0	0	0	C->T	G->T(N)	0	0	C->T	T->C	G->A	G->T(N)	G->C(N)	A->T(N)	C->T	G->A	G->C(N)	C->T(N)	T->C	0	0	0				1.45103
yjm969	0	0	T->C	0	0	0	0	0	0	0	0	0	0	C->T	G->T(N)	0	0	C->T	T->C	G->A	G->T(N)	G->C(N)	A->T(N)	C->T	G->A	G->C(N)	C->T(N)	T->C	0	0	0				1.06458
yjm972	0	0	T->C	0	0	0	0	0	0	0	0	0	0	C->T	G->T(N)	0	0	C->T	T->C	G->A	G->T(N)	G->C(N)	A->T(N)	C->T	G->A	G->C(N)	C->T(N)	T->C	0	0	0				0.823494
yjm975	0	0	T->C	0	0	0	0	0	0	0	0	0	0	C->T	G->T(N)	0	0	C->T	T->C	G->A	G->T(N)	G->C(N)	A->T(N)	C->T	G->A	G->C(N)	C->T(N)	T->C	0	0	0				0.908061
yjm978	0	0	T->C	0	0	0	0	0	0	0	0	0	0	C->T	G->T(N)	0	0	C->T	T->C	G->A	G->T(N)	G->C(N)	A->T(N)	C->T	G->A	G->C(N)	C->T(N)	T->C	0	0	0				0.927193
yjm981	0	0	T->C	0	0	0	0	0	0	0	0	0	0	C->T	G->T(N)	0	0	C->T	T->C	G->A	G->T(N)	G->C(N)	A->T(N)	C->T	G->A	G->C(N)	C->T(N)	T->C	0	0	0				0.885755
yjm984	0	0	T->C	0	0	0	0	0	0	0	0	0	0	C->T	G->T(N)	0	0	C->T	T->C	G->A	G->T(N)	G->C(N)	A->T(N)	C->T	G->A	G->C(N)	C->T(N)	T->C	0	0	0				0.913381
yjm987	0	0	T->C	0	0	0	0	0	0	0	0	0	0	C->T	G->T(N)	0	0	C->T	T->C	G->A	G->T(N)	G->C(N)	A->T(N)	C->T	G->A	G->C(N)	C->T(N)	T->C	0	0	0				0.882372
yjm990	0	0	T->C	0	0	0	0	0	0	0	0	0	0	C->T	G->T(N)	0	0	C->T	T->C	G->A	G->T(N)	G->C(N)	A->T(N)	C->T	G->A	G->C(N)	C->T(N)	T->C	0	0	0				0.950557
yjm993	0	0	T->C	0	0	0	0	0	0	0	0	0	0	C->T	G->T(N)	0	0	C->T	T->C	G->A	G->T(N)	G->C(N)	A->T(N)	C->T	G->A	G->C(N)	C->T(N)	T->C	0	0	0				0.882911
yjm996	0	0	T->C	0	0	0	0	0	0	0	0	0	0	C->T	G->T(N)	0	0	C->T	T->C	G->A	G->T(N)	G->C(N)	A->T(N)	C->T	G->A	G->C(N)	C->T(N)	T->C	0	0	0				0.745234
Sc ATP6 Group 3
yjm1401	0	0	0	0	0	0	0	0	T->C	0	C->G(N)	0	0	C->T	G->T(N)	0	0	C->T	T->C	G->A	0	G->C(N)	A->C(N)	C->T	G->A	G->C(N)	C->T(N)	T->C	0	0	0				1.05234
yjm1450	0	0	0	0	0	0	0	0	T->C	0	C->G(N)	0	0	C->T	G->T(N)	0	0	C->T	T->C	G->A	0	G->C(N)	A->C(N)	C->T	G->A	G->C(N)	C->T(N)	T->C	0	0	0				1.31521
yjm1460	0	0	0	0	0	0	0	0	T->C	0	C->G(N)	0	0	C->T	G->T(N)	0	0	C->T	T->C	G->A	0	G->C(N)	A->C(N)	C->T	G->A	G->C(N)	C->T(N)	T->C	0	0	0				1.00343
yjm270	0	0	0	0	0	0	0	0	0	0	0	0	0	C->T	G->T(N)	0	0	C->T	T->C	G->A	0	G->C(N)	A->T(N)	C->T	G->A	G->C(N)	C->T(N)	T->C	0	0	0				1.48657
yjm470	0	0	0	0	0	0	0	0	T->C	0	C->G(N)	0	0	C->T	G->T(N)	0	0	C->T	T->C	G->A	0	G->C(N)	A->C(N)	C->T	G->A	G->C(N)	C->T(N)	T->C	0	0	0				5.03974
Sc ATP6 Group 4
yjm1078	0	0	T->C	0	0	0	0	0	0	0	0	0	0	C->T	G->T(N)	0	0	C->T	T->C	G->A	G->T(N)	G->C(N)	A->T(N)	C->T	G->A	G->C(N)	C->T(N)	T->C	T->C	G->A(N)	G->T(N)	A	yes	476	0.284325
yjm1242	0	0	T->C	0	0	0	0	0	0	0	0	0	C->T	C->T	G->T(N)	0	0	C->T	T->C	G->A	G->T(N)	G->C(N)	A->T(N)	C->T	G->A	G->C(N)	C->T(N)	T->C	T->C	G->A(N)	G->T(N)	A	yes	476	0
yjm1252	0	0	T->C	0	0	0	0	0	0	0	0	0	0	C->T	G->T(N)	0	0	C->T	T->C	G->A	G->T(N)	G->C(N)	A->T(N)	C->T	G->A	G->C(N)	C->T(N)	T->C	T->C	G->A(N)	G->T(N)	A	yes	476	1.09745
yjm1342	0	0	0	0	0	0	0	0	T->C	C->T	0	0	0	C->T	G->T(N)	C->T	0	C->T	T->C	G->A	G->T(N)	G->C(N)	A->T(N)	C->T	G->A	G->C(N)	C->T(N)	T->C	T->C	G->A(N)	G->T(N)	A	yes	476	0
yjm1356	0	0	T->C	0	0	0	0	0	0	0	0	0	C->T	C->T	G->T(N)	0	0	C->T	T->C	G->A	G->T(N)	G->C(N)	A->T(N)	C->T	G->A	G->C(N)	C->T(N)	T->C	T->C	G->A(N)	G->T(N)	A	yes	476	0.304514
yjm1463	0	0	T->C	C->T	0	G->A(N)	0	0	0	0	0	0	0	C->T	G->T(N)	0	0	C->T	T->C	G->A	G->T(N)	G->C(N)	A->T(N)	C->T	G->A	G->C(N)	C->T(N)	T->C	T->C	G->A(N)	G->T(N)	A	yes	476	0.711384
yjm1477	0	0	T->C	0	0	0	0	0	0	0	0	0	C->T	C->T	G->T(N)	0	0	C->T	T->C	G->A	G->T(N)	G->C(N)	A->T(N)	C->T	G->A	G->C(N)	C->T(N)	T->C	T->C	G->A(N)	G->T(N)	A	yes	476	0.539065
yjm1478	0	0	0	0	0	0	0	0	0	0	0	0	0	C->T	G->T(N)	0	0	C->T	T->C	G->A	G->T(N)	G->C(N)	A->T(N)	C->T	G->A	G->C(N)	C->T(N)	T->C	T->C	G->A(N)	G->T(N)	A	yes	476	0.129182
yjm627	0	0	0	0	0	0	0	0	0	0	0	0	C->T	C->T	G->T(N)	0	0	C->T	T->C	G->A	G->T(N)	G->C(N)	A->T(N)	C->T	G->A	G->C(N)	C->T(N)	T->C	T->C	G->A(N)	G->T(N)	A	yes	476	1.09716
yjm1133	0	0	0	0	0	0	T->A(N)	C->T(N)	0	0	C->G(N)	0	C->T	C->T	G->T(N)	0	0	C->T	T->C	G->A	G->T(N)	G->C(N)	A->T(N)	C->T	G->A	G->C(N)	C->T(N)	T->C	T->C	G->A(N)	G->T(N)	A		107	0.844961
yjm1190	0	0	0	0	0	0	T->A(N)	C->T(N)	0	0	C->G(N)	0	C->T	C->T	G->T(N)	0	0	C->T	T->C	G->A	G->T(N)	G->C(N)	A->T(N)	C->T	G->A	G->C(N)	C->T(N)	T->C	T->C	G->A(N)	G->T(N)	A		107	0.974192
yjm1199	0	0	0	0	0	0	T->A(N)	C->T(N)	0	0	C->G(N)	0	C->T	C->T	G->T(N)	0	0	C->T	T->C	G->A	G->T(N)	G->C(N)	A->T(N)	C->T	G->A	G->C(N)	C->T(N)	T->C	T->C	G->A(N)	G->T(N)	A		107	0.00167403
yjm1202	0	0	0	0	0	0	T->A(N)	C->T(N)	0	0	C->G(N)	0	C->T	C->T	G->T(N)	0	0	C->T	T->C	G->A	G->T(N)	G->C(N)	A->T(N)	C->T	G->A	G->C(N)	C->T(N)	T->C	T->C	G->A(N)	G->T(N)	A		107	0.388555
yjm1244	0	0	T->C	0	0	0	0	0	0	0	0	0	0	C->T	G->T(N)	0	0	C->T	T->C	G->A	G->T(N)	G->C(N)	A->T(N)	C->T	G->A	G->C(N)	C->T(N)	T->C	T->C	G->A(N)	G->T(N)	A		328	0
yjm1250	0	0	T->C	0	0	0	0	0	0	0	0	0	C->T	C->T	G->T(N)	0	0	C->T	T->C	G->A	G->T(N)	G->C(N)	A->T(N)	C->T	G->A	G->C(N)	C->T(N)	T->C	T->C	G->A(N)	G->T(N)	A		107	0.983797
yjm1311	0	0	0	0	0	0	T->A(N)	C->T(N)	0	0	C->G(N)	0	C->T	C->T	G->T(N)	0	0	C->T	T->C	G->A	G->T(N)	G->C(N)	A->T(N)	C->T	G->A	G->C(N)	C->T(N)	T->C	T->C	G->A(N)	G->T(N)	A		107	0.953139
yjm1326	0	0	T->C	0	0	0	0	0	0	0	0	0	C->T	C->T	G->T(N)	0	0	C->T	T->C	G->A	G->T(N)	G->C(N)	A->T(N)	C->T	G->A	G->C(N)	C->T(N)	T->C	T->C	G->A(N)	G->T(N)	A		107	0.010886
yjm1332	0	0	0	0	0	0	0	0	0	0	0	0	C->T	C->T	G->T(N)	0	0	C->T	T->C	G->A	G->T(N)	G->C(N)	A->T(N)	C->T	G->A	G->C(N)	C->T(N)	T->C	T->C	G->A(N)	G->T(N)	A		183	0.000755706
yjm1336	0	0	0	0	0	0	0	0	0	0	0	0	C->T	C->T	G->T(N)	0	0	C->T	T->C	G->A	G->T(N)	G->C(N)	A->T(N)	C->T	G->A	G->C(N)	C->T(N)	T->C	T->C	G->A(N)	G->T(N)	A		328	0.00355494
yjm1338	0	0	T->C	0	0	0	0	0	0	0	0	0	C->T	C->T	G->T(N)	0	0	C->T	T->C	G->A	G->T(N)	G->C(N)	A->T(N)	C->T	G->A	G->C(N)	C->T(N)	T->C	T->C	G->A(N)	G->T(N)	A		334	0.598506
yjm1341	0	0	T->C	0	0	0	0	0	0	0	0	0	C->T	C->T	G->T(N)	0	0	C->T	T->C	G->A	G->T(N)	G->C(N)	A->T(N)	C->T	G->A	G->C(N)	C->T(N)	T->C	T->C	G->A(N)	G->T(N)	A		328	0.877919
yjm1355	0	0	T->C	0	0	0	0	0	0	0	0	0	C->T	C->T	G->T(N)	0	0	C->T	T->C	G->A	G->T(N)	G->C(N)	A->T(N)	C->T	G->A	G->C(N)	C->T(N)	T->C	T->C	G->A(N)	G->T(N)	A		183	0
yjm1383	0	0	0	0	0	0	T->A(N)	C->T(N)	0	0	C->G(N)	0	C->T	C->T	G->T(N)	0	0	C->T	T->C	G->A	G->T(N)	G->C(N)	A->T(N)	C->T	G->A	G->C(N)	C->T(N)	T->C	T->C	G->A(N)	G->T(N)	A		107	0.118315
yjm1385	0	0	0	0	0	0	T->A(N)	C->T(N)	0	0	C->G(N)	0	C->T	C->T	G->T(N)	0	0	C->T	T->C	G->A	G->T(N)	G->C(N)	A->T(N)	C->T	G->A	G->C(N)	C->T(N)	T->C	T->C	G->A(N)	G->T(N)	A		107	0.226196
yjm1400	0	0	0	0	0	0	0	0	0	0	0	0	0	C->T	G->T(N)	0	0	C->T	T->C	G->A	G->T(N)	G->C(N)	A->T(N)	C->T	G->A	G->C(N)	C->T(N)	T->C	T->C	G->A(N)	G->T(N)	A		107	0.275105
yjm1417	0	0	T->C	0	0	0	0	0	0	0	0	0	C->T	C->T	G->T(N)	0	0	C->T	T->C	G->A	G->T(N)	G->C(N)	A->T(N)	C->T	G->A	G->C(N)	C->T(N)	T->C	T->C	G->A(N)	G->T(N)	A		328	0.721268
yjm1433	0	0	T->C	C->T	0	G->A(N)	0	0	0	0	0	0	C->T	C->T	G->T(N)	0	0	C->T	T->C	G->A	G->T(N)	G->C(N)	A->T(N)	C->T	G->A	G->C(N)	C->T(N)	T->C	T->C	G->A(N)	G->T(N)	A		328	0.622732
yjm1479	0	0	0	0	0	0	0	0	0	0	0	0	0	C->T	G->T(N)	0	0	C->T	T->C	G->A	G->T(N)	G->C(N)	A->T(N)	C->T	G->A	G->C(N)	C->T(N)	T->C	T->C	G->A(N)	G->T(N)	A		107	0
yjm189	0	0	T->C	0	0	0	0	0	0	0	0	0	C->T	C->T	G->T(N)	0	0	C->T	T->C	G->A	G->T(N)	G->C(N)	A->T(N)	C->T	G->A	G->C(N)	C->T(N)	T->C	T->C	G->A(N)	G->T(N)	A		328	0.00307167
yjm193	0	0	0	0	0	0	0	0	0	0	0	0	0	C->T	G->T(N)	0	0	C->T	T->C	G->A	G->T(N)	G->C(N)	A->T(N)	C->T	G->A	G->C(N)	C->T(N)	T->C	T->C	G->A(N)	G->T(N)	A		125	0
yjm244	0	0	0	0	0	0	0	0	0	0	0	0	C->T	C->T	G->T(N)	0	0	C->T	T->C	G->A	G->T(N)	G->C(N)	A->T(N)	C->T	G->A	G->C(N)	C->T(N)	T->C	T->C	G->A(N)	G->T(N)	A		328	0
yjm248	0	0	T->C	0	0	0	0	0	0	0	0	0	0	C->T	G->T(N)	0	0	C->T	T->C	G->A	G->T(N)	G->C(N)	A->T(N)	C->T	G->A	G->C(N)	C->T(N)	T->C	T->C	G->A(N)	G->T(N)	A		328	0.00288593
yjm271	0	0	0	0	0	0	0	0	0	0	0	0	0	C->T	G->T(N)	0	0	C->T	T->C	G->A	G->T(N)	G->C(N)	A->T(N)	C->T	G->A	G->C(N)	C->T(N)	T->C	T->C	G->A(N)	G->T(N)	A		125	0
yjm320	0	0	0	0	0	0	T->A(N)	C->T(N)	0	0	C->G(N)	0	C->T	C->T	G->T(N)	0	0	C->T	T->C	G->A	G->T(N)	G->C(N)	A->T(N)	C->T	G->A	G->C(N)	C->T(N)	T->C	T->C	G->A(N)	G->T(N)	A		107	0.936695
yjm326	0	0	0	0	0	0	T->A(N)	C->T(N)	0	0	C->G(N)	0	C->T	C->T	G->T(N)	0	0	C->T	T->C	G->A	G->T(N)	G->C(N)	A->T(N)	C->T	G->A	G->C(N)	C->T(N)	T->C	T->C	G->A(N)	G->T(N)	A		107	1.44685
yjm428	0	0	T->C	0	0	0	0	0	0	0	0	0	0	C->T	G->T(N)	0	0	C->T	T->C	G->A	G->T(N)	G->C(N)	A->T(N)	C->T	G->A	G->C(N)	C->T(N)	T->C	T->C	G->A(N)	G->T(N)	A		107	0.00174197
yjm450	0	0	0	0	0	0	T->A(N)	C->T(N)	0	0	C->G(N)	0	C->T	C->T	G->T(N)	0	0	C->T	T->C	G->A	G->T(N)	G->C(N)	A->T(N)	C->T	G->A	G->C(N)	C->T(N)	T->C	T->C	G->A(N)	G->T(N)	A		107	0.0804929
yjm453	0	0	0	0	0	0	0	0	0	0	0	0	C->T	C->T	G->T(N)	0	0	C->T	T->C	G->A	G->T(N)	G->C(N)	A->T(N)	C->T	G->A	G->C(N)	C->T(N)	T->C	T->C	G->A(N)	G->T(N)	A		107	0.82897
yjm541	0	0	0	0	0	0	T->A(N)	C->T(N)	0	0	C->G(N)	0	C->T	C->T	G->T(N)	0	0	C->T	T->C	G->A	G->T(N)	G->C(N)	A->T(N)	C->T	G->A	G->C(N)	C->T(N)	T->C	T->C	G->A(N)	G->T(N)	A		107	0.85918
yjm554	0	0	0	0	0	0	T->A(N)	C->T(N)	0	0	C->G(N)	0	C->T	C->T	G->T(N)	0	0	C->T	T->C	G->A	G->T(N)	G->C(N)	A->T(N)	C->T	G->A	G->C(N)	C->T(N)	T->C	T->C	G->A(N)	G->T(N)	A		107	0.114472
yjm555	0	0	0	0	0	0	T->A(N)	C->T(N)	0	0	C->G(N)	0	C->T	C->T	G->T(N)	0	0	C->T	T->C	G->A	G->T(N)	G->C(N)	A->T(N)	C->T	G->A	G->C(N)	C->T(N)	T->C	T->C	G->A(N)	G->T(N)	A		107	1.12322
yjm681	0	0	0	0	0	0	T->A(N)	C->T(N)	0	0	C->G(N)	0	C->T	C->T	G->T(N)	0	0	C->T	T->C	G->A	G->T(N)	G->C(N)	A->T(N)	C->T	G->A	G->C(N)	C->T(N)	T->C	T->C	G->A(N)	G->T(N)	A		107	0.937185
yjm682	0	0	0	0	0	0	T->A(N)	C->T(N)	0	0	C->G(N)	0	C->T	C->T	G->T(N)	0	0	C->T	T->C	G->A	G->T(N)	G->C(N)	A->T(N)	C->T	G->A	G->C(N)	C->T(N)	T->C	T->C	G->A(N)	G->T(N)	A		107	0.316585
yjm683	0	0	0	0	0	0	T->A(N)	C->T(N)	0	0	C->G(N)	0	C->T	C->T	G->T(N)	0	0	C->T	T->C	G->A	G->T(N)	G->C(N)	A->T(N)	C->T	G->A	G->C(N)	C->T(N)	T->C	T->C	G->A(N)	G->T(N)	A		107	0.949107
yjm689	0	0	0	0	0	0	T->A(N)	C->T(N)	0	0	C->G(N)	0	C->T	C->T	G->T(N)	0	0	C->T	T->C	G->A	G->T(N)	G->C(N)	A->T(N)	C->T	G->A	G->C(N)	C->T(N)	T->C	T->C	G->A(N)	G->T(N)	A		107	0
yjm693	0	0	0	0	0	0	T->A(N)	C->T(N)	0	0	0	0	C->T	C->T	G->T(N)	0	0	C->T	T->C	G->A	G->T(N)	G->C(N)	A->T(N)	C->T	G->A	G->C(N)	C->T(N)	T->C	T->C	G->A(N)	G->T(N)	A		107	1.05409
Sc ATP6 Group 5
yjm1273	0	0	0	C->T	0	0	T->A(N)	C->T(N)	0	0	0	0	0	C->T	G->T(N)	0	0	C->T	T->C	G->A	G->T(N)	G->C(N)	A->T(N)	C->T	G->A	G->C(N)	C->T(N)	T->C	T->C	G->A(N)	G->T(N)	B	yes	476	0.554614
yjm1387	0	0	0	C->T	0	0	T->A(N)	C->T(N)	0	0	0	0	0	C->T	G->T(N)	0	0	C->T	T->C	G->A	G->T(N)	G->C(N)	A->T(N)	C->T	G->A	G->C(N)	C->T(N)	T->C	T->C	G->A(N)	G->T(N)	B	yes	475	0.573775
yjm1402	0	0	0	C->T	0	0	T->A(N)	C->T(N)	0	0	0	0	0	C->T	G->T(N)	0	0	C->T	T->C	G->A	G->T(N)	G->C(N)	A->T(N)	C->T	G->A	G->C(N)	C->T(N)	T->C	T->C	G->A(N)	G->T(N)	B	yes	476	0.435711
yjm1434	0	0	0	C->T	0	0	T->A(N)	C->T(N)	0	0	0	0	0	C->T	G->T(N)	0	0	C->T	T->C	G->A	G->T(N)	G->C(N)	A->T(N)	C->T	G->A	G->C(N)	C->T(N)	T->C	T->C	G->A(N)	G->T(N)	B	yes	476	0.572869
yjm1443	0	0	0	0	0	0	T->A(N)	C->T(N)	0	0	0	0	0	C->T	G->T(N)	0	0	C->T	T->C	G->A	G->T(N)	G->C(N)	A->T(N)	C->T	G->A	G->C(N)	C->T(N)	T->C	T->C	G->A(N)	G->T(N)	B	yes	476	1.05668
yjm1527	0	0	0	0	0	0	T->A(N)	C->T(N)	0	0	0	0	0	C->T	G->T(N)	0	0	C->T	T->C	G->A	G->T(N)	G->C(N)	A->T(N)	C->T	G->A	G->C(N)	C->T(N)	T->C	T->C	G->A(N)	G->T(N)	B	yes	476	0.692656
yjm1573	0	0	0	C->T	0	0	T->A(N)	C->T(N)	0	0	0	0	0	C->T	G->T(N)	0	0	C->T	T->C	G->A	G->T(N)	G->C(N)	A->T(N)	C->T	G->A	G->C(N)	C->T(N)	T->C	T->C	G->A(N)	G->T(N)	B	yes	476	0.418013
yjm1083	0	0	0	C->T	0	0	T->A(N)	C->T(N)	0	0	0	0	0	C->T	G->T(N)	0	0	C->T	T->C	G->A	G->T(N)	G->C(N)	A->T(N)	C->T	G->A	G->C(N)	C->T(N)	T->C	T->C	G->A(N)	G->T(N)	B		107	0
yjm1208	0	0	0	C->T	0	0	T->A(N)	C->T(N)	0	0	0	0	0	C->T	G->T(N)	0	0	C->T	T->C	G->A	G->T(N)	G->C(N)	A->T(N)	C->T	G->A	G->C(N)	C->T(N)	T->C	T->C	G->A(N)	G->T(N)	B		107	0.660485
yjm1304	0	0	0	0	0	0	T->A(N)	C->T(N)	0	0	0	0	0	C->T	G->T(N)	0	0	C->T	T->C	G->A	G->T(N)	G->C(N)	A->T(N)	C->T	G->A	G->C(N)	C->T(N)	T->C	T->C	G->A(N)	G->T(N)	B		107	0.835782
yjm1444	0	0	0	0	0	0	T->A(N)	C->T(N)	0	0	0	0	0	C->T	G->T(N)	0	0	C->T	T->C	G->A	G->T(N)	G->C(N)	A->T(N)	C->T	G->A	G->C(N)	C->T(N)	T->C	T->C	G->A(N)	G->T(N)	B		107	0.448477
yjm1615	0	0	0	C->T	0	0	T->A(N)	C->T(N)	0	0	0	0	0	C->T	G->T(N)	0	0	C->T	T->C	G->A	G->T(N)	G->C(N)	A->T(N)	C->T	G->A	G->C(N)	C->T(N)	T->C	T->C	G->A(N)	G->T(N)	B		107	0.00156483
yjm451	0	0	0	C->T	0	0	T->A(N)	C->T(N)	0	0	0	0	0	C->T	G->T(N)	0	0	C->T	T->C	G->A	G->T(N)	G->C(N)	A->T(N)	C->T	G->A	G->C(N)	C->T(N)	T->C	T->C	G->A(N)	G->T(N)	B		107	0.688176
yjm456	0	0	0	0	0	0	T->A(N)	C->T(N)	0	0	0	0	0	C->T	G->T(N)	0	0	C->T	T->C	G->A	G->T(N)	G->C(N)	A->T(N)	C->T	G->A	G->C(N)	C->T(N)	T->C	T->C	G->A(N)	G->T(N)	B		107	0.704573
YJM789	0	0	0	0	0	0	T->A(N)	C->T(N)	0	0	0	0	0	C->T	G->T(N)	0	0	C->T	T->C	G->A	G->T(N)	G->C(N)	A->T(N)	C->T	G->A	G->C(N)	C->T(N)	T->C	T->C	G->A(N)	G->T(N)	B		107	0.753964
Sc ATP6 Group 1399
yjm1399	C->T	C->T	0	C->T	0	0	T->A(N)	C->T(N)	0	0	0	0	C->T	C->T	G->T(N)	C->T	0	C->T	T->C	G->A	G->T(N)	G->C(N)	A->T(N)	C->T	G->A	G->C(N)	C->T(N)	T->C	T->C	G->A(N)	G->T(N)	1399		42	0.0277921
ATP6 ORF nt position	288	297	345	351	397	400	529	531	543	573	605	648	678	684	693	702	708	714	717	720	721	722	723	729	732	733	734	738	753	763	766
S288C AA+codon	F96	I99	I115	Y117	I133	V134	F177	F177	I181	I191	A202	L216	I226	A228	M231	F234	I236	I238	I239	Q240	G241	G241	G241	V243	W244	A245	A245	I246	Y251	A255	V256
SNP-Modif AA	F96	I99	I115	Y117	I133V	V134I	F177I		I181	I191	A202G	L216F	I226	A228	M231I	F234	I236	I238	I239	Q240	G241S			V243	W244	A245T		I246	Y251	A255T	V256L
																						G241A
		Highlighted	Indicates non-synonymous change
		Red	non-synonymous change for Sc ATP6 Group 3 (YJM1401, 1450,1460,270,470)

## Sheet: Ens2 cut sites
		Ens2 recognition sequences	# of strains	Sc ATP6 Group
	Nakagawa, et al (1992) ens2(0)	TCATTCAGGGATATGTGTGGGCTATT	n=0
	S288c (our reference)	TCATTCAGGGATATGTCTGGGCTATT	n=10	Group 1
		TCATTCAGGGTTATGTATGGGCTATT	n=1	Group 1 (YJM1447)
	Nakagawa, et al (1992) ENS2	TTATCCAATCTTATGTTTGACTTATC	n=80	Group 2, 4, 5, 1399
		TTATCCAAGCTTATGTTTGACTTATC	n=5	Group 3

## Sheet: ENS2
Strain (compared to ENS2 sequence in Nakagawa et al 1991 )	orf length (full = 476)	10	11	14	15	22	45	72	73	82	83	96	106	124	171	216	233	235	240	256	258	263	264	266	269	274	276	277	309	319	328	333	334	361	363	365	376	450	454	497	499	529	530	531	544	568	570	589	614
Sc Group A ens2:
yjm1078	476	0	0	0	0	0	0	0	0	0	0	0	0	0	0	0	0	0	0	0	0	0	0	0	0	0	0	0	0	0	0	0	0	0	0	0	0	0	0	0	0	0	0	0	0	0	0	0	0
yjm1133	107	0	0	0	0	0	0	0	0	0	0	0	0	0	0	0	0	0	0	0	0	0	0	0	0	0	0	40 Ins	0	0	0	0	0	0	0	0	0	0	0	0	31 Ins	0	0	0	0	0	0	0	0
yjm1190	107	0	0	0	0	0	0	0	0	0	0	0	0	0	0	0	0	0	0	0	0	0	0	0	0	0	0	40 Ins	0	0	0	0	0	0	0	0	0	0	0	0	31 Ins	0	0	0	0	0	0	0	0
yjm1199	107	0	0	0	0	0	0	0	0	0	0	0	0	0	0	0	0	0	0	0	0	0	0	0	0	0	0	40 Ins	0	0	0	0	0	0	0	0	0	0	0	0	31 Ins	0	0	0	0	0	0	0	0
yjm1202	107	0	0	0	0	0	0	0	0	0	0	0	0	0	0	0	0	0	0	0	0	0	0	0	0	0	0	40 Ins	0	0	0	0	0	0	0	0	0	0	0	0	31 Ins	0	0	0	0	0	0	0	0
yjm1242	476	0	0	0	0	0	0	0	0	0	0	0	0	0	0	0	0	0	0	0	0	0	0	0	0	0	0	0	0	0	0	0	0	0	0	0	0	0	0	0	0	0	0	0	0	0	0	0	0
yjm1244	328	0	0	0	0	0	0	0	0	0	0	0	0	0	0	0	0	0	0	0	0	0	0	0	0	0	0	0	0	0	0	0	0	0	0	0	0	0	0	0	0	0	0	0	0	0	0	0	0
yjm1250	107	0	0	0	0	0	0	0	0	0	0	0	0	0	0	0	0	0	0	0	0	0	0	0	0	0	0	40 Ins	0	0	0	0	0	0	0	0	0	0	0	0	31 Ins	0	0	0	0	0	0	0	0
yjm1252	476	0	0	0	0	0	0	0	0	0	0	0	0	0	0	0	0	0	0	0	0	0	0	0	0	0	0	0	0	0	0	0	0	0	0	0	0	0	0	0	0	0	0	0	0	0	0	0	0
yjm1311	107	0	0	0	0	0	0	0	0	0	0	0	0	0	0	0	0	0	0	0	0	0	0	0	0	0	0	40 Ins	0	0	0	0	0	0	0	0	0	0	0	0	31 Ins	0	0	0	0	0	0	0	0
yjm1326	107	0	0	0	0	0	0	0	0	0	0	0	0	0	T->A(N)	0	0	0	0	0	0	0	0	0	0	0	0	40 Ins	0	0	0	0	0	0	0	0	0	0	0	0	31 Ins	0	0	0	0	0	0	0	0
yjm1332	183	0	0	0	0	0	0	0	0	0	0	0	0	0	0	0	0	0	0	0	0	0	0	0	0	0	0	0	0	0	0	0	0	0	0	0	0	0	0	0	31 Ins	0	0	0	0	0	0	0	0
yjm1336	328	0	0	0	0	0	0	0	0	0	0	0	0	0	0	0	0	0	0	0	0	0	0	0	0	0	0	0	0	0	0	0	0	0	0	0	0	0	0	0	0	0	0	0	0	0	0	0	0
yjm1338	334	0	0	0	0	0	0	0	0	0	0	0	0	0	0	0	0	0	0	0	0	0	0	0	0	0	0	0	0	0	0	0	0	0	0	0	0	0	0	0	0	0	0	0	0	0	0	0	0
yjm1341	328	0	0	0	0	0	0	0	0	0	0	0	0	0	0	0	0	0	0	0	0	0	0	0	0	0	0	0	0	0	0	0	0	0	0	0	0	0	0	0	0	0	0	0	0	0	0	0	0
yjm1342	476	0	0	0	0	0	0	0	0	0	0	0	0	0	0	0	0	0	0	0	0	0	0	0	0	0	0	0	0	0	0	0	0	0	0	0	0	0	0	0	0	0	0	0	0	0	0	0	0
yjm1355	183	0	0	0	0	0	0	0	0	0	0	0	0	0	0	0	0	0	0	0	0	0	0	0	0	0	0	0	0	0	0	0	0	0	0	0	0	0	0	0	31 Ins	0	0	0	0	0	0	0	0
yjm1356	476	0	0	0	0	0	0	0	0	0	0	0	0	0	0	0	0	0	0	0	0	0	0	0	0	0	0	0	0	0	0	0	0	0	0	0	0	0	0	0	0	0	0	0	0	0	0	0	0
yjm1383	107	0	0	0	0	0	0	0	0	0	0	0	0	0	0	0	0	0	0	0	0	0	0	0	0	0	0	40 Ins	0	0	0	0	0	0	0	0	0	0	0	0	31 Ins	0	0	0	0	0	0	0	0
yjm1385	107	0	0	0	0	0	0	0	0	0	0	0	0	0	0	0	0	0	0	0	0	0	0	0	0	0	0	40 Ins	0	0	0	0	0	0	0	0	0	0	0	0	31 Ins	0	0	0	0	0	0	0	0
yjm1400	107	0	0	A->T(N)	0	0	0	0	0	0	0	0	0	0	0	0	0	0	0	0	0	0	0	0	0	0	0	40 Ins	0	0	0	0	0	0	0	0	0	0	0	0	31 Ins	0	0	0	0	0	0	0	0
yjm1417	328	0	0	0	0	0	0	0	0	0	0	0	0	0	0	0	0	0	0	0	0	0	0	0	0	0	0	0	0	0	0	0	0	0	0	0	0	0	0	0	0	0	0	0	0	0	0	0	0
yjm1443	476	0	0	0	0	0	0	0	0	0	0	0	0	0	0	0	0	0	0	0	0	0	0	0	0	0	0	0	0	0	0	0	0	0	0	0	0	0	0	0	0	0	0	0	0	0	0	0	0
yjm1463	476	0	0	0	0	0	0	0	0	0	0	0	0	0	0	0	0	0	0	0	0	0	0	0	0	0	0	0	0	0	0	0	0	0	0	0	0	0	0	0	0	0	0	0	0	0	0	0	0
yjm1477	476	0	0	0	0	0	0	0	0	0	0	0	0	0	0	0	0	0	0	0	0	0	0	0	0	0	0	0	0	0	0	0	0	0	0	0	0	0	0	0	0	0	0	0	0	0	0	0	0
yjm1478	476	0	0	0	0	0	0	0	0	0	0	0	0	0	0	0	0	0	0	0	0	0	0	0	0	0	0	0	0	0	0	0	0	0	0	0	0	0	0	0	0	0	0	0	0	0	0	0	0
yjm1479	107	0	0	A->T(N)	0	0	0	0	0	0	0	0	0	0	0	0	0	0	0	0	0	0	0	0	0	0	0	40 Ins	0	0	0	0	0	0	0	0	0	0	0	0	31 Ins	0	0	0	0	0	0	0	0
yjm189	328	0	0	0	0	0	0	0	0	0	0	0	0	0	0	0	0	0	0	0	0	0	0	0	0	0	0	0	0	0	0	0	0	0	0	0	0	0	0	0	0	0	0	0	0	0	0	0	0
yjm193	125	0	0	0	0	0	0	0	0	0	0	0	0	0	0	0	0	0	0	0	0	0	0	0	0	0	0	0	0	0	40 Ins	0	0	0	0	0	0	0	0	0	0	0	0	0	0	0	0	0	0
yjm244	328	0	0	0	0	0	0	0	0	0	0	0	0	0	0	0	0	0	0	0	0	0	0	0	0	0	0	0	0	0	0	0	0	0	0	0	0	0	0	0	0	0	0	0	0	0	0	0	0
yjm248	328	0	0	0	0	0	0	0	0	0	0	0	0	0	0	0	0	0	0	0	0	0	0	0	0	0	0	0	0	0	0	0	0	0	0	0	0	0	0	0	0	0	0	0	0	0	0	0	0
yjm271	125	0	0	0	0	0	0	0	0	0	0	0	0	0	0	0	0	0	0	0	0	0	0	0	0	0	0	0	0	0	40 Ins	0	0	0	0	0	0	0	0	0	0	0	0	0	0	0	0	0	0
yjm320	107	0	0	0	0	0	0	0	0	0	0	0	0	0	0	0	0	0	0	0	0	0	0	0	0	0	0	40 Ins	0	0	0	0	0	0	0	0	0	0	0	0	31 Ins	0	0	0	0	0	0	0	0
yjm326	107	0	0	0	0	0	0	0	0	0	0	0	0	0	0	0	0	0	0	0	0	0	0	0	0	0	0	40 Ins	0	0	0	0	0	0	0	0	0	0	0	0	31 Ins	0	0	0	0	0	0	0	0
yjm428	107	0	0	0	0	0	0	0	0	0	0	0	0	0	0	0	0	0	0	0	0	0	0	0	0	0	0	40 Ins	0	0	0	0	0	0	0	0	0	0	0	0	31 Ins	0	0	0	0	0	0	0	0
yjm450	107	0	0	0	0	0	0	0	0	0	0	0	0	0	0	0	0	0	0	0	0	0	0	0	0	0	0	40 Ins	0	0	0	0	0	0	0	0	0	0	0	0	31 Ins	0	0	0	0	0	0	0	0
yjm453	107	0	0	0	0	0	0	0	0	0	0	0	0	0	0	0	0	0	0	0	0	0	0	0	0	0	0	40 Ins	0	0	0	0	0	0	0	0	0	0	0	0	0	0	0	0	0	0	0	0	0
yjm541	107	0	0	0	0	0	0	0	0	0	0	0	0	0	0	0	0	0	0	0	0	0	0	0	0	0	0	40 Ins	0	0	0	0	0	0	0	0	0	0	0	0	31 Ins	0	0	0	0	0	0	0	0
yjm554	107	0	0	0	0	0	0	0	0	0	0	0	0	0	0	0	0	0	0	0	0	0	0	0	0	0	0	40 Ins	0	0	0	0	0	0	0	0	0	0	0	0	31 Ins	0	0	0	0	0	0	0	0
yjm555	107	0	0	0	0	0	0	0	0	0	0	0	0	0	0	0	0	0	0	0	0	0	0	0	0	0	0	40 Ins	0	0	0	0	0	0	0	0	0	0	0	0	31 Ins	0	0	0	0	0	0	0	0
yjm627	476	0	0	0	0	0	0	0	0	0	0	0	0	0	0	0	0	0	0	0	0	0	0	0	0	0	0	0	0	0	0	0	0	0	0	0	0	0	0	0	0	0	0	0	0	0	0	0	0
yjm681	107	0	0	0	0	0	0	0	0	0	0	0	0	0	0	0	0	0	0	0	0	0	0	0	0	0	0	40 Ins	0	0	0	0	0	0	0	0	0	0	0	0	31 Ins	0	0	0	0	0	0	0	0
yjm682	107	0	0	0	0	0	0	0	0	0	0	0	0	0	0	0	0	0	0	0	0	0	0	0	0	0	0	40 Ins	0	0	0	0	0	0	0	0	0	0	0	0	31 Ins	0	0	0	0	0	0	0	0
yjm683	107	0	0	0	0	0	0	0	0	0	0	0	0	0	0	0	0	0	0	0	0	0	0	0	0	0	0	40 Ins	0	0	0	0	0	0	0	0	0	0	0	0	31 Ins	0	0	0	0	0	0	0	0
yjm689	107	0	0	0	0	0	0	0	0	0	0	0	0	0	0	0	0	0	0	0	0	0	0	0	0	0	0	40 Ins	0	0	0	0	0	0	0	0	0	0	0	0	31 Ins	0	0	0	0	0	0	0	0
yjm693	107	0	0	0	0	0	0	0	0	0	0	0	0	0	0	0	0	0	0	0	0	0	0	0	0	0	0	40 Ins	0	0	0	0	0	0	0	0	0	0	0	0	31 Ins	0	0	0	0	0	0	0	0
Sc Group B ens2:
yjm1083	107	0	0	0	0	0	0	0	0	0	0	0	0	0	0	0	0	0	0	0	0	0	0	0	0	0	0	40 Ins	0	0	0	0	0	0	0	0	0	0	0	0	31 Ins	0	0	0	0	0	0	0	0
yjm1527	476	0	0	0	0	0	0	0	0	0	0	0	0	0	0	0	0	0	0	0	0	0	0	0	0	0	0	0	0	0	0	0	0	0	0	0	0	0	0	0	0	0	0	0	0	0	0	0	0
yjm1444	107	0	0	0	0	0	0	0	0	0	0	0	0	0	0	0	0	0	0	0	0	0	0	0	0	0	0	40 Ins	0	0	0	0	0	0	0	0	0	0	0	0	31 Ins	0	0	0	0	0	0	0	0
yjm1615	107	0	0	0	0	0	0	0	0	0	0	0	0	0	0	0	0	0	0	0	0	0	0	0	0	0	0	40 Ins	0	0	0	0	0	0	0	0	0	0	0	0	31 Ins	0	0	0	0	0	0	0	0
yjm1208	107	0	0	0	0	0	0	0	0	0	0	0	0	0	0	0	0	0	0	0	0	0	0	0	0	0	0	40 Ins	0	0	0	0	0	0	0	0	0	0	0	0	31 Ins	0	0	0	0	0	0	0	0
yjm451	107	0	0	0	0	0	0	0	0	0	0	0	0	0	0	0	0	0	0	0	0	0	0	0	0	0	0	40 Ins	0	0	0	0	0	0	0	0	0	0	0	0	31 Ins	0	0	0	0	0	0	0	0
yjm1387	475	0	0	0	0	0	0	0	0	0	0	0	0	0	0	0	0	0	0	0	0	0	0	0	0	0	0	0	0	0	0	0	0	3 Del	0	0	0	0	0	0	0	0	0	0	0	0	0	0	0
yjm1304	107	0	0	0	0	0	0	0	0	0	0	0	0	0	0	0	0	0	0	0	0	0	0	0	0	0	0	40 Ins	0	0	0	0	0	0	0	0	0	0	0	0	31 Ins	0	0	0	0	0	0	0	0
yjm1273	476	0	0	0	0	0	0	0	0	0	0	0	0	0	0	0	0	0	0	0	0	0	0	0	0	0	0	0	0	0	0	0	0	0	0	0	0	0	0	0	0	0	0	0	0	0	0	0	0
yjm1434	476	0	0	0	0	0	0	0	0	0	0	0	0	0	0	0	0	0	0	0	0	0	0	0	0	0	0	0	0	0	0	0	0	0	0	0	0	0	0	0	0	0	0	0	0	0	0	0	0
yjm456	107	0	0	0	0	0	0	0	0	0	0	0	0	0	0	0	0	0	0	0	0	0	0	0	0	0	0	40 Ins	0	0	0	0	0	0	0	0	0	0	0	0	31 Ins	0	0	0	0	0	0	0	0
yjm789	107	0	0	0	0	0	0	0	0	0	0	0	0	0	0	0	0	0	0	0	0	0	0	0	0	0	0	40 Ins	0	0	0	0	0	0	0	0	0	0	0	0	31 Ins	0	0	0	0	0	0	0	0
yjm1433	328	0	0	0	0	0	0	0	0	0	0	0	0	0	0	0	0	0	0	0	0	0	0	0	0	0	0	0	0	0	0	0	0	0	0	0	0	0	0	0	0	0	0	0	0	0	0	0	0
yjm1402	476	0	0	0	0	0	0	0	0	0	0	0	0	0	0	0	0	0	0	0	0	0	0	0	0	0	0	0	0	0	0	0	0	0	0	0	0	0	0	0	0	0	0	0	0	0	0	0	0
yjm1573	476	0	0	0	0	0	0	0	0	0	0	0	0	0	0	0	0	0	0	0	0	0	0	0	0	0	0	0	0	0	0	0	0	0	0	0	0	0	0	0	0	0	0	0	0	0	0	0	0
Sc Group 1399 ens2:
yjm1399	42	0	0	0	0	0	0	0	C->A(N)	0	0	0	G->A(N)	4 Ins	0	0	C->T(N)	C->T(N)	0	0	0	C->A(N)	0	0	1 Ins	0	0	40 Ins	T->G(N)	1 Ins	0	0	0	9 Del	0	C->T(N)	0	0	1 Ins	41 Ins	G->A(N)	A->G(N)	0	G->A(N)	0	A->T(N)	0	0	C->T(N)
[truncated: 54 more columns]

## Sheet: 21s
Position	68	69	70	79	85	89	91	117	131	154	162	174	175	177	180	182	183	184	185	186	187	188	189	192	197	204	214	222	260	332	404	409	543	763	766	1004	1054	1082	1117	1160	1163	1196	1198	1205	1207	1311	1375	1426	1471
yjm1078	0	0	0	0	0	0	0	0	0	0	0	0	0	0	0	0	0	0	0	0	0	0	0	0	0	0	0	0	0	0	G -> A	0	0	T -> A	0	0	1 Del	0	0	6 Ins	0			0	0	0	1 Ins	0	0
yjm1083	0	0	0	0	0	0	0	0	0	0	0	0	0	0	0	0	0	0	0	0	0	0	0	0	0	0	0	0	0	0	0	0	0	0	0	0	1 Del	0	0	0	0			0	0	0	0	0	8 Del
yjm1129	0	T -> A	0	0	0	0	0	0	0	0	0	0	0	A -> T	0	0	0	1 Del	0	0	0	0	0	0	1 Ins	0	0	0	G -> T	0	G -> A	0	0	T -> A	0	0	1 Del	0	0	6 Ins	0			1 Ins	0	0	1 Ins	0	0
yjm1133	0	0	0	0	0	0	0	0	0	0	0	0	0	0	0	0	0	0	0	0	0	0	T -> A	0	0	0	0	0	0	0	0	0	0	0	0	0	0	0	0	0	0			0	0	0	0	0	8 Del
yjm1190	0	0	0	0	0	0	0	0	0	0	0	0	0	0	0	0	0	0	0	0	0	0	0	1 Ins	0	0	0	0	0	0	0	0	0	0	0	0	1 Del	0	0	0	0			1 Ins	0	0	0	0	8 Del
yjm1199	0	0	0	0	0	0	0	0	0	0	0	0	0	0	0	0	0	0	0	0	0	0	T -> A	0	0	0	0	0	0	0	0	0	0	0	0	0	0	0	0	0	0			0	0	0	0	0	8 Del
yjm1202	0	0	0	0	0	0	0	0	0	0	0	0	0	0	0	0	0	0	0	0	0	0	T -> A	0	0	0	0	0	0	0	0	0	0	0	0	0	0	0	0	0	0			0	0	0	0	0	8 Del
yjm1208	0	0	0	0	0	0	0	0	0	0	0	0	0	0	0	0	0	0	0	0	0	0	0	0	0	0	0	0	0	0	0	0	0	0	0	0	0	0	0	0	0			0	0	0	0	0	0
yjm1242	0	T -> A	0	0	0	0	0	0	0	0	0	0	0	A -> T	0	0	0	A -> T	T -> A	0	1 Del	0	0	0	1 Ins	0	0	0	G -> T	0	0	0	0	T -> A	0	0	1 Del	0	0	6 Ins	0			1 Ins	0	0	1 Ins	0	0
yjm1244	0	0	0	0	0	0	0	0	0	0	0	0	0	0	0	0	0	0	0	0	0	0	0	0	0	0	0	0	0	0	0	0	0	T -> A	0	0	1 Del	0	0	6 Ins	0			2 Del	0	0	1 Ins	0	0
yjm1248	0	0	0	0	0	0	0	0	0	0	0	0	0	A -> T	0	2 Ins	0	0	0	0	0	0	0	0	0	0	0	0	0	0	0	0	A -> T	0	0	0	0	0	0	0	0			2 Del	0	0	0	0	8 Del
yjm1250	0	T -> A	0	0	0	0	0	0	0	0	0	0	0	A -> T	0	0	0	A -> T	0	1 Ins	0	0	0	0	1 Ins	0	0	0	G -> T	0	0	0	0	T -> A	0	0	1 Del	0	0	6 Ins	0			1 Ins	0	0	1 Ins	0	0
yjm1252	0	T -> A	0	0	0	0	0	0	0	0	0	0	0	A -> T	0	0	0	A -> T	0	0	0	0	0	0	1 Ins	0	0	0	G -> T	0	G -> A	0	0	0	0	0	1 Del	0	0	6 Ins	0			2 Del	0	0	1 Ins	0	0
yjm1273	0	0	0	0	0	0	0	0	0	0	0	0	0	0	0	0	0	0	0	0	0	0	0	1 Ins	0	0	0	0	0	0	0	0	A -> T	0	0	0	1 Del	0	0	0	0			1 Ins	0	0	0	1 Ins	8 Del
yjm1304	0	0	0	0	0	0	0	0	0	0	0	0	0	0	0	0	0	0	0	0	0	0	T -> A	0	0	0	0	0	0	0	0	0	0	0	0	0	0	0	0	0	0			0	0	0	0	0	8 Del
yjm1307	0	0	0	0	0	0	0	0	0	0	0	0	0	0	0	0	0	0	0	0	0	0	T -> A	0	0	0	0	0	0	0	0	0	A -> T	0	0	0	0	0	G -> A	0	0			0	0	0	0	0	8 Del
yjm1311	0	0	0	0	0	0	0	0	0	0	0	0	0	A -> T	0	0	1 Ins	0	0	0	0	0	0	0	0	0	0	0	0	0	0	0	A -> T	0	0	0	0	4 Ins	0	0	0			1 Ins	0	0	0	0	8 Del
yjm1326	0	0	0	0	0	0	0	0	0	0	0	0	0	0	0	0	0	0	0	0	0	0	T -> A	0	0	0	0	0	0	0	0	0	0	0	0	0	1 Del	0	0	0	0			1 Ins	0	0	0	0	8 Del
yjm1332	0	0	0	0	0	0	0	0	0	0	0	0	0	0	0	0	0	0	0	0	0	0	0	0	0	0	0	0	G -> T	0	0	0	0	T -> A	0	0	1 Del	0	0	6 Ins	0			1 Ins	0	0	1 Ins	0	0
yjm1336	0	0	0	0	0	0	0	0	0	0	0	0	0	0	0	0	0	0	0	0	0	0	0	0	0	0	0	0	G -> T	0	0	0	0	T -> A	0	0	1 Del	0	0	6 Ins	0			1 Ins	0	0	1 Ins	0	0
yjm1338	0	T -> A	0	0	0	0	0	0	0	0	0	0	0	A -> T	0	0	0	0	0	0	0	0	3 Del	0	1 Ins	0	0	0	G -> T	0	G -> A	0	0	T -> A	0	0	1 Del	0	0	6 Ins	0			0	0	0	1 Ins	0	0
yjm1341	0	T -> A	0	0	0	0	0	0	0	0	0	0	0	A -> T	0	0	0	A -> T	0	1 Ins	0	0	0	0	1 Ins	0	0	0	G -> T	0	G -> A	0	0	T -> A	0	0	1 Del	0	0	6 Ins	0			1 Ins	0	0	1 Ins	0	0
yjm1342	0	0	0	0	0	0	0	0	0	0	0	0	0	A -> T	0	0	2 Ins	0	0	0	0	0	0	0	0	0	0	0	0	1 Ins	0	0	A -> T	0	0	0	1 Del	0	0	0	0			1 Ins	0	0	0	0	8 Del
yjm1355	0	0	0	0	0	0	0	0	0	0	0	0	0	0	0	0	0	0	0	0	0	0	0	1 Ins	0	0	0	0	0	0	0	0	A -> T	0	0	0	1 Ins	0	0	0	0			2 Ins	0	0	0	0	8 Del
yjm1356	0	T -> A	0	0	0	0	0	0	0	0	0	0	0	A -> T	0	0	0	1 Del	0	0	0	0	0	0	1 Ins	0	0	0	0	0	0	0	0	T -> A	0	0	1 Del	0	0	6 Ins	0			2 Del	0	0	0	0	8 Del
yjm1381	0	0	0	0	0	0	0	0	0	0	0	0	0	0	0	0	0	0	0	0	0	0	T -> A	0	0	0	0	0	0	0	0	0	0	0	0	0	0	0	0	0	0			0	0	0	0	0	8 Del
yjm1383	0	0	0	0	0	0	0	0	0	0	0	0	0	0	0	0	0	0	0	0	0	0	T -> A	0	0	0	0	0	0	0	0	0	A -> T	0	0	0	0	0	0	0	0			0	0	0	0	0	8 Del
yjm1385	0	0	0	0	0	0	0	0	0	0	0	0	0	0	0	0	0	0	0	0	0	0	T -> A	0	0	0	0	0	0	0	0	0	0	0	0	0	0	0	0	0	0			0	0	1 Ins	0	0	8 Del
yjm1386	0	0	0	0	0	0	0	0	0	0	0	0	0	0	0	0	0	0	0	0	0	0	T -> A	0	0	0	0	0	0	0	0	0	0	0	0	0	0	0	0	0	0			0	0	0	0	0	8 Del
yjm1387	0	0	0	0	0	0	0	0	0	0	0	0	0	0	0	0	0	0	0	0	0	0	T -> A	0	0	0	0	0	0	0	0	0	0	0	0	0	1 Ins	0	0	0	0			2 Ins	0	0	0	0	8 Del
yjm1388	0	0	0	0	0	0	0	0	0	0	0	0	0	0	0	0	0	0	0	0	0	0	T -> A	0	0	0	0	0	0	0	0	0	A -> T	0	0	0	0	0	G -> A	0	0			1 Ins	0	0	0	0	8 Del
yjm1389	0	0	0	0	0	0	0	0	0	0	0	0	0	0	0	0	0	0	0	0	0	0	T -> A	0	0	0	0	0	0	0	0	0	A -> T	0	0	0	0	0	G -> A	0	0			1 Ins	0	0	0	0	8 Del
yjm1399	1 Ins	0	A -> T	3 Del	A -> G	A -> T	14 Ins	T -> A	C -> T	T -> G	T -> A	G -> A	1 Ins	0	T -> A	0	0	0	0	0	0	0	0	0	0	19 Del	2 Ins	1 Del	G -> T	0	0	0	0	0	0	T -> C	2 Del	2 Del	0	0	1 Ins			3 Ins	0	0	0	0	0
yjm1400	0	0	0	0	0	0	0	0	0	0	0	0	0	A -> T	0	0	1 Ins	0	0	0	0	0	0	1 Ins	0	0	0	0	0	0	0	0	A -> T	0	0	0	0	0	0	0	0			0	0	0	0	1 Ins	8 Del
yjm1401	0	0	0	0	0	0	0	0	0	0	0	0	0	A -> T	0	0	1 Ins	0	0	0	0	0	0	0	0	0	0	0	0	0	0	0	A -> T	0	0	0	0	4 Ins	0	0	0			1 Ins	0	0	0	0	8 Del
yjm1402	0	0	0	0	0	0	0	0	0	0	0	0	0	A -> T	0	0	1 Ins	0	0	0	0	0	0	1 Ins	0	0	0	0	0	0	0	0	A -> T	0	0	0	0	0	0	0	0			1 Ins	0	0	0	0	8 Del
yjm1415	0	0	0	0	0	0	0	0	0	0	0	0	0	0	0	0	0	0	0	0	0	0	0	0	0	0	0	0	0	0	0	0	0	T -> A	0	0	1 Del	0	0	6 Ins	0			2 Del	0	0	1 Ins	0	0
yjm1417	0	T -> A	0	0	0	0	0	0	0	0	0	0	0	A -> T	0	0	0	0	2 Del	0	0	0	0	0	1 Ins	0	0	0	G -> T	0	0	0	0	T -> A	0	0	1 Del	0	0	6 Ins	0			0	0	0	1 Ins	0	0
yjm1418	0	0	0	0	0	0	0	0	0	0	0	0	0	A -> T	0	0	0	0	0	0	0	0	0	0	0	0	0	0	0	0	0	0	A -> T	0	0	0	2 Del	0	0	0	0			1 Ins	0	0	0	0	8 Del
yjm1419	0	0	0	0	0	0	0	0	0	0	0	0	0	0	0	0	0	0	0	0	0	0	T -> A	0	0	0	0	0	0	0	0	0	A -> T	0	0	0	0	0	G -> A	0	1 Ins			1 Ins	0	0	0	1 Ins	8 Del
yjm1433	0	0	0	0	0	0	0	0	0	0	0	0	0	0	0	0	0	0	0	0	0	0	0	0	0	0	0	0	G -> T	0	0	0	0	T -> A	0	0	1 Del	0	0	6 Ins	0			1 Ins	0	0	1 Ins	0	0
yjm1434	0	0	0	0	0	0	0	0	0	0	0	0	0	0	0	0	0	0	0	0	0	0	0	1 Ins	0	0	0	0	0	0	0	0	A -> T	0	0	0	1 Del	0	0	0	0			1 Ins	0	0	0	1 Ins	8 Del
yjm1439	0	0	0	0	0	0	0	0	0	0	0	0	0	A -> T	0	2 Ins	0	0	0	0	0	0	0	0	0	0	0	0	0	0	0	0	A -> T	0	0	0	0	0	0	0	0			2 Del	0	0	0	0	8 Del
yjm1443	0	0	0	0	0	0	0	0	0	0	0	0	0	0	0	0	0	0	0	0	0	0	0	1 Ins	0	0	0	0	0	0	0	0	A -> T	0	0	0	1 Del	0	0	0	0			1 Ins	0	0	0	0	8 Del
yjm1444	0	0	0	0	0	0	0	0	0	0	0	0	0	A -> T	0	0	0	0	0	0	0	0	0	0	0	0	0	0	0	0	0	0	0	0	0	0	1 Ins	4 Ins	0	0	0			1 Ins	0	0	0	1 Ins	8 Del
yjm1447	0	0	0	0	0	0	0	0	0	0	0	0	0	A -> T	0	0	0	0	0	0	0	0	0	0	0	0	0	0	0	1 Ins	0	A -> G	A -> T	0	0	0	2 Del	0	0	0	0			0	0	0	0	0	8 Del
yjm1450	0	0	0	0	0	0	0	0	0	0	0	0	0	0	0	0	0	0	0	0	0	0	0	0	0	0	0	0	0	0	0	0	A -> T	0	0	0	0	0	0	0	0			2 Del	0	0	0	0	8 Del
yjm1460	0	0	0	0	0	0	0	0	0	0	0	0	0	0	0	0	0	0	0	0	0	0	T -> A	0	0	0	0	0	0	0	0	0	A -> T	0	0	0	1 Del	0	0	0	0			1 Ins	0	0	0	0	8 Del
yjm1463	0	T -> A	0	0	0	0	0	0	0	0	0	0	0	A -> T	0	0	0	1 Del	0	0	0	0	0	0	1 Ins	0	0	0	G -> T	0	G -> A	0	0	0	0	0	1 Del	0	0	6 Ins	0			1 Ins	0	0	1 Ins	0	0
yjm1477	0	T -> A	0	0	0	0	0	0	0	0	0	0	0	A -> T	0	0	0	A -> T	T -> A	0	1 Del	0	0	0	1 Ins	0	0	0	G -> T	0	0	0	0	T -> A	0	0	1 Del	0	0	6 Ins	0			1 Ins	0	0	1 Ins	0	0
yjm1478	0	T -> A	0	0	0	0	0	0	0	0	0	0	0	A -> T	0	0	0	0	0	0	0	0	3 Del	0	1 Ins	0	0	0	G -> T	0	0	0	0	T -> A	0	0	1 Del	0	0	6 Ins	0			0	0	0	1 Ins	0	0
yjm1479	0	0	0	0	0	0	0	0	0	0	0	0	0	A -> T	0	0	1 Ins	0	0	0	0	0	0	1 Ins	0	0	0	0	0	0	0	0	A -> T	0	0	0	0	0	0	0	0			0	0	0	0	1 Ins	8 Del
yjm1526	0	T -> A	0	0	0	0	0	0	0	0	0	0	0	A -> T	0	0	0	1 Del	0	0	0	0	0	0	1 Ins	0	0	0	G -> T	0	G -> A	0	0	T -> A	0	0	1 Del	0	0	6 Ins	0			1 Ins	0	0	1 Ins	0	0
yjm1527	0	0	0	0	0	0	0	0	0	0	0	0	0	A -> T	0	0	0	0	0	0	0	0	0	0	0	0	0	0	0	0	0	0	0	0	0	0	1 Ins	4 Ins	0	0	0			1 Ins	0	0	0	1 Ins	8 Del
yjm1549	0	0	0	0	0	0	0	0	0	0	0	0	0	0	0	0	0	0	0	0	0	0	T -> A	0	0	0	0	0	0	0	0	0	A -> T	0	0	0	0	0	0	0	0			0	0	0	0	0	8 Del
yjm1573	0	0	0	0	0	0	0	0	0	0	0	0	0	A -> T	0	0	1 Ins	0	0	0	0	0	0	1 Ins	0	0	0	0	0	0	0	0	A -> T	0	0	0	0	0	0	0	0			1 Ins	0	0	0	0	8 Del
yjm1574	0	0	0	0	0	0	0	0	0	0	0	0	0	0	0	0	0	0	0	0	0	0	T -> A	0	0	0	0	0	0	0	0	0	0	0	0	0	0	0	0	0	0			0	0	0	0	0	8 Del
yjm1592	0	0	0	0	0	0	0	0	0	0	0	0	0	0	0	0	0	0	0	0	0	0	T -> A	0	0	0	0	0	0	0	0	0	A -> T	0	0	0	0	0	G -> A	0	0			1 Ins	0	0	0	0	8 Del
yjm1615	0	0	0	0	0	0	0	0	0	0	0	0	0	0	0	0	0	0	0	0	0	0	0	0	0	0	0	0	0	0	0	0	0	0	0	0	0	0	0	0	0			0	0	0	0	0	0
yjm189	0	0	0	0	0	0	0	0	0	0	0	0	0	0	0	0	0	0	0	0	0	0	0	0	0	0	0	0	0	0	0	0	0	T -> A	0	0	1 Del	0	0	6 Ins	0			2 Ins	0	0	1 Ins	0	0
yjm193	0	T -> A	0	0	0	0	0	0	0	0	0	0	0	A -> T	0	0	0	A -> T	0	0	0	0	0	0	1 Ins	0	0	0	G -> T	0	0	0	0	0	4 Del	0	1 Del	0	0	6 Ins	0			1 Ins	0	0	1 Ins	0	0
yjm195	0	0	0	0	0	0	0	0	0	0	0	0	0	A -> T	0	0	1 Ins	0	0	0	0	0	0	1 Ins	0	0	0	0	0	0	0	0	A -> T	0	0	0	0	0	0	0	0			2 Ins	0	0	0	0	8 Del
yjm244	0	T -> A	0	0	0	0	0	0	0	0	0	0	0	A -> T	0	0	0	0	0	0	0	0	3 Del	0	1 Ins	0	0	0	G -> T	0	G -> A	0	0	T -> A	0	0	1 Del	0	0	6 Ins	0			0	1 Del	0	1 Ins	0	0
yjm248	0	T -> A	0	0	0	0	0	0	0	0	0	0	0	A -> T	0	0	0	0	0	2 Del	0	0	0	0	1 Ins	0	0	0	G -> T	0	G -> A	0	0	T -> A	0	0	1 Del	0	0	6 Ins	0			0	0	0	1 Ins	0	0
yjm270	0	T -> A	0	0	0	0	0	0	0	0	0	0	0	A -> T	0	0	0	1 Del	0	T -> A	0	0	0	0	1 Ins	0	0	0	G -> T	0	G -> A	0	0	0	0	0	1 Del	0	0	6 Ins	0			1 Del	0	0	1 Ins	0	0
yjm271	0	T -> A	0	0	0	0	0	0	0	0	0	0	0	A -> T	0	0	0	A -> T	0	0	0	0	0	0	1 Ins	0	0	0	G -> T	0	0	0	0	0	4 Del	0	1 Del	0	0	6 Ins	0			1 Ins	0	0	1 Ins	0	0
yjm320	0	0	0	0	0	0	0	0	0	0	0	0	0	0	0	0	0	0	0	0	0	0	T -> A	0	0	0	0	0	0	0	0	0	0	0	0	0	0	0	0	0	0			0	0	0	0	0	8 Del
yjm326	0	0	0	0	0	0	0	0	0	0	0	0	0	0	0	0	0	0	0	0	0	0	T -> A	0	0	0	0	0	0	0	0	0	0	0	0	0	0	0	0	0	0			0	0	0	0	0	8 Del
yjm428	0	0	0	0	0	0	0	0	0	0	0	0	0	0	0	0	0	0	0	0	0	0	T -> A	0	0	0	0	0	0	0	0	0	0	0	0	0	0	0	0	0	0			0	0	0	0	0	8 Del
yjm450	0	0	0	0	0	0	0	0	0	0	0	0	0	0	0	0	0	0	0	0	0	0	T -> A	0	0	0	0	0	0	0	0	0	0	0	0	0	1 Del	0	0	0	0			0	0	0	0	0	8 Del
yjm451	0	0	0	0	0	0	0	0	0	0	0	0	0	0	0	0	0	0	0	0	0	0	0	0	0	0	0	0	0	0	0	0	0	0	0	0	0	0	0	0	0			0	0	0	0	0	0
yjm453	0	T -> A	0	0	0	0	0	0	0	0	0	0	0	A -> T	0	0	0	0	2 Del	0	0	0	0	0	1 Ins	0	0	0	0	0	0	0	0	T -> A	0	0	1 Del	0	0	6 Ins	0			0	0	0	1 Ins	0	0
yjm456	0	0	0	0	0	0	0	0	0	0	0	0	0	0	0	0	0	0	0	0	0	0	0	1 Ins	0	0	0	0	0	0	0	0	A -> T	0	0	0	1 Del	0	0	0	0			1 Ins	0	0	0	0	8 Del
yjm470	0	0	0	0	0	0	0	0	0	0	0	0	0	0	0	0	0	0	0	0	0	0	0	0	0	0	0	0	0	0	0	0	A -> T	0	0	0	0	0	0	0	0			2 Del	0	0	0	1 Ins	8 Del
yjm541	0	0	0	0	0	0	0	0	0	0	0	0	0	0	0	0	0	0	0	0	0	0	T -> A	0	0	0	0	0	0	0	0	0	0	0	0	0	0	0	0	0	0			0	0	0	0	0	8 Del
yjm554	0	0	0	0	0	0	0	0	0	0	0	0	0	0	0	0	0	0	0	0	0	0	T -> A	0	0	0	0	0	0	0	0	0	0	0	0	0	0	0	0	0	0			0	0	0	0	0	8 Del
yjm555	0	0	0	0	0	0	0	0	0	0	0	0	0	0	0	0	0	0	0	0	0	0	0	1 Ins	0	0	0	0	0	0	0	0	A -> T	0	0	0	1 Del	0	0	0	0			1 Ins	0	0	0	0	8 Del
yjm627	0	0	0	0	0	0	0	0	0	0	0	0	0	A -> T	0	2 Ins	0	0	0	0	0	0	0	0	0	0	0	0	0	0	0	0	A -> T	0	0	0	0	0	0	0	0			2 Del	0	0	0	0	8 Del
yjm681	0	0	0	0	0	0	0	0	0	0	0	0	0	A -> T	0	0	1 Ins	0	0	0	0	0	0	0	0	0	0	0	0	0	0	0	A -> T	0	0	0	0	4 Ins	0	0	0			1 Ins	0	0	0	0	8 Del
yjm682	0	0	0	0	0	0	0	0	0	0	0	0	0	0	0	0	0	0	0	0	0	0	T -> A	0	0	0	0	0	0	0	0	0	0	0	0	0	0	0	0	0	0			0	0	0	0	0	8 Del
yjm683	0	0	0	0	0	0	0	0	0	0	0	0	0	0	0	0	0	0	0	0	0	0	T -> A	0	0	0	0	0	0	0	0	0	0	0	0	0	0	0	0	0	0			0	0	0	0	0	8 Del
yjm689	0	0	0	0	0	0	0	0	0	0	0	0	0	0	0	0	0	0	0	0	0	0	0	0	0	0	0	0	0	0	0	0	0	0	0	0	1 Del	0	0	0	0			0	0	0	0	0	8 Del
yjm693	0	0	0	0	0	0	0	0	0	0	0	0	0	0	0	0	0	0	0	0	0	0	T -> A	0	0	0	0	0	0	0	0	0	0	T -> A	0	0	1 Del	0	0	6 Ins	0			0	0	0	1 Ins	0	0
yjm969	0	T -> A	0	0	0	0	0	0	0	0	0	0	0	A -> T	0	0	0	A -> T	0	1 Ins	0	0	0	0	1 Ins	0	0	0	G -> T	0	G -> A	0	0	T -> A	0	0	1 Del	0	0	6 Ins	0			1 Ins	0	0	1 Ins	0	0
yjm972	0	T -> A	0	0	0	0	0	0	0	0	0	0	0	A -> T	0	0	0	A -> T	0	1 Ins	0	0	0	0	1 Ins	0	0	0	G -> T	0	G -> A	0	0	T -> A	0	0	1 Del	0	0	6 Ins	0			1 Ins	0	0	1 Ins	0	0
yjm975	0	T -> A	0	0	0	0	0	0	0	0	0	0	0	A -> T	0	0	0	A -> T	0	1 Ins	0	0	0	0	1 Ins	0	0	0	G -> T	0	G -> A	0	0	T -> A	0	0	1 Del	0	0	6 Ins	0			1 Ins	0	0	1 Ins	0	0
yjm978	0	T -> A	0	0	0	0	0	0	0	0	0	0	0	A -> T	0	0	0	A -> T	0	1 Ins	0	0	0	0	1 Ins	0	0	0	G -> T	0	G -> A	0	0	T -> A	0	0	1 Del	0	0	6 Ins	0			1 Ins	0	0	1 Ins	0	0
yjm981	0	T -> A	0	0	0	0	0	0	0	0	0	0	0	A -> T	0	0	0	A -> T	0	1 Ins	0	0	0	0	1 Ins	0	0	0	G -> T	0	G -> A	0	0	T -> A	0	0	1 Del	0	0	6 Ins	0			1 Ins	0	0	1 Ins	0	0
yjm984	0	T -> A	0	0	0	0	0	0	0	0	0	0	0	A -> T	0	0	0	A -> T	0	1 Ins	0	0	0	0	1 Ins	0	0	0	G -> T	0	G -> A	0	0	T -> A	0	0	1 Del	0	0	6 Ins	0			1 Ins	0	0	1 Ins	0	0
yjm987	0	T -> A	0	0	0	0	0	0	0	0	0	0	0	A -> T	0	0	0	A -> T	0	1 Ins	0	0	0	0	1 Ins	0	0	0	G -> T	0	G -> A	0	0	T -> A	0	0	1 Del	0	0	6 Ins	0			1 Ins	0	0	1 Ins	0	0
yjm990	0	T -> A	0	0	0	0	0	0	0	0	0	0	0	A -> T	0	0	0	A -> T	0	1 Ins	0	0	0	0	1 Ins	0	0	0	G -> T	0	G -> A	0	0	T -> A	0	0	1 Del	0	0	6 Ins	0			1 Ins	0	0	1 Ins	0	0
yjm993	0	T -> A	0	0	0	0	0	0	0	0	0	0	0	A -> T	0	0	0	A -> T	0	1 Ins	0	0	0	0	1 Ins	0	0	0	G -> T	0	G -> A	0	0	T -> A	0	0	1 Del	0	0	6 Ins	0			1 Ins	0	0	1 Ins	0	0
yjm996	0	T -> A	0	0	0	0	0	0	0	0	0	0	0	A -> T	0	0	0	A -> T	0	1 Ins	0	0	0	0	1 Ins	0	0	0	G -> T	0	G -> A	0	0	T -> A	0	0	1 Del	0	0	6 Ins	0			1 Ins	0	0	1 Ins	0	0
SK1	0	0	0	0	0	0	0	0	0	0	0	0	0	A -> T	0	0	0	0	0	0	0	0	0	0	0	0	0	0	0	0	0	0	A -> T	0	0	0	0	0	0	0	0	2 Del	2 Del	0	0	0	0	0	0
YJM789	0	0	0	0	0	0	0	0	0	0	0	0	0	0	0	0	0	0	0	0	0	0	0	1 Ins	0	0	0	0	0	0	0	0	0	0	0	0	1 Del	0	0	0	0			1 Ins	0	0	0	0	8 Del
[truncated: 71 more columns]

## Sheet: 15s
Position	8	11	130	134	167	170	175	177	182	183	184	186	201	206	213	275	424	427	430	436	441	449	470	475	476	477	478	546	547	549	551	553	565	567	572	577	583	585	586	592	595	599	703	704	708	728	730	732	903
yjm1078	A -> T	0	0	0	0	0	0	0	0	0	0	0	0	0	0	0	0	0	1 Ins	0	40 Ins	0	0	0	0	3 Del	0	0	0	0	0	0	0	0	0	T -> A	0	0	1 Del	0	0	0	0	0	0	0	0	0	0
yjm1083	0	0	0	0	0	0	0	0	0	0	0	0	0	0	0	0	0	0	0	0	40 Ins	A -> T	0	0	0	0	0	0	0	0	1 Del	0	0	0	0	0	0	0	1 Del	0	0	0	0	0	0	0	1 Del	0	0
yjm1129	0	0	0	0	0	0	0	0	0	0	0	0	0	0	0	0	0	0	0	0	0	0	0	0	0	0	0	0	0	0	0	0	0	0	0	0	0	0	0	0	0	0	0	0	0	1 Del	0	0	0
yjm1133	A -> T	0	0	0	0	0	0	0	0	0	0	0	0	0	0	0	0	0	1 Ins	0	0	0	0	4 Del	0	0	0	0	0	0	0	0	0	0	0	T -> A	0	0	1 Del	0	0	0	0	0	0	1 Del	0	0	0
yjm1190	A -> T	0	0	0	0	0	0	0	0	0	0	0	0	0	0	0	0	0	1 Ins	0	0	0	0	4 Del	0	0	0	0	0	0	0	0	0	0	0	T -> A	0	0	1 Del	0	0	0	0	0	0	1 Del	0	0	0
yjm1199	A -> T	0	0	0	0	0	0	0	0	0	0	0	0	0	0	0	0	0	1 Ins	0	0	0	0	4 Del	0	0	0	0	0	0	0	0	0	0	0	T -> A	0	0	1 Del	0	0	0	0	0	0	1 Del	0	0	0
yjm1202	A -> T	0	0	0	0	0	0	0	0	0	0	0	0	0	0	0	0	0	1 Ins	0	0	0	0	4 Del	0	0	0	0	0	0	0	0	0	0	0	T -> A	0	0	1 Del	0	0	0	0	0	0	1 Del	0	0	0
yjm1208	0	0	0	0	0	0	0	0	0	0	0	0	0	0	0	0	0	0	0	0	0	0	0	0	0	0	0	0	0	0	0	0	0	0	0	0	0	0	0	0	0	0	0	0	0	0	1 Del	0	0
yjm1242	0	0	0	0	0	0	0	T -> A	0	0	0	0	0	0	0	0	0	0	0	0	0	0	0	0	0	3 Del	0	0	0	0	0	0	0	0	0	T -> A	0	0	1 Del	0	0	0	0	0	0	0	0	0	0
yjm1244	A -> T	0	0	0	0	0	0	0	0	0	0	0	0	0	0	0	0	0	1 Ins	0	0	0	0	0	0	3 Del	0	0	0	0	0	0	0	0	0	0	0	0	0	0	0	0	0	0	0	1 Del	0	0	0
yjm1248	0	0	0	0	0	0	0	0	0	0	0	0	0	0	0	0	0	0	0	0	0	0	0	0	0	0	0	0	0	0	1 Ins	0	0	0	0	0	0	0	0	0	0	0	0	0	0	0	0	0	0
yjm1250	A -> T	0	0	0	0	0	0	0	0	0	0	0	0	0	0	0	0	0	0	0	40 Ins	0	0	0	0	0	0	0	0	0	1 Del	0	0	0	0	0	0	0	1 Del	0	0	0	0	0	0	0	1 Del	0	0
yjm1252	0	0	0	0	0	0	0	T -> A	0	0	0	0	0	0	0	0	0	0	0	0	0	0	0	0	0	3 Del	0	0	0	0	0	0	0	0	0	T -> A	0	0	1 Del	0	0	0	0	0	0	0	0	0	0
yjm1273	0	0	0	0	0	0	0	0	0	0	0	0	0	0	0	0	0	0	0	0	0	0	0	0	0	0	0	0	0	0	0	0	0	0	0	0	0	0	0	0	0	0	0	0	0	0	1 Del	0	0
yjm1304	0	0	0	0	0	0	0	0	0	0	0	0	0	0	0	0	0	0	0	0	0	A -> T	0	0	0	0	0	0	0	0	0	0	0	0	0	0	0	0	0	0	0	0	0	0	0	0	1 Del	0	0
yjm1307	0	0	0	0	0	0	0	0	0	0	0	0	0	0	0	0	0	0	0	0	0	0	0	0	0	0	0	0	0	0	0	0	0	0	0	0	0	0	0	0	0	0	0	0	0	0	0	0	0
yjm1311	0	0	0	0	0	0	0	0	0	0	0	0	0	0	0	0	0	0	0	0	0	A -> T	0	0	0	0	0	0	0	0	1 Del	0	0	0	0	0	0	0	1 Del	0	0	0	0	0	0	0	1 Del	0	0
yjm1326	0	0	0	0	0	0	0	0	0	0	0	0	0	0	0	0	0	0	0	0	0	A -> T	0	0	0	0	0	0	0	0	0	0	0	0	0	0	0	0	0	0	0	0	0	0	0	0	1 Del	0	0
yjm1332	A -> T	0	0	0	0	0	0	0	0	0	0	0	0	0	0	0	0	0	1 Ins	0	0	0	0	4 Del	0	0	0	0	0	0	0	0	0	0	0	T -> A	0	0	1 Del	0	0	0	0	0	0	0	0	0	0
yjm1336	A -> T	0	0	0	0	0	0	0	0	0	0	0	0	0	0	0	0	0	1 Ins	0	0	0	0	0	0	3 Del	0	0	0	0	0	0	0	0	0	T -> A	0	0	1 Del	0	0	0	0	0	0	0	0	0	0
yjm1338	A -> T	0	0	0	0	0	0	0	0	0	0	0	0	0	0	0	0	0	0	0	0	0	0	0	0	0	0	0	0	0	0	0	0	0	0	0	0	0	0	0	0	0	0	0	0	1 Del	0	0	0
yjm1341	A -> T	0	0	0	0	0	0	0	0	0	0	0	0	0	0	0	0	0	1 Ins	0	0	0	0	4 Del	0	0	0	0	0	0	0	0	0	0	0	T -> A	0	0	1 Del	0	0	0	0	0	0	0	0	0	0
yjm1342	0	0	0	0	0	0	0	0	0	0	0	0	0	0	0	0	0	0	1 Ins	0	0	0	0	0	0	3 Del	0	0	0	0	0	0	0	0	0	T -> A	0	0	1 Del	0	0	0	0	0	0	0	1 Del	0	0
yjm1355	0	0	0	0	0	0	0	0	0	0	0	0	0	0	0	0	0	0	0	0	40 Ins	A -> T	0	0	0	0	0	0	0	0	0	0	0	0	0	0	0	0	0	0	0	0	0	0	0	0	1 Del	0	0
yjm1356	0	0	0	0	0	0	0	0	0	0	0	0	0	0	0	0	0	0	0	0	0	0	0	0	0	0	0	0	0	0	0	0	0	0	0	0	0	0	0	0	0	0	0	0	0	1 Del	0	0	0
yjm1381	0	0	0	0	0	0	0	0	0	0	0	0	0	0	0	0	0	0	0	0	40 Ins	A -> T	0	0	0	0	0	0	0	0	1 Del	0	0	0	0	0	0	0	1 Del	0	0	0	0	0	0	0	1 Del	0	0
yjm1383	0	0	0	0	0	0	0	0	0	0	0	0	0	0	0	0	0	0	0	0	40 Ins	0	0	0	0	0	0	0	0	0	0	0	0	0	0	0	0	0	0	0	0	0	0	0	0	0	1 Del	0	0
yjm1385	0	0	0	0	0	0	0	0	0	0	0	0	0	0	0	0	0	0	0	0	40 Ins	0	0	0	0	0	0	0	0	0	1 Del	0	0	0	0	0	0	0	1 Del	0	0	0	0	0	0	0	1 Del	0	0
yjm1386	0	0	0	0	0	0	0	0	0	0	0	0	0	0	0	0	0	0	0	0	0	A -> T	0	0	0	0	0	0	0	0	1 Del	0	0	0	0	0	0	0	1 Del	0	0	0	0	0	0	0	1 Del	0	0
yjm1387	0	0	0	0	0	0	0	0	0	0	0	0	0	0	0	0	0	0	1 Ins	0	0	0	0	0	0	0	0	0	0	0	0	0	0	0	0	0	0	0	0	0	0	0	0	0	0	0	1 Del	0	0
yjm1388	A -> T	0	0	0	0	0	0	0	0	0	0	0	0	0	0	0	0	0	0	0	0	0	0	0	0	0	0	0	0	0	0	0	0	0	0	0	0	0	1 Del	0	0	0	0	0	0	0	1 Del	0	0
yjm1389	A -> T	0	0	0	0	0	0	0	0	0	0	0	0	0	0	0	0	0	0	0	0	0	0	0	0	0	0	0	0	0	1 Del	0	0	0	0	0	0	0	1 Del	0	0	0	0	0	0	0	1 Del	0	0
yjm1399	0	11 Del	0	1 Del	T -> A	1 Del	0	0	0	T -> G	A -> T	2 Ins	G -> A	3 Del	A -> T	0	2 Del	T -> A	0	1 Del	0	0	24 Del	0	T -> A	A -> T	T -> A	0	T -> A	T -> A	0	4 Del	T -> A	2 Del	A -> T	0	T -> A	T -> A	0	T -> A	1 Ins	A -> T	T -> A	A -> T	1 Del	0	1 Del	0	0
yjm1400	A -> T	0	0	0	0	0	0	0	0	0	0	0	0	0	0	0	0	0	0	0	0	A -> T	0	0	0	0	0	0	0	0	0	0	0	0	0	0	0	0	0	0	0	0	0	0	0	0	1 Del	0	0
yjm1401	0	0	0	0	0	0	0	0	0	0	0	0	0	0	0	0	0	0	0	0	0	0	0	0	0	0	0	0	0	0	0	0	0	0	0	0	0	0	0	0	0	0	0	0	0	0	1 Del	0	0
yjm1402	0	0	0	0	0	0	0	0	0	0	0	0	0	0	0	0	0	0	0	0	0	A -> T	0	0	0	0	0	0	0	0	0	0	0	0	0	0	0	0	0	0	0	0	0	0	0	0	1 Del	0	0
yjm1415	A -> T	0	0	0	0	0	0	0	0	0	0	0	0	0	0	0	0	0	1 Ins	0	0	0	0	4 Del	0	0	0	0	0	0	0	0	0	0	0	T -> A	0	0	1 Del	0	0	0	0	0	0	0	0	0	0
yjm1417	A -> T	0	0	0	0	0	0	0	0	0	0	0	0	0	0	0	0	0	1 Ins	0	0	0	0	0	0	3 Del	0	0	0	0	0	0	0	0	0	T -> A	0	0	1 Del	0	0	0	0	0	0	0	0	0	0
yjm1418	0	0	0	0	0	0	0	0	0	0	0	0	0	0	0	0	0	0	0	0	0	A -> T	0	0	0	0	0	0	0	0	0	0	0	0	0	T -> A	0	0	1 Del	0	0	0	0	0	0	0	1 Del	0	0
yjm1419	0	0	0	0	0	0	0	0	0	0	0	0	0	0	0	0	0	0	1 Ins	0	40 Ins	A -> T	0	0	0	0	0	0	0	0	0	0	0	0	0	0	0	0	0	0	0	0	0	0	0	0	1 Del	0	0
yjm1433	0	0	0	0	0	0	0	0	0	0	0	0	0	0	0	0	0	0	0	0	0	0	0	0	0	0	0	0	0	0	0	0	0	0	0	0	0	0	0	0	0	0	0	0	0	1 Del	0	0	0
yjm1434	0	0	0	0	0	0	0	0	0	0	0	0	0	0	0	0	0	0	0	0	0	0	0	0	0	0	0	0	0	0	0	0	0	0	0	0	0	0	0	0	0	0	0	0	0	0	1 Del	0	0
yjm1439	0	0	0	0	0	0	0	0	0	0	0	0	0	0	0	0	0	0	0	0	0	0	0	0	0	0	0	0	0	0	1 Ins	0	0	0	0	0	0	0	0	0	0	0	0	0	0	0	0	0	0
yjm1443	0	0	0	0	0	0	0	0	0	0	0	0	0	0	0	0	0	0	0	0	0	A -> T	0	0	0	0	0	0	0	0	0	0	0	0	0	0	0	0	0	0	0	0	0	0	0	0	1 Del	0	0
yjm1444	0	0	0	0	0	0	0	0	0	0	0	0	0	0	0	0	0	0	0	0	0	A -> T	0	0	0	0	0	0	0	0	1 Del	0	0	0	0	0	0	0	1 Del	0	0	0	0	0	0	0	1 Del	0	A -> G
yjm1447	0	0	1 Ins	0	0	0	0	0	0	0	0	0	0	0	0	0	0	0	1 Ins	0	0	0	0	0	0	3 Del	0	0	0	0	0	0	0	0	0	0	0	0	1 Del	0	0	0	0	0	0	0	1 Del	0	0
yjm1450	0	0	0	0	0	0	0	0	0	0	0	0	0	0	0	0	0	0	0	0	40 Ins	A -> T	0	0	0	0	0	0	0	0	0	0	0	0	0	0	0	0	0	0	0	0	0	0	0	0	1 Del	0	0
yjm1460	0	0	0	0	0	0	0	0	0	0	0	0	0	0	0	0	0	0	0	0	0	0	0	0	0	0	0	0	0	0	1 Del	0	0	0	0	0	0	0	1 Del	0	0	0	0	0	0	0	1 Del	0	0
yjm1463	0	0	0	0	0	0	0	0	0	0	0	0	0	0	0	0	0	0	0	0	0	A -> T	0	0	0	0	0	0	0	0	1 Del	0	0	0	0	0	0	0	1 Del	0	0	0	0	0	0	0	1 Del	0	0
yjm1477	0	0	0	0	0	0	0	T -> A	0	0	0	0	0	0	0	0	0	0	0	0	0	0	0	0	0	3 Del	0	0	0	0	0	0	0	0	0	T -> A	0	0	1 Del	0	0	0	0	0	0	0	0	0	0
yjm1478	0	0	0	0	0	0	0	0	0	0	0	0	0	0	0	0	0	0	0	0	0	0	0	0	0	0	0	0	0	0	0	0	0	0	0	0	0	0	0	0	0	0	0	0	0	0	0	0	0
yjm1479	A -> T	0	0	0	0	0	0	0	0	0	0	0	0	0	0	0	0	0	0	0	0	A -> T	0	0	0	0	0	0	0	0	0	0	0	0	0	0	0	0	0	0	0	0	0	0	0	0	1 Del	0	0
yjm1526	0	0	0	0	0	0	0	0	0	0	0	0	0	0	0	0	0	0	0	0	0	0	0	0	0	0	0	0	0	0	0	0	0	0	0	0	0	0	0	0	0	0	0	0	0	1 Del	0	0	0
yjm1527	0	0	0	0	0	0	0	0	0	0	0	0	0	0	0	0	0	0	0	0	0	A -> T	0	0	0	0	0	0	0	0	0	0	0	0	0	0	0	0	0	0	0	0	0	0	0	0	1 Del	0	0
yjm1549	0	0	0	0	0	0	0	0	0	0	0	0	0	0	0	0	0	0	0	0	40 Ins	0	0	0	0	0	0	0	0	0	1 Del	0	0	0	0	0	0	0	1 Del	0	0	0	0	0	0	0	1 Del	0	0
yjm1573	0	0	0	0	0	0	0	0	0	0	0	0	0	0	0	0	0	0	0	0	0	A -> T	0	0	0	0	0	0	0	0	0	0	0	0	0	0	0	0	0	0	0	0	0	0	0	0	1 Del	0	0
yjm1574	A -> T	0	0	0	0	0	0	T -> A	0	0	0	0	0	0	0	1 Del	0	0	0	0	0	0	0	0	0	3 Del	0	0	0	0	0	0	0	0	0	T -> A	0	0	1 Del	0	0	0	0	0	0	0	0	0	0
yjm1592	A -> T	0	0	0	0	0	0	0	0	0	0	0	0	0	0	0	0	0	0	0	0	0	0	0	0	0	0	0	0	0	1 Del	0	0	0	0	0	0	0	1 Del	0	0	0	0	0	0	0	1 Del	0	0
yjm1615	0	0	0	0	0	0	0	0	0	0	0	0	0	0	0	0	0	0	0	0	0	0	0	0	0	0	0	0	0	0	0	0	0	0	0	0	0	0	0	0	0	0	0	0	0	0	1 Del	0	0
yjm189	A -> T	0	0	0	0	0	0	0	0	0	0	0	0	0	0	0	0	0	1 Ins	0	0	0	0	4 Del	0	0	0	0	0	0	0	0	0	0	0	T -> A	0	0	1 Del	0	0	0	0	0	0	1 Del	0	0	0
yjm193	0	0	0	0	0	0	0	0	0	0	0	0	0	0	0	0	0	0	0	0	142 Ins	0	0	0	0	0	0	0	0	0	1 Del	0	0	0	0	0	0	0	1 Del	0	0	0	0	0	0	0	1 Del	0	0
yjm195	0	0	0	0	0	0	0	0	0	0	0	0	0	0	0	0	0	0	0	0	0	0	0	0	0	0	0	0	0	0	1 Ins	0	0	0	0	0	0	0	0	0	0	0	0	0	0	0	1 Del	0	0
yjm244	A -> T	0	0	0	0	0	0	0	0	0	0	0	0	0	0	0	0	0	0	0	0	0	0	0	0	0	0	0	0	0	0	0	0	0	0	0	0	0	0	0	0	0	0	0	0	1 Del	0	0	0
yjm248	0	0	0	0	0	0	T -> A	T -> A	0	0	0	0	0	0	0	0	0	0	0	0	0	0	0	0	0	3 Del	0	0	0	0	0	0	0	0	0	T -> A	0	0	1 Del	0	0	0	0	0	0	0	0	0	0
yjm270	A -> T	0	0	0	0	0	0	T -> A	1 Ins	0	0	0	0	0	0	1 Del	0	0	0	0	0	0	0	0	0	3 Del	0	0	0	0	0	0	0	0	0	T -> A	0	0	1 Del	0	0	0	0	0	0	0	0	0	0
yjm271	0	0	0	0	0	0	0	0	0	0	0	0	0	0	0	0	0	0	0	0	40 Ins	0	0	0	0	0	0	0	0	0	1 Del	0	0	0	0	0	0	0	1 Del	0	0	0	0	0	0	0	1 Del	0	0
yjm320	0	0	0	0	0	0	0	0	0	0	0	0	0	0	0	0	0	0	0	0	0	A -> T	0	0	0	0	0	0	0	0	0	0	0	0	0	0	0	0	0	0	0	0	0	0	0	0	1 Del	0	0
yjm326	A -> T	0	0	0	0	0	0	0	0	0	0	0	0	0	0	0	0	0	1 Ins	0	0	0	0	4 Del	0	0	0	0	0	0	0	0	0	0	0	T -> A	0	0	1 Del	0	0	0	0	0	0	1 Del	0	0	0
yjm428	0	0	0	0	0	0	0	T -> A	0	0	0	0	0	0	0	0	0	0	0	0	0	0	0	0	0	3 Del	0	0	0	0	0	0	0	0	0	T -> A	0	0	1 Del	0	0	0	0	0	0	0	0	0	0
yjm450	0	0	0	0	0	0	0	0	0	0	0	0	0	0	0	0	0	0	0	0	40 Ins	A -> T	0	0	0	0	0	0	0	0	0	0	0	0	0	0	0	0	0	0	0	0	0	0	0	0	1 Del	0	0
yjm451	0	0	0	0	0	0	0	0	0	0	0	0	0	0	0	0	0	0	0	0	0	0	0	0	0	0	0	0	0	0	0	0	0	0	0	0	0	0	0	0	0	0	0	0	0	0	1 Del	0	0
yjm453	A -> T	0	0	0	0	0	0	0	0	0	0	0	0	0	0	0	0	0	1 Ins	0	0	0	0	4 Del	0	0	0	0	0	0	0	0	0	0	0	T -> A	0	0	1 Del	0	0	0	0	0	0	1 Del	0	0	0
yjm456	0	0	0	0	0	0	0	0	0	0	0	0	0	0	0	0	0	0	0	0	0	A -> T	0	0	0	0	0	0	0	0	0	0	0	0	0	0	0	0	0	0	0	0	0	0	0	0	1 Del	0	0
yjm470	0	0	0	0	0	0	0	0	0	0	0	0	0	0	0	0	0	0	0	0	0	0	0	0	0	0	0	0	0	0	0	0	0	0	0	0	0	0	0	0	0	0	0	0	0	0	1 Del	0	0
yjm541	0	0	0	0	0	0	0	0	0	0	0	0	0	0	0	0	0	0	0	0	0	A -> T	0	0	0	0	0	0	0	0	0	0	0	0	0	0	0	0	0	0	0	0	0	0	0	0	1 Del	0	0
yjm554	0	0	0	0	0	0	0	0	0	0	0	0	0	0	0	0	0	0	0	0	0	A -> T	0	0	0	0	0	0	0	0	0	0	0	0	0	0	0	0	0	0	0	0	0	0	0	0	1 Del	0	0
yjm555	0	0	0	0	0	0	0	0	0	0	0	0	0	0	0	0	0	0	0	0	0	A -> T	0	0	0	0	0	0	0	0	0	0	0	0	0	0	0	0	0	0	0	0	0	0	0	0	1 Del	0	0
yjm627	0	0	0	0	0	0	0	0	0	0	0	0	0	0	0	0	0	0	0	0	0	0	0	0	0	0	0	0	0	0	1 Ins	0	0	0	0	0	0	0	0	0	0	0	0	0	0	0	0	0	0
yjm681	0	0	0	0	0	0	0	0	0	0	0	0	0	0	0	0	0	0	0	0	40 Ins	0	0	0	0	0	0	0	0	0	0	0	0	0	0	0	0	0	0	0	0	0	0	0	0	0	1 Del	A -> G	0
yjm682	A -> T	0	0	0	0	0	0	0	0	0	0	0	0	0	0	0	0	0	1 Ins	0	0	0	0	4 Del	0	0	0	0	0	0	0	0	0	0	0	T -> A	0	0	1 Del	0	0	0	0	0	0	1 Del	0	0	0
yjm683	A -> T	0	0	0	0	0	0	0	0	0	0	0	0	0	0	0	0	0	1 Ins	0	0	0	0	4 Del	0	0	0	0	0	0	0	0	0	0	0	T -> A	0	0	1 Del	0	0	0	0	0	0	1 Del	0	0	0
yjm689	A -> T	0	0	0	0	0	0	0	0	0	0	0	0	0	0	0	0	0	0	0	40 Ins	0	0	0	0	0	0	0	0	0	0	0	0	0	0	0	0	0	0	0	0	0	0	0	0	0	1 Del	A -> G	0
yjm693	0	0	0	0	0	0	0	0	0	0	0	0	0	0	0	0	0	0	0	0	40 Ins	0	0	0	0	0	0	0	0	0	0	0	0	0	0	0	0	0	0	0	0	0	0	0	0	1 Del	0	0	0
yjm969	A -> T	0	0	0	0	0	0	0	0	0	0	0	0	0	0	0	0	0	0	0	0	0	0	0	0	0	0	0	0	0	0	0	0	0	0	0	0	0	0	0	0	0	0	0	0	1 Del	0	0	0
yjm972	A -> T	0	0	0	0	0	0	0	0	0	0	0	0	0	0	0	0	0	0	0	0	0	0	0	0	0	0	0	0	0	0	0	0	0	0	0	0	0	0	0	0	0	0	0	0	1 Del	0	0	0
yjm975	A -> T	0	0	0	0	0	0	0	0	0	0	0	0	0	0	0	0	0	0	0	0	0	0	0	0	0	0	0	0	0	0	0	0	0	0	0	0	0	0	0	0	0	0	0	0	1 Del	0	0	0
yjm978	A -> T	0	0	0	0	0	0	0	0	0	0	0	0	0	0	0	0	0	0	0	0	0	0	0	0	0	0	0	0	0	0	0	0	0	0	0	0	0	0	0	0	0	0	0	0	1 Del	0	0	0
yjm981	A -> T	0	0	0	0	0	0	0	0	0	0	0	0	0	0	0	0	0	0	0	0	0	0	0	0	0	0	0	0	0	0	0	0	0	0	0	0	0	0	0	0	0	0	0	0	1 Del	0	0	0
yjm984	A -> T	0	0	0	0	0	0	0	0	0	0	0	0	0	0	0	0	0	0	0	0	0	0	0	0	0	0	0	0	0	0	0	0	0	0	0	0	0	0	0	0	0	0	0	0	1 Del	0	0	0
yjm987	A -> T	0	0	0	0	0	0	0	0	0	0	0	0	0	0	0	0	0	0	0	0	0	0	0	0	0	0	0	0	0	0	0	0	0	0	0	0	0	0	0	0	0	0	0	0	1 Del	0	0	0
yjm990	A -> T	0	0	0	0	0	0	0	0	0	0	0	0	0	0	0	0	0	0	0	0	0	0	0	0	0	0	0	0	0	0	0	0	0	0	0	0	0	0	0	0	0	0	0	0	1 Del	0	0	0
yjm993	A -> T	0	0	0	0	0	0	0	0	0	0	0	0	0	0	0	0	0	0	0	0	0	0	0	0	0	0	0	0	0	0	0	0	0	0	0	0	0	0	0	0	0	0	0	0	1 Del	0	0	0
yjm996	A -> T	0	0	0	0	0	0	0	0	0	0	0	0	0	0	0	0	0	0	0	0	0	0	0	0	0	0	0	0	0	0	0	0	0	0	0	0	0	0	0	0	0	0	0	0	1 Del	0	0	0
SK1	0	0	0	0	0	0	0	0	0	0	0	0	0	0	0	0	0	0	0	0	0	0	0	0	0	0	0	1 Ins	0	0	0	0	0	0	0	0	0	0	0	0	0	0	0	0	0	0	0	0	0
YJM789	0	0	0	0	0	0	0	0	0	0	0	0	0	0	0	0	0	0	0	0	0	A -> T	0	0	0	0	0	0	0	0	0	0	0	0	0	0	0	0	0	0	0	0	0	0	0	0	1 Del	0	0
[truncated: 9 more columns]

## Sheet: RPM1
Position	57	63	64	70	79	80	86	90	94	99	103	105	111	116	117	123	124	126	127	129	131	132	138	140	142	149	151	152	157	158	163	164	168	169	170	171	174	175	176	178	179	180	182	184	187	189	190	192	193
yjm1078	0	0	0	0	0	0	0	0	0	0	0	0	0	0	1 Del	0	0	G -> A	0	G -> T	0	0	0	0	0	0	0	0	0	0	0	0	0	0	A -> T	6 Ins	0	0	0	0	0	0	0	0	0	T -> A	0	0	0
yjm1083	0	0	0	0	0	0	0	0	0	0	0	0	0	0	1 Del	0	0	0	0	0	0	0	0	0	17 Del	0	0	0	0	0	0	0	0	6 Ins	0	0	0	0	0	0	0	0	0	0	0	0	0	0	0
yjm1129	0	0	0	0	0	0	0	0	0	0	0	0	0	0	1 Del	0	0	G -> A	0	G -> T	0	0	0	0	0	0	0	0	0	0	7 Ins	0	0	0	A -> T	0	0	0	0	0	0	0	0	0	0	T -> A	0	0	0
yjm1133	0	0	0	0	0	0	0	0	0	0	0	0	0	0	0	0	0	0	0	0	0	0	0	0	0	0	0	0	0	0	0	0	0	0	0	0	0	0	0	0	0	0	0	0	0	0	0	0	0
yjm1190	0	0	0	0	0	0	0	0	0	0	0	0	0	0	1 Del	0	0	0	0	0	0	0	0	0	17 Del	0	0	0	0	0	0	0	0	6 Ins	0	0	0	0	0	0	0	0	0	0	0	0	0	0	0
yjm1199	0	0	0	0	0	0	0	0	0	0	0	0	0	0	1 Del	0	0	0	0	0	0	0	0	0	17 Del	0	0	0	0	0	0	0	0	6 Ins	0	0	0	0	0	0	0	0	0	0	0	0	0	0	0
yjm1202	0	0	0	0	0	0	0	0	0	0	0	0	0	0	1 Del	0	0	0	0	0	0	0	0	0	17 Del	0	0	0	0	0	0	0	0	6 Ins	0	0	0	0	0	0	0	0	0	0	0	0	0	0	0
yjm1208	0	0	0	0	0	0	0	0	0	0	0	0	0	0	1 Del	0	0	G -> A	0	G -> T	0	0	0	0	0	0	0	0	0	0	0	0	0	0	0	0	G -> A	0	0	0	0	0	0	0	0	0	0	0	0
yjm1242	0	0	0	0	0	0	0	0	0	0	0	0	0	0	0	0	0	0	0	0	0	0	0	0	0	0	0	0	0	0	0	0	0	0	0	0	0	0	0	0	0	0	0	0	0	0	0	0	0
yjm1244	0	0	0	0	0	0	0	0	0	0	0	0	0	0	1 Del	0	0	G -> A	0	G -> T	0	0	0	0	0	0	0	0	0	0	0	0	0	0	A -> T	6 Ins	0	0	0	0	0	0	0	0	0	T -> A	0	0	0
yjm1248	0	0	0	0	0	0	0	0	0	0	0	0	0	0	1 Del	0	0	G -> A	0	G -> T	0	0	0	0	0	0	0	0	0	0	0	0	0	0	A -> T	6 Ins	0	0	0	0	0	0	0	0	0	0	0	0	0
yjm1250	0	0	0	0	0	0	0	0	0	0	0	0	0	0	1 Del	0	0	0	0	0	0	0	0	0	17 Del	0	0	0	0	0	0	0	0	6 Ins	0	0	0	0	0	0	0	0	0	0	0	0	0	0	0
yjm1252	0	0	0	0	0	0	0	0	0	0	0	0	0	0	0	0	0	0	0	0	0	0	0	0	0	0	0	0	0	0	0	0	0	0	0	0	0	0	0	0	0	0	0	0	0	0	0	0	0
yjm1273	0	0	0	0	0	0	0	0	0	0	0	0	0	0	1 Del	0	0	0	0	0	0	0	0	0	17 Del	0	0	0	0	0	0	0	0	6 Ins	0	0	0	0	0	0	0	0	0	0	0	0	0	0	0
yjm1304	0	0	0	0	0	0	0	0	0	0	0	0	0	0	1 Del	0	0	G -> A	0	G -> T	0	0	0	0	0	0	0	0	0	0	0	0	0	6 Ins	0	0	G -> A	0	0	0	0	0	0	0	0	0	0	0	0
yjm1307	0	0	0	0	0	0	0	0	0	0	0	0	0	0	0	0	0	0	0	0	0	0	0	0	0	0	0	0	0	0	0	0	0	0	0	0	0	0	0	0	0	0	0	0	0	0	0	0	0
yjm1311	0	0	0	0	0	0	0	0	0	0	0	0	0	0	1 Del	0	0	G -> A	0	G -> T	0	0	0	0	0	0	0	0	0	0	0	0	0	0	0	0	G -> A	0	0	0	0	0	0	0	0	0	0	0	0
yjm1326	0	0	0	0	0	0	0	0	0	0	0	0	0	0	1 Del	0	0	G -> A	0	G -> T	0	0	0	0	0	0	0	0	0	0	0	0	0	6 Ins	0	0	G -> A	0	0	0	0	0	0	0	0	0	0	0	0
yjm1332	0	0	0	0	0	0	0	0	0	0	0	0	0	0	1 Del	0	0	G -> A	0	G -> T	0	0	0	0	0	0	0	0	0	0	0	0	0	0	A -> T	6 Ins	0	0	0	0	0	0	0	0	0	T -> A	0	0	0
yjm1336	0	0	0	0	0	0	0	0	0	0	0	0	0	0	1 Del	0	0	G -> A	0	G -> T	0	0	0	0	0	0	0	0	0	0	0	0	0	0	A -> T	6 Ins	0	0	0	0	0	0	0	0	0	T -> A	0	0	0
yjm1338	0	0	0	0	0	0	0	0	0	0	0	0	0	0	0	0	0	0	0	0	0	0	0	0	0	0	0	0	0	0	0	0	0	0	0	0	0	0	0	0	0	0	0	0	0	0	0	0	0
yjm1341	0	0	0	0	0	0	0	0	0	0	0	0	0	0	1 Del	0	0	G -> A	0	G -> T	0	0	0	0	0	0	0	0	0	0	0	0	0	0	A -> T	6 Ins	0	0	0	0	0	0	0	0	0	T -> A	0	0	0
yjm1342	0	0	0	0	0	0	0	0	0	0	0	0	0	0	1 Del	0	0	G -> A	0	G -> T	0	0	0	0	0	0	0	0	0	0	0	0	0	6 Ins	0	0	G -> A	0	0	0	0	0	0	0	0	0	0	0	0
yjm1355	0	0	0	0	0	0	0	0	0	0	0	0	0	0	1 Del	0	0	G -> A	0	G -> T	0	0	0	0	0	0	0	0	0	0	0	0	0	0	0	0	G -> A	0	0	0	0	0	0	0	0	0	0	0	0
yjm1356	0	0	0	0	0	0	0	0	0	0	0	0	0	0	0	0	0	0	0	0	0	0	0	0	0	0	0	0	0	0	0	0	0	0	0	0	0	0	0	0	0	0	0	0	0	0	0	0	0
yjm1381	0	0	0	0	0	0	0	0	0	0	0	0	0	0	1 Del	0	0	0	0	0	0	0	0	0	17 Del	0	0	0	0	0	0	0	0	6 Ins	0	0	0	0	0	0	0	0	0	0	0	0	0	0	0
yjm1383	0	0	0	0	0	0	0	0	0	0	0	0	0	0	1 Del	0	0	G -> A	0	G -> T	0	0	0	0	0	0	0	0	0	0	0	0	0	0	0	0	G -> A	0	0	0	0	0	0	0	0	0	0	0	0
yjm1385	0	A -> C	39 Ins	0	0	0	0	0	0	0	0	0	0	0	1 Del	0	0	G -> A	0	G -> T	0	0	0	0	0	0	0	0	0	0	0	0	0	0	0	0	G -> A	0	0	0	0	0	0	0	0	0	0	0	0
yjm1386	0	0	0	0	0	0	0	0	0	0	0	0	0	0	1 Del	0	0	G -> A	0	G -> T	0	0	0	0	0	0	0	0	0	0	0	0	0	6 Ins	0	0	0	0	0	0	0	0	0	0	0	0	0	0	0
yjm1387	0	0	0	0	0	0	0	0	0	0	0	0	0	0	1 Del	0	0	G -> A	0	G -> T	0	0	0	0	0	0	0	0	0	0	0	0	0	6 Ins	0	0	0	0	0	0	0	0	0	0	0	0	0	0	0
yjm1388	0	0	0	0	0	0	0	0	0	0	0	0	0	0	1 Del	0	0	G -> A	0	G -> T	0	0	0	0	0	0	0	0	0	0	0	0	0	0	0	0	G -> A	0	0	0	0	0	0	0	0	0	0	0	0
yjm1389	0	0	0	0	0	0	0	0	0	0	0	0	0	0	1 Del	0	0	G -> A	0	G -> T	0	0	0	0	0	0	0	0	0	0	0	0	0	0	0	0	G -> A	0	0	0	0	0	0	0	0	0	0	0	0
yjm1399	A -> T	0	0	7 Ins	T -> A	A -> T	T -> A	1 Del	1 Del	A -> T	C -> A	T -> A	G -> T	1 Ins	0	T -> A	C -> A	G -> A	3 Ins	G -> C	A -> T	T -> A	G -> T	T -> A	G -> A	A -> C	T -> A	T -> A	A -> T	G -> A	0	3 Del	11 Ins	0	A -> C	A -> C	G -> C	T -> C	C -> A	T -> C	T -> C	A -> C	A -> G	A -> G	T -> C	0	3 Del	T -> G	T -> C
yjm1400	0	0	0	0	0	0	0	0	0	0	0	0	0	0	1 Del	0	0	G -> A	0	G -> T	0	0	0	0	0	0	0	0	0	0	0	0	0	6 Ins	0	0	G -> A	0	0	0	0	0	0	0	0	0	0	0	0
yjm1401	0	0	0	0	0	0	0	0	0	0	0	0	0	0	1 Del	0	0	G -> A	0	G -> T	0	0	0	0	0	0	0	0	0	0	0	0	0	6 Ins	0	0	G -> A	0	0	0	0	0	0	0	0	0	0	0	0
yjm1402	0	0	0	0	0	0	0	0	0	0	0	0	0	0	1 Del	0	0	G -> A	0	G -> T	0	0	0	0	0	0	0	0	0	0	0	0	0	6 Ins	0	0	G -> A	0	0	0	0	0	0	0	0	0	0	0	0
yjm1415	0	0	0	0	0	0	0	0	0	0	0	0	0	0	0	0	0	0	0	0	0	0	0	0	0	0	0	0	0	0	0	0	0	0	0	0	0	0	0	0	0	0	0	0	0	0	0	0	0
yjm1417	0	0	0	0	0	0	0	0	0	0	0	0	0	0	1 Del	0	0	G -> A	0	G -> T	0	0	0	0	0	0	0	0	0	0	0	0	0	0	A -> T	6 Ins	0	0	0	0	0	0	0	0	0	T -> A	0	0	0
yjm1418	0	0	0	0	0	0	0	0	0	0	0	0	0	0	1 Del	0	0	G -> A	0	G -> T	0	0	0	0	0	0	0	0	0	0	0	0	0	6 Ins	0	0	0	0	0	0	0	0	0	0	0	0	0	0	0
yjm1419	0	0	0	0	0	0	0	0	0	0	0	0	0	0	1 Del	0	0	G -> A	0	G -> T	0	0	0	0	0	0	0	0	0	0	0	0	0	0	0	0	G -> A	0	0	0	0	0	0	0	0	0	0	0	0
yjm1433	0	0	0	0	0	0	0	0	0	0	0	0	0	0	0	0	0	0	0	0	0	0	0	0	G -> A	0	0	0	0	0	0	0	0	6 Ins	0	0	0	0	0	0	0	0	0	0	0	0	0	0	0
yjm1434	0	0	0	0	0	0	0	0	0	0	0	0	0	0	1 Del	0	0	0	0	0	0	0	0	0	17 Del	0	0	0	0	0	0	0	0	6 Ins	0	0	0	0	0	0	0	0	0	0	0	0	0	0	0
yjm1439	0	0	0	0	0	0	0	0	0	0	0	0	0	0	1 Del	0	0	G -> A	0	G -> T	0	0	0	0	0	0	0	0	0	0	0	0	0	0	A -> T	6 Ins	0	0	0	0	0	0	0	0	0	0	0	0	0
yjm1443	0	0	0	0	0	0	0	0	0	0	0	0	0	0	1 Del	0	0	0	0	0	0	0	0	0	17 Del	0	0	0	0	0	0	0	0	6 Ins	0	0	0	0	0	0	0	0	0	0	0	0	0	0	0
yjm1444	0	A -> C	39 Ins	0	0	0	0	0	0	0	0	0	0	0	1 Del	0	0	G -> A	0	G -> T	0	0	0	0	0	0	0	0	0	0	0	0	0	0	A -> T	6 Ins	0	0	0	0	0	0	0	0	0	0	0	0	0
yjm1447	0	0	0	0	0	0	0	0	0	0	0	0	0	0	1 Del	0	0	G -> A	0	G -> T	0	0	0	0	0	0	0	0	0	0	0	0	0	6 Ins	0	0	0	0	0	0	0	0	0	0	0	0	0	0	0
yjm1450	0	0	0	0	0	0	0	0	0	0	0	0	0	0	1 Del	0	0	G -> A	0	G -> T	0	0	0	0	0	0	0	0	0	0	0	0	0	6 Ins	0	0	G -> A	0	0	0	0	0	0	0	0	0	0	0	0
yjm1460	0	0	0	0	0	0	0	0	0	0	0	0	0	0	1 Del	0	0	G -> A	0	G -> T	0	0	0	0	0	0	0	0	0	0	0	0	0	0	0	0	G -> A	0	0	0	0	0	0	0	0	0	0	0	0
yjm1463	0	0	0	0	0	0	0	0	0	0	0	0	0	0	0	0	0	0	0	0	0	0	0	0	0	0	0	0	0	0	0	0	0	6 Ins	0	0	0	0	0	0	0	0	0	0	0	0	0	0	0
yjm1477	0	0	0	0	0	0	0	0	0	0	0	0	0	0	0	0	0	0	0	0	0	0	0	0	0	0	0	0	0	0	0	0	0	0	0	0	0	0	0	0	0	0	0	0	0	0	0	0	0
yjm1478	0	0	0	0	0	0	0	0	0	0	0	0	0	0	0	0	0	0	0	0	0	0	0	0	0	0	0	0	0	0	0	0	0	0	0	0	0	0	0	0	0	0	0	0	0	0	0	0	0
yjm1479	0	0	0	0	0	0	0	0	0	0	0	0	0	0	1 Del	0	0	G -> A	0	G -> T	0	0	0	0	0	0	0	0	0	0	0	0	0	6 Ins	0	0	G -> A	0	0	0	0	0	0	0	0	0	0	0	0
yjm1526	0	0	0	0	0	0	0	0	0	0	0	0	0	0	1 Del	0	0	G -> A	0	G -> T	0	0	0	0	0	0	0	0	0	0	7 Ins	0	0	0	A -> T	0	0	0	0	0	0	0	0	0	0	T -> A	0	0	0
yjm1527	0	0	0	0	0	0	0	0	0	0	0	0	0	0	1 Del	0	0	G -> A	0	G -> T	0	0	0	0	0	0	0	0	0	0	0	0	0	0	A -> T	6 Ins	0	0	0	0	0	0	0	0	0	0	0	0	0
yjm1549	0	0	0	0	0	0	0	0	0	0	0	0	0	0	1 Del	0	0	G -> A	0	G -> T	0	0	0	0	0	0	0	0	0	0	0	0	0	0	0	0	G -> A	0	0	0	0	0	0	0	0	0	0	0	0
yjm1573	0	0	0	0	0	0	0	0	0	0	0	0	0	0	1 Del	0	0	G -> A	0	G -> T	0	0	0	0	0	0	0	0	0	0	0	0	0	6 Ins	0	0	G -> A	0	0	0	0	0	0	0	0	0	0	0	0
yjm1574	0	0	0	0	0	0	0	0	0	0	0	0	0	0	1 Del	0	0	G -> A	0	G -> T	0	0	0	0	0	0	0	0	0	0	7 Ins	0	0	0	A -> T	0	0	0	0	0	0	0	0	0	0	T -> A	0	0	0
yjm1592	0	0	0	0	0	0	0	0	0	0	0	0	0	0	1 Del	0	0	G -> A	0	G -> T	0	0	0	0	0	0	0	0	0	0	0	0	0	0	0	0	G -> A	0	0	0	0	0	0	0	0	0	0	0	0
yjm1615	0	0	0	0	0	0	0	0	0	0	0	0	0	0	1 Del	0	0	G -> A	0	G -> T	0	0	0	0	0	0	0	0	0	0	0	0	0	0	0	0	G -> A	0	0	0	0	0	0	0	0	0	0	0	0
yjm189	0	0	0	0	0	0	0	0	0	0	0	0	0	0	0	0	0	0	0	0	0	0	0	0	G -> A	0	0	0	0	0	0	0	0	6 Ins	0	0	0	0	0	0	0	0	0	0	0	0	0	0	0
yjm193	0	0	0	0	0	0	0	0	0	0	0	0	0	0	0	0	0	0	0	0	0	0	0	0	0	0	0	0	0	0	0	0	0	0	0	0	0	0	0	0	0	0	0	0	0	0	0	0	0
yjm195	0	0	0	0	0	0	0	0	0	0	0	0	0	0	1 Del	0	0	0	0	0	0	0	0	0	17 Del	0	0	0	0	0	0	0	0	6 Ins	0	0	0	0	0	0	0	0	0	0	0	0	0	0	0
yjm244	0	0	0	0	0	0	0	0	0	0	0	0	0	0	0	0	0	0	0	0	0	0	0	0	0	0	0	0	0	0	0	0	0	0	0	0	0	0	0	0	0	0	0	0	0	0	0	0	0
yjm248	0	0	0	0	0	0	0	0	0	0	0	0	0	0	0	0	0	0	0	0	0	0	0	0	G -> A	0	0	0	0	0	0	0	0	6 Ins	0	0	0	0	0	0	0	0	0	0	0	0	0	0	0
yjm270	0	0	0	0	0	0	0	0	0	0	0	0	0	0	1 Del	0	0	G -> A	0	G -> T	0	0	0	0	0	0	0	0	0	0	7 Ins	0	0	0	A -> T	0	0	0	0	0	0	0	0	0	0	T -> A	0	0	0
yjm271	0	0	0	0	0	0	0	0	0	0	0	0	0	0	0	0	0	0	0	0	0	0	0	0	0	0	0	0	0	0	0	0	0	0	0	0	0	0	0	0	0	0	0	0	0	0	0	0	0
yjm320	0	0	0	0	0	0	0	0	0	0	0	0	0	0	1 Del	0	0	G -> A	0	G -> T	0	0	0	0	0	0	0	0	0	0	0	0	0	6 Ins	0	0	G -> A	0	0	0	0	0	0	0	0	0	0	0	0
yjm326	0	0	0	0	0	0	0	0	0	0	0	0	0	0	0	0	0	0	0	0	0	0	0	0	0	0	0	0	0	0	0	0	0	0	0	0	0	0	0	0	0	0	0	0	0	0	0	0	0
yjm428	0	0	0	0	0	0	0	0	0	0	0	0	0	0	1 Del	0	0	G -> A	0	G -> T	0	0	0	0	0	0	0	0	0	0	0	0	0	0	A -> T	6 Ins	0	0	0	0	0	0	0	0	0	T -> A	0	0	0
yjm450	0	0	0	0	0	0	0	0	0	0	0	0	0	0	1 Del	0	0	G -> A	0	G -> T	0	0	0	0	0	0	0	0	0	0	0	0	0	6 Ins	0	0	G -> A	0	0	0	0	0	0	0	0	0	0	0	0
yjm451	0	0	0	0	0	0	0	0	0	0	0	0	0	0	1 Del	0	0	G -> A	0	G -> T	0	0	0	0	0	0	0	0	0	0	0	0	0	0	A -> T	6 Ins	0	0	0	0	0	0	0	0	0	0	0	0	0
yjm453	0	0	0	0	0	0	0	0	0	0	0	0	0	0	0	0	0	0	0	0	0	0	0	0	G -> A	0	0	0	0	0	0	0	0	6 Ins	0	0	0	0	0	0	0	0	0	0	0	0	0	0	0
yjm456	0	0	0	0	0	0	0	0	0	0	0	0	0	0	1 Del	0	0	G -> A	0	G -> T	0	0	0	0	0	0	0	0	0	0	0	0	0	6 Ins	0	0	G -> A	0	0	0	0	0	0	0	0	0	0	0	0
yjm470	0	0	0	0	0	0	0	0	0	0	0	0	0	0	1 Del	0	0	0	0	0	0	0	0	0	17 Del	0	0	0	0	0	0	0	0	6 Ins	0	0	0	0	0	0	0	0	0	0	0	0	0	0	0
yjm541	0	0	0	0	0	0	0	0	0	0	0	0	0	0	1 Del	0	0	G -> A	0	G -> T	0	0	0	0	0	0	0	0	0	0	0	0	0	6 Ins	0	0	G -> A	0	0	0	0	0	0	0	0	0	0	0	0
yjm554	0	0	0	0	0	0	0	0	0	0	0	0	0	0	1 Del	0	0	G -> A	0	G -> T	0	0	0	0	0	0	0	0	0	0	0	0	0	6 Ins	0	0	G -> A	0	0	0	0	0	0	0	0	0	0	0	0
yjm555	0	0	0	0	0	0	0	0	0	0	0	0	0	0	1 Del	0	0	G -> A	0	G -> T	0	0	0	0	0	0	0	0	0	0	0	0	0	6 Ins	0	0	G -> A	0	0	0	0	0	0	0	0	0	0	0	0
yjm627	0	0	0	0	0	0	0	0	0	0	0	0	0	0	1 Del	0	0	G -> A	0	G -> T	0	0	0	0	0	0	0	0	0	0	0	0	0	0	A -> T	6 Ins	0	0	0	0	0	0	0	0	0	0	0	0	0
yjm681	0	0	0	0	0	0	0	0	0	0	0	0	0	0	1 Del	0	0	G -> A	0	G -> T	0	0	0	0	0	0	0	0	0	0	0	0	0	0	0	0	G -> A	0	0	0	0	0	0	0	0	0	0	0	0
yjm682	0	0	0	0	0	0	0	0	0	0	0	0	0	0	0	0	0	0	0	0	0	0	0	0	0	0	0	0	0	0	0	0	0	0	0	0	0	0	0	0	0	0	0	0	0	0	0	0	0
yjm683	0	0	0	0	0	0	0	0	0	0	0	0	0	0	0	0	0	0	0	0	0	0	0	0	0	0	0	0	0	0	0	0	0	0	0	0	0	0	0	0	0	0	0	0	0	0	0	0	0
yjm689	0	0	0	0	0	0	0	0	0	0	0	0	0	0	1 Del	0	0	0	0	0	0	0	0	0	17 Del	0	0	0	0	0	0	0	0	6 Ins	0	0	0	0	0	0	0	0	0	0	0	0	0	0	0
yjm693	0	0	0	0	0	0	0	0	0	0	0	0	0	0	1 Del	0	0	0	0	0	0	0	0	0	17 Del	0	0	0	0	0	0	0	0	6 Ins	0	0	0	0	0	0	0	0	0	0	0	0	0	0	0
yjm969	0	0	0	0	0	0	0	0	0	0	0	0	0	0	1 Del	0	0	G -> A	0	G -> T	0	0	0	0	0	0	0	0	0	0	0	0	0	0	A -> T	6 Ins	0	0	0	0	0	0	0	0	0	T -> A	0	0	0
yjm972	0	0	0	0	0	0	0	0	0	0	0	0	0	0	1 Del	0	0	G -> A	0	G -> T	0	0	0	0	0	0	0	0	0	0	0	0	0	0	A -> T	6 Ins	0	0	0	0	0	0	0	0	0	T -> A	0	0	0
yjm975	0	0	0	0	0	0	0	0	0	0	0	0	0	0	1 Del	0	0	G -> A	0	G -> T	0	0	0	0	0	0	0	0	0	0	0	0	0	0	A -> T	6 Ins	0	0	0	0	0	0	0	0	0	T -> A	0	0	0
yjm978	0	0	0	0	0	0	0	0	0	0	0	0	0	0	1 Del	0	0	G -> A	0	G -> T	0	0	0	0	0	0	0	0	0	0	0	0	0	0	A -> T	6 Ins	0	0	0	0	0	0	0	0	0	T -> A	0	0	0
yjm981	0	0	0	0	0	0	0	0	0	0	0	0	0	0	1 Del	0	0	G -> A	0	G -> T	0	0	0	0	0	0	0	0	0	0	0	0	0	0	A -> T	6 Ins	0	0	0	0	0	0	0	0	0	T -> A	0	0	0
yjm984	0	0	0	0	0	0	0	0	0	0	0	0	0	0	1 Del	0	0	G -> A	0	G -> T	0	0	0	0	0	0	0	0	0	0	0	0	0	0	A -> T	6 Ins	0	0	0	0	0	0	0	0	0	T -> A	0	0	0
yjm987	0	0	0	0	0	0	0	0	0	0	0	0	0	0	1 Del	0	0	G -> A	0	G -> T	0	0	0	0	0	0	0	0	0	0	0	0	0	0	A -> T	6 Ins	0	0	0	0	0	0	0	0	0	T -> A	0	0	0
yjm990	0	0	0	0	0	0	0	0	0	0	0	0	0	0	1 Del	0	0	G -> A	0	G -> T	0	0	0	0	0	0	0	0	0	0	0	0	0	0	A -> T	6 Ins	0	0	0	0	0	0	0	0	0	T -> A	0	0	0
yjm993	0	0	0	0	0	0	0	0	0	0	0	0	0	0	1 Del	0	0	G -> A	0	G -> T	0	0	0	0	0	0	0	0	0	0	0	0	0	0	A -> T	6 Ins	0	0	0	0	0	0	0	0	0	T -> A	0	0	0
yjm996	0	0	0	0	0	0	0	0	0	0	0	0	0	0	1 Del	0	0	G -> A	0	G -> T	0	0	0	0	0	0	0	0	0	0	0	0	0	0	A -> T	6 Ins	0	0	0	0	0	0	0	0	0	T -> A	0	0	0
SK1	0	0	0	0	0	0	0	0	0	0	0	0	0	0	1 Del	0	0	0	0	0	0	0	0	0	0	0	0	0	0	0	0	0	0	6 Ins	A -> T	0	0	0	0	0	0	0	0	0	0	0	0	0	0
YJM789	0	0	0	0	0	0	0	0	0	0	0	0	0	0	1 Del	0	0	G -> A	0	G -> T	0	0	0	0	0	0	0	0	0	0	0	0	0	6 Ins	0	0	G -> A	0	0	0	0	0	0	0	0	0	0	0	0
[truncated: 35 more columns]

## Sheet: tRNA
tRNAs	in 96 strains					tI(GAU)Q
tA(UGC)Q	identical					yjm1615_mito	60 C > T
tC(GCA)Q	identical					yjm1447_mito	64 G > A
tD(GUC)Q	identical					yjm1208_mito	60 C > T
tE(UUC)Q	identical
tF(GAA)Q	identical					tM(CAU)Q1
tG(UCC)Q	identical					yjm1399_mito	1 G > T
tH(GUG)Q	identical					yjm1419_Chr05 - extra	94%id
tI(GAU)Q	not
tK(UUU)Q	identical					tN(GUU)Q
tL(UAA)Q	identical					yjm1399_mito	66 A > G
tM(CAU)Q1	not
tM(CAU)Q2	identical					tQ(UUG)Q
tN(GUU)Q	not					yjm1399_mito	76 T > A
tP(UGG)Q	identical
tQ(UUG)Q	not					tR(ACG)Q2
tR(ACG)Q2	not					yjm450_mito	74 A > T
tR(UCU)Q1	identical					yjm1415_mito	74 A > T
tS(GCU)Q1	identical					yjm1383_mito	74 A > T
tS(UGA)Q2	not
tT(UGU)Q1	identical					tV(UAC)Q
tT(XXX)Q2	identical					yjm1399_mito	60 C > T
tV(UAC)Q	not
tW(UCA)Q	identical					tY(GUA)Q
tY(GUA)Q	not					yjm270_mito	2 G > A
						yjm1419_mito	61 A > G
						tS(UGA)Q2
						yjm996_mito	49 T > C
						yjm993_mito	49 T > C
						yjm990_mito	49 T > C
						yjm987_mito	49 T > C
						yjm984_mito	49 T > C
						yjm981_mito	49 T > C
						yjm978_mito	49 T > C
						yjm975_mito	49 T > C
						yjm972_mito	49 T > C
						yjm969_mito	49 T > C
						yjm627_mito	6 G > A
						yjm428_mito	49 T > C
						yjm1439_mito	6 G > A
						yjm1415_mito	49 T > C
						yjm1248_mito	6 G > A
						SK1	6 G > A

## Sheet: cox3
Strain	57	69	109	211	213	273	300	309	318	378	405	474	480	501	540	588	717	768	787	789	791	792	795	798	804	807
yjm1078	0	T->A	0	0	0	0	0	0	0	C->T	0	0	0	0	T->C	0	0	0	0	0	0	0	0	0	0	0
yjm1083	0	T->A	0	0	0	0	0	0	0	0	0	0	0	0	0	0	0	0	G->C(N)	C->A(N)	0	C->T	C->T	0	A->T	C->T
yjm1129	0	T->A	0	0	0	0	0	0	0	C->T	0	0	C->T	0	T->C	0	T->C	0	G->C(N)	C->A(N)	0	C->T	C->T	0	A->T	C->T
yjm1133	0	T->A	0	0	0	0	0	0	0	C->T	0	0	0	0	T->C	0	0	0	0	0	0	0	0	A->G	0	0
yjm1190	0	T->A	0	0	0	0	0	0	0	0	0	0	0	0	T->C	0	T->C	0	0	0	0	0	0	0	0	0
yjm1199	0	T->A	0	0	0	0	0	0	0	0	0	0	0	0	T->C	0	T->C	0	G->C(N)	C->A(N)	0	C->T	C->T	0	A->T	C->T
yjm1202	0	T->A	0	0	0	0	0	0	0	0	0	0	0	0	T->C	0	T->C	0	G->C(N)	C->A(N)	0	C->T	C->T	0	A->T	C->T
yjm1208	0	T->A	0	0	0	0	0	0	0	C->T	0	0	0	0	T->C	0	0	0	0	0	0	0	C->T	0	0	0
yjm1242	0	T->A	0	0	0	0	0	0	0	C->T	0	0	0	0	T->C	0	0	0	0	0	0	0	0	0	0	0
yjm1244	0	T->A	0	0	0	0	0	0	0	C->T	0	0	0	0	T->C	0	0	0	G->C(N)	C->A(N)	0	C->T	C->T	0	A->T	C->T
yjm1248	0	T->A	0	0	0	0	0	0	0	0	0	0	0	C->T	0	0	T->C	C->T	0	C->A	0	0	0	0	A->T	C->T
yjm1250	0	T->A	0	0	0	0	0	0	0	C->T	0	0	0	0	T->C	0	0	0	G->C(N)	C->A(N)	0	C->T	C->T	0	A->T	C->T
yjm1252	0	T->A	0	0	0	0	0	0	0	C->T	0	0	0	0	T->C	0	0	0	0	0	0	0	0	0	A->G	0
yjm1273	0	T->A	0	0	0	0	0	0	0	C->T	0	0	0	0	0	0	0	0	0	0	0	0	0	0	A->T	0
yjm1304	0	T->A	0	0	0	0	0	0	0	C->T	0	0	0	0	0	0	0	0	0	0	0	0	0	0	A->T	0
yjm1307	0	0	0	0	0	0	0	0	0	0	0	0	0	0	0	0	0	0	0	0	0	0	0	0	0	0
yjm1311	0	0	0	0	0	0	0	0	0	0	0	0	0	C->T	0	0	0	0	0	0	0	0	C->T	0	0	0
yjm1326	0	0	0	0	0	0	0	0	0	0	0	0	0	0	0	0	0	0	G->C(N)	C->A(N)	0	C->T	C->T	0	A->T	C->T
yjm1332	0	T->A	0	0	0	0	0	0	0	C->T	0	0	0	0	T->C	0	T->C	0	G->C(N)	C->A(N)	0	C->T	C->T	0	A->T	C->T
yjm1336	0	T->A	0	0	0	0	0	0	0	C->T	0	0	0	0	T->C	0	0	0	0	0	0	0	0	0	0	0
yjm1338	0	T->A	0	0	0	0	0	0	0	C->T	0	0	0	0	T->C	0	0	C->T	G->C(N)	C->A(N)	0	C->T	C->T	0	A->T	C->T
yjm1341	0	T->A	0	0	0	0	0	0	0	C->T	0	0	0	0	T->C	0	0	C->T	G->C(N)	C->A(N)	0	C->T	C->T	0	A->T	C->T
yjm1342	0	T->A	0	0	0	0	0	0	0	C->T	0	0	0	0	T->C	0	T->C	0	G->C(N)	C->A(N)	0	C->T	C->T	0	A->T	C->T
yjm1355	0	T->A	0	0	0	0	0	0	0	0	0	0	0	0	0	0	0	0	G->C(N)	C->A(N)	0	C->T	C->T	0	A->T	C->T
yjm1356	0	T->A	0	0	0	0	0	0	0	C->T	0	0	C->T	0	T->C	0	0	0	G->C(N)	C->A(N)	0	C->T	C->T	0	A->T	C->T
yjm1381	0	T->A	0	0	0	0	0	0	0	0	0	0	0	0	0	0	T->C	0	G->C(N)	C->A(N)	0	C->T	C->T	0	A->T	C->T
yjm1383	0	T->A	0	0	0	C->T	0	0	0	C->T	0	0	0	0	T->C	0	T->C	0	G->C(N)	C->A(N)	0	C->T	C->T	0	A->T	C->T
yjm1385	0	T->A	0	0	0	0	0	0	0	0	0	0	0	0	T->C	0	T->C	0	G->C(N)	C->A(N)	0	C->T	C->T	0	A->T	C->T
yjm1386	0	T->A	C->T(N)	0	0	C->T	0	0	C->T	C->T	C->T	0	0	0	T->C	0	T->C	0	G->C(N)	C->A(N)	0	C->T	C->T	0	A->T	C->T
yjm1387	0	T->A	0	0	0	0	0	0	0	C->T	0	0	0	C->T	0	0	0	0	0	0	0	0	C->T	0	0	0
yjm1388	0	0	0	0	0	0	0	0	0	0	0	0	0	0	T->C	0	0	0	0	0	0	0	C->T	0	0	0
yjm1389	0	T->A	0	0	0	0	0	0	0	0	0	0	0	0	0	0	0	0	0	0	0	0	C->T	0	0	0
yjm1399	T->A	T->A	0	G->T(N)	T->A(N)	0	0	0	0	C->T	0	C->T	C->T	0	T->C	0	T->C	0	0	C->A	0	0	C->T	0	0	0
yjm1400	0	T->A	0	0	0	0	0	0	0	C->T	0	0	0	C->T	0	0	0	0	G->C(N)	C->A(N)	0	C->T	C->T	0	A->T	C->T
yjm1401	0	T->A	0	0	0	0	0	0	0	0	0	0	0	C->T	0	0	0	0	0	0	0	0	C->T	0	0	0
yjm1402	0	T->A	0	0	0	0	0	0	0	C->T	0	0	0	0	0	0	0	0	0	0	0	0	0	0	0	0
yjm1415	0	T->A	0	0	0	0	0	0	0	C->T	0	0	C->T	0	T->C	0	T->C	0	G->C(N)	C->A(N)	0	C->T	C->T	0	A->T	C->T
yjm1417	0	T->A	0	0	0	0	0	0	0	C->T	0	0	0	0	T->C	0	T->C	0	G->C(N)	C->A(N)	0	C->T	C->T	0	A->T	C->T
yjm1418	0	T->A	0	0	0	0	0	0	0	C->T	0	0	0	0	T->C	0	T->C	0	0	0	0	0	0	0	0	0
yjm1419	0	T->A	0	0	0	0	0	0	0	C->T	0	0	0	0	T->C	0	0	0	0	0	0	0	C->T	0	0	0
yjm1433	0	T->A	0	0	0	0	0	0	0	C->T	0	0	0	0	T->C	0	T->C	0	G->C(N)	C->A(N)	0	C->T	C->T	0	A->T	C->T
yjm1434	0	T->A	0	0	0	0	0	0	0	C->T	0	0	0	0	0	0	0	0	0	0	0	0	0	0	A->T	0
yjm1439	0	T->A	0	0	0	0	0	0	0	0	0	0	0	C->T	0	0	T->C	C->T	0	C->A	0	0	0	0	A->T	C->T
yjm1443	0	T->A	0	0	0	0	0	0	0	0	0	0	0	0	T->C	0	T->C	0	0	0	0	0	0	0	0	0
yjm1444	0	T->A	0	0	0	0	0	0	0	0	0	0	0	0	T->C	C->T	0	0	0	C->A	0	0	0	0	0	0
yjm1447	0	T->A	0	0	0	0	0	T->A	0	C->T	0	0	0	0	T->C	0	T->C	0	0	C->A	0	0	0	0	A->T	0
yjm1450	0	T->A	0	0	0	0	0	0	0	C->T	0	0	0	0	0	0	T->C	0	0	0	0	0	0	0	0	0
yjm1460	0	T->A	0	0	0	0	0	0	0	0	0	0	0	C->T	0	0	0	0	G->C(N)	C->A(N)	0	C->T	C->T	0	A->T	C->T
yjm1463	0	T->A	0	0	0	0	0	0	0	C->T	0	0	C->T	0	T->C	0	0	0	G->C(N)	C->A(N)	0	C->T	C->T	0	A->T	C->T
yjm1477	0	T->A	0	0	0	0	0	0	0	C->T	0	0	0	0	T->C	0	0	0	0	0	0	0	0	0	0	0
yjm1478	0	T->A	0	0	0	0	0	0	0	C->T	0	0	0	0	0	0	0	0	G->C(N)	C->A(N)	0	C->T	C->T	0	A->T	C->T
yjm1479	0	T->A	0	0	0	0	0	0	0	C->T	0	0	0	C->T	0	0	0	0	G->C(N)	C->A(N)	0	C->T	C->T	0	A->T	C->T
yjm1526	0	T->A	0	0	0	0	0	0	0	C->T	0	0	C->T	0	T->C	0	T->C	0	G->C(N)	C->A(N)	0	C->T	C->T	0	A->T	C->T
yjm1527	0	T->A	0	0	0	0	0	0	0	0	0	0	0	0	T->C	C->T	0	0	0	C->A	0	0	0	0	0	0
yjm1549	0	0	0	0	0	0	0	0	0	0	0	0	0	0	0	0	0	0	G->C(N)	C->A(N)	0	C->T	C->T	0	A->T	C->T
yjm1573	0	T->A	0	0	0	0	0	0	0	C->T	0	0	0	0	0	0	0	0	0	0	0	0	0	0	0	0
yjm1574	0	T->A	0	0	0	0	A->T(N)	0	0	C->T	0	0	0	0	T->C	0	T->C	C->T	G->C(N)	C->A(N)	T->A(N)	C->T(N)	C->T	0	A->T	C->T
yjm1592	0	T->A	0	0	0	0	0	0	0	0	0	0	0	0	0	0	0	0	0	0	0	0	C->T	0	0	0
yjm1615	0	T->A	0	0	0	0	0	0	0	C->T	0	0	0	0	T->C	0	0	0	0	0	0	0	C->T	0	0	0
yjm189	0	T->A	0	0	0	0	0	0	0	C->T	0	0	0	0	T->C	0	T->C	0	G->C(N)	C->A(N)	0	C->T	C->T	0	A->T	C->T
yjm193	0	T->A	0	0	0	0	0	0	0	C->T	0	0	0	0	T->C	0	0	0	G->C(N)	C->A(N)	0	C->T	C->T	0	A->T	C->T
yjm195	0	T->A	0	0	0	0	0	0	0	0	0	0	0	C->T	0	0	0	0	0	C->A	0	C->T	0	0	0	0
yjm244	0	T->A	0	0	0	0	0	0	0	C->T	0	0	C->T	0	T->C	0	T->C	0	G->C(N)	C->A(N)	0	C->T	C->T	0	A->T	C->T
yjm248	0	T->A	0	0	0	0	0	0	0	C->T	0	0	0	0	T->C	0	0	C->T	G->C(N)	C->A(N)	0	C->T	C->T	0	A->T	C->T
yjm270	0	T->A	0	0	0	0	A->T(N)	0	0	C->T	0	0	0	0	T->C	0	T->C	C->T	G->C(N)	C->A(N)	T->A(N)	C->T(N)	C->T	0	A->T	C->T
yjm271	0	T->A	0	0	0	0	0	0	0	C->T	0	0	0	0	T->C	0	0	0	G->C(N)	C->A(N)	0	C->T	C->T	0	A->T	C->T
yjm320	0	T->A	0	0	0	0	0	0	0	C->T	0	0	0	0	0	0	0	0	0	0	0	0	0	0	A->T	0
yjm326	0	T->A	0	0	0	0	0	0	0	C->T	0	0	0	0	T->C	0	0	0	0	0	0	0	0	0	A->T	0
yjm428	0	T->A	0	0	0	0	0	0	0	C->T	0	0	0	0	T->C	0	T->C	0	G->C(N)	C->A(N)	0	C->T	C->T	0	A->T	C->T
yjm450	0	T->A	0	0	0	0	0	0	0	0	0	0	0	0	T->C	C->T	0	0	G->C(N)	C->A(N)	0	C->T	C->T	0	A->T	C->T
yjm451	0	T->A	0	0	0	0	0	0	0	0	0	0	0	0	T->C	C->T	0	0	0	C->A	0	0	0	0	0	0
yjm453	0	T->A	0	0	0	0	0	0	0	C->T	0	0	0	0	T->C	0	0	0	0	0	0	0	0	0	0	0
yjm456	0	T->A	0	0	0	0	0	0	0	C->T	0	0	0	0	0	0	0	0	0	0	0	0	0	0	A->T	0
yjm470	0	T->A	0	0	0	0	0	0	0	C->T	0	0	0	C->T	0	0	0	0	0	0	0	0	0	0	0	0
yjm541	0	T->A	0	0	0	0	0	0	0	C->T	0	0	0	0	0	0	0	0	0	0	0	0	0	0	A->T	0
yjm554	0	T->A	0	0	0	0	0	0	0	C->T	0	0	0	0	0	0	0	0	0	0	0	0	0	0	A->T	0
yjm555	0	T->A	0	0	0	0	0	0	0	C->T	0	0	0	0	0	0	0	0	0	0	0	0	0	0	A->T	0
yjm627	0	T->A	0	0	0	0	0	0	0	C->T	0	0	0	0	T->C	0	0	0	0	0	0	0	0	0	0	0
yjm681	0	T->A	0	0	0	0	0	0	0	0	0	0	0	C->T	0	0	0	0	0	0	0	0	C->T	0	0	0
yjm682	0	T->A	0	0	0	0	0	0	0	C->T	0	0	0	0	T->C	0	0	0	0	0	0	0	0	0	A->T	0
yjm683	0	T->A	0	0	0	0	0	0	0	C->T	0	0	0	0	T->C	0	0	0	0	0	0	0	0	0	A->T	0
yjm689	0	T->A	0	0	0	0	0	0	0	0	0	0	0	0	0	0	0	0	G->C(N)	C->A(N)	0	C->T	C->T	0	A->T	C->T
yjm693	0	T->A	0	0	0	C->T	0	0	0	C->T	0	0	0	0	T->C	0	T->C	0	G->C(N)	C->A(N)	0	C->T	C->T	0	A->T	C->T
yjm969	0	T->A	0	0	0	0	0	0	0	C->T	0	0	0	0	T->C	0	0	0	G->C(N)	C->A(N)	0	C->T	C->T	0	A->T	C->T
yjm972	0	T->A	0	0	0	0	0	0	0	C->T	0	0	0	0	T->C	0	0	0	G->C(N)	C->A(N)	0	C->T	C->T	0	A->T	C->T
yjm975	0	T->A	0	0	0	0	0	0	0	C->T	0	0	0	0	T->C	0	0	0	G->C(N)	C->A(N)	0	C->T	C->T	0	A->T	C->T
yjm978	0	T->A	0	0	0	0	0	0	0	C->T	0	0	0	0	T->C	0	0	0	G->C(N)	C->A(N)	0	C->T	C->T	0	A->T	C->T
yjm981	0	T->A	0	0	0	0	0	0	0	C->T	0	0	0	0	T->C	0	0	0	G->C(N)	C->A(N)	0	C->T	C->T	0	A->T	C->T
yjm984	0	T->A	0	0	0	0	0	0	0	C->T	0	0	0	0	T->C	0	0	0	G->C(N)	C->A(N)	0	C->T	C->T	0	A->T	C->T
yjm987	0	T->A	0	0	0	0	0	0	0	C->T	0	0	0	0	T->C	0	0	0	G->C(N)	C->A(N)	0	C->T	C->T	0	A->T	C->T
yjm990	0	T->A	0	0	0	0	0	0	0	C->T	0	0	0	0	T->C	0	0	0	G->C(N)	C->A(N)	0	C->T	C->T	0	A->T	C->T
yjm993	0	T->A	0	0	0	0	0	0	0	C->T	0	0	0	0	T->C	0	0	0	G->C(N)	C->A(N)	0	C->T	C->T	0	A->T	C->T
yjm996	0	T->A	0	0	0	0	0	0	0	C->T	0	0	0	0	T->C	0	0	0	G->C(N)	C->A(N)	0	C->T	C->T	0	A->T	C->T
SK1	0	T->A	0	0	0	0	0	0	0	0	0	0	0	0	0	0	T->C	C->T	0	0	0	0	0	0	0	0
YJM789	0	T->A	0	0	0	0	0	0	0	C->T	0	0	0	0	0	0	0	0	0	0	0	0	0	0	A->T	0

## Sheet: cox2
Strain	29	294	468	531	570	624	627	633	648	657	658	659	663	664	665	666	669	672	675	678	679	680	681	684	690	693	699	705	708	711	714
yjm1078	0	0	0	0	0	0	0	0	0	A->G	0	0	0	0	0	0	0	0	0	0	0	0	0	0	0	0	0	G->A	0	0	0
yjm1083	0	T->C	T->A	0	T->C	0	T->A	0	0	A->G	0	0	0	0	0	0	0	0	0	0	0	0	0	0	0	0	0	G->A	0	0	0
yjm1129	0	0	0	0	0	0	0	0	C->T	A->G	0	0	0	0	0	0	0	0	0	0	0	0	0	0	0	0	0	G->A	0	0	0
yjm1133	0	0	0	0	0	0	0	0	0	A->G	0	0	0	0	0	0	0	0	0	0	0	0	0	0	0	0	0	0	0	0	0
yjm1190	0	T->C	T->A	0	T->C	T->C	T->A	T->C	0	0	G->C(N)	C->A(N)	T->C	0	0	T->A	G->A	0	T->C	G->A	A->C	C->T	0	T->A	A->C	T->C	0	G->A	C->T	0	0
yjm1199	0	T->C	T->A	0	T->C	T->C	T->A	T->C	0	0	G->C(N)	C->A(N)	T->C	0	0	T->A	G->A	0	T->C	G->A	A->C	C->T	0	T->A	A->C	T->C	0	G->A	C->T	0	0
yjm1202	0	T->C	T->A	0	T->C	T->C	T->A	T->C	0	0	G->C(N)	C->A(N)	T->C	0	0	T->A	G->A	0	T->C	G->A	A->C	C->T	0	T->A	A->C	T->C	0	G->A	C->T	0	0
yjm1208	0	T->C	T->A	0	T->C	T->C	T->A	0	C->T	0	G->C(N)	C->A(N)	0	T->A	C->G	0	G->A	0	T->C	G->A	A->C	C->T	A->G	T->A	A->C	T->C	A->G	G->A	C->T	A->G	0
yjm1242	0	0	0	0	0	0	0	0	0	A->G	0	0	0	0	0	0	0	0	0	0	0	0	0	0	0	0	0	0	0	0	0
yjm1244	0	0	0	0	0	0	0	0	C->T	A->G	0	0	0	0	0	0	0	0	0	0	0	0	0	0	0	0	0	G->A	0	0	0
yjm1248	0	0	T->A	0	T->C	0	T->A	0	0	A->G	0	0	0	0	0	0	0	0	0	0	0	0	0	0	0	0	0	0	0	0	0
yjm1250	0	0	0	0	0	0	0	0	0	0	G->C(N)	C->A(N)	0	0	0	T->A	G->A	G->A	0	G->A	A->C	C->T	0	T->A	A->T	T->C	0	G->A	C->T	0	0
yjm1252	0	0	0	0	0	0	0	0	0	A->G	0	0	0	0	0	0	0	0	0	0	0	0	0	0	0	0	0	0	0	0	0
yjm1273	0	T->C	T->A	0	T->C	0	T->A	0	C->T	0	G->C(N)	C->A(N)	T->C	0	0	T->A	0	0	T->C	G->A	A->C	C->T	A->G	T->A	A->C	T->C	0	G->A	C->T	0	0
yjm1304	0	T->C	T->A	0	T->C	T->C	T->A	T->C	0	0	G->C(N)	C->A(N)	T->C	0	0	T->A	G->A	0	T->C	G->A	A->C	C->T	A->G	T->A	A->C	T->C	A->T	G->A	C->T	0	0
yjm1307	0	0	0	0	0	0	0	0	0	0	0	0	0	0	0	0	0	0	0	0	0	0	0	0	0	0	0	0	0	0	0
yjm1311	0	T->C	T->A	0	T->C	0	0	0	0	A->G	0	0	0	0	0	0	0	0	0	0	0	0	0	0	0	0	0	0	0	0	0
yjm1326	0	T->C	T->A	0	T->C	T->C	T->A	T->C	0	0	G->C(N)	C->A(N)	T->C	0	0	T->A	G->A	0	T->C	G->A	A->C	C->T	A->G	T->A	A->C	T->C	A->T	G->A	C->T	0	0
yjm1332	0	0	0	0	0	0	0	0	0	A->G	0	0	0	0	0	0	0	0	0	0	0	0	0	0	0	0	0	0	0	0	0
yjm1336	0	0	0	0	0	0	0	0	C->T	A->G	0	0	0	0	0	0	0	0	0	0	0	0	0	0	0	0	0	G->A	0	0	0
yjm1338	0	0	0	0	0	0	0	0	0	0	G->C(N)	C->A(N)	0	0	0	T->A	G->A	G->A	0	G->A	A->C	C->T	0	T->A	A->T	T->C	0	G->A	C->T	0	0
yjm1341	0	0	0	0	0	0	0	0	0	0	G->C(N)	C->A(N)	0	0	0	T->A	G->A	G->A	0	G->A	A->C	C->T	0	T->A	A->T	T->C	0	G->A	C->T	0	0
yjm1342	0	T->C	T->A	0	T->C	T->C	T->A	T->C	0	0	G->C(N)	C->A(N)	T->C	0	0	T->A	G->A	0	T->C	G->A	A->C	C->T	A->G	T->A	A->C	T->C	0	G->A	C->T	0	0
yjm1355	0	T->C	T->A	0	T->C	0	T->A	0	0	A->G	0	0	0	0	0	0	0	0	0	0	0	0	0	0	0	0	0	G->A	0	0	0
yjm1356	0	0	0	0	0	0	0	0	0	A->G	0	0	0	0	0	0	0	0	0	0	0	0	0	0	0	0	0	0	0	0	0
yjm1381	0	0	T->A	0	T->C	0	T->A	0	0	A->G	0	0	0	0	0	0	0	0	0	0	0	0	0	0	0	0	0	G->A	0	0	0
yjm1383	0	0	T->A	0	T->C	T->C	T->A	T->C	C->T	0	G->C(N)	C->A(N)	T->C	0	0	T->A	G->A	0	T->C	G->A	A->C	C->T	A->G	T->A	A->C	T->C	0	G->A	C->T	0	0
yjm1385	0	T->C	T->A	0	0	0	0	0	0	A->G	0	0	0	0	0	0	0	0	0	0	0	0	0	0	0	0	0	0	0	0	0
yjm1386	0	0	T->A	0	T->C	T->C	T->A	T->C	0	0	G->C(N)	C->A(N)	T->C	0	0	T->A	G->A	0	T->C	G->A	A->C	C->T	A->G	T->A	A->C	T->C	0	G->A	C->T	0	0
yjm1387	0	T->C	T->A	0	T->C	0	T->A	0	C->T	0	G->C(N)	C->A(N)	T->C	0	0	T->A	0	0	T->C	G->A	A->C	C->T	A->G	T->A	A->C	T->C	0	G->A	C->T	0	0
yjm1388	0	T->C	T->A	0	T->C	T->C	T->A	T->C	0	0	G->C(N)	C->A(N)	T->C	0	0	T->A	G->A	0	T->C	G->A	A->C	C->T	A->G	T->A	A->C	T->C	0	G->A	C->T	0	0
yjm1389	0	T->C	T->A	0	T->C	T->C	T->A	T->C	0	0	G->C(N)	C->A(N)	T->C	0	0	T->A	G->A	0	T->C	G->A	A->C	C->T	A->G	T->A	A->C	T->C	0	G->A	C->T	0	0
yjm1399	0	0	T->A	C->T	T->C	0	0	0	0	A->T	G->C(N)	C->A(N)	T->C	T->A	C->G	0	0	0	0	0	0	0	A->T	0	0	0	A->G	G->A	0	0	A->T
yjm1400	0	T->C	T->A	0	T->C	T->C	T->A	0	C->T	A->G	0	0	0	0	0	0	0	0	0	0	0	0	0	0	0	0	A->T	G->A	0	0	0
yjm1401	0	T->C	T->A	0	T->C	0	0	0	0	A->G	0	0	0	0	0	0	0	0	0	0	0	0	0	0	0	0	0	0	0	0	0
yjm1402	0	T->C	T->A	0	T->C	0	T->A	0	C->T	0	G->C(N)	C->A(N)	0	T->A	C->G	0	G->A	0	T->C	G->A	A->C	C->T	A->G	T->A	A->C	T->C	A->G	G->A	C->T	A->G	0
yjm1415	0	0	0	0	0	0	0	0	0	0	G->C(N)	C->A(N)	0	T->A	C->G	0	G->A	0	T->C	G->A	A->C	C->T	A->G	T->A	A->C	T->C	A->G	G->A	C->T	A->G	0
yjm1417	0	0	0	0	0	0	0	0	0	0	G->C(N)	C->A(N)	0	0	0	T->A	G->A	G->A	0	G->A	A->C	C->T	0	T->A	A->T	T->C	0	G->A	C->T	0	0
yjm1418	0	T->C	T->A	0	T->C	T->C	T->A	T->C	C->T	0	G->C(N)	C->A(N)	T->C	0	0	T->A	0	0	T->C	G->A	A->C	C->T	A->G	T->A	A->C	T->C	A->T	G->A	C->T	0	0
yjm1419	0	T->C	T->A	0	T->C	T->C	T->A	T->C	0	0	G->C(N)	C->A(N)	T->C	0	0	T->A	G->A	0	0	G->A	A->C	C->T	0	T->A	A->C	T->C	0	G->A	C->T	0	0
yjm1433	0	T->C	T->A	0	T->C	T->C	T->A	0	C->T	0	G->C(N)	C->A(N)	0	T->A	C->G	0	G->A	0	T->C	G->A	A->C	C->T	A->G	T->A	A->C	T->C	A->G	G->A	C->T	A->G	0
yjm1434	0	T->C	T->A	0	T->C	0	T->A	0	C->T	0	G->C(N)	C->A(N)	T->C	0	0	T->A	0	0	T->C	G->A	A->C	C->T	A->G	T->A	A->C	T->C	0	G->A	C->T	0	0
yjm1439	0	0	T->A	0	T->C	0	T->A	0	0	A->G	0	0	0	0	0	0	0	0	0	0	0	0	0	0	0	0	0	0	0	0	0
yjm1443	0	T->C	T->A	0	T->C	T->C	T->A	T->C	0	0	G->C(N)	C->A(N)	T->C	0	0	T->A	G->A	0	T->C	G->A	A->C	C->T	A->G	T->A	A->C	T->C	A->T	G->A	C->T	0	0
yjm1444	0	T->C	T->A	0	T->C	T->C	T->A	T->C	C->T	0	G->C(N)	C->A(N)	T->C	0	0	T->A	0	0	T->C	G->A	A->C	C->T	A->G	T->A	A->C	T->C	0	G->A	C->T	0	0
yjm1447	0	T->C	T->A	0	T->C	T->C	T->A	0	C->T	0	G->C(N)	C->A(N)	0	T->A	C->G	0	G->A	0	T->C	G->A	A->C	C->T	A->G	T->A	A->C	T->C	0	G->A	C->T	0	0
yjm1450	0	T->C	T->A	0	T->C	0	T->A	T->C	0	0	G->C(N)	C->A(N)	T->C	0	0	T->A	G->A	0	T->C	G->A	A->C	C->T	A->G	T->A	A->C	T->C	0	G->A	C->T	0	0
yjm1460	0	T->C	T->A	0	T->C	T->C	T->A	T->C	0	0	G->C(N)	C->A(N)	0	T->A	C->G	0	G->A	0	T->C	G->A	A->C	C->T	A->G	T->A	A->C	T->C	A->G	G->A	C->T	A->G	0
yjm1463	0	0	0	0	0	0	T->A	0	C->T	A->G	0	0	0	0	0	0	0	0	0	0	0	0	0	0	0	0	0	G->A	0	0	0
yjm1477	0	0	0	0	0	0	0	0	0	A->G	0	0	0	0	0	0	0	0	0	0	0	0	0	0	0	0	0	0	0	0	0
yjm1478	0	T->C	T->A	0	0	0	0	0	C->T	A->G	0	0	0	0	0	0	0	0	0	0	0	0	0	0	0	0	0	G->A	0	0	0
yjm1479	0	T->C	T->A	0	T->C	T->C	T->A	0	C->T	A->G	0	0	0	0	0	0	0	0	0	0	0	0	0	0	0	0	A->T	G->A	0	0	0
yjm1526	0	0	0	0	0	0	0	0	C->T	A->G	0	0	0	0	0	0	0	0	0	0	0	0	0	0	0	0	0	G->A	0	0	0
yjm1527	0	T->C	T->A	0	T->C	T->C	T->A	T->C	C->T	0	G->C(N)	C->A(N)	T->C	0	0	T->A	0	0	T->C	G->A	A->C	C->T	A->G	T->A	A->C	T->C	0	G->A	C->T	0	0
yjm1549	0	T->C	T->A	0	T->C	T->C	T->A	T->C	C->T	0	G->C(N)	C->A(N)	T->C	0	0	T->A	G->A	0	T->C	G->A	A->C	C->T	A->G	T->A	A->C	T->C	0	G->A	C->T	0	0
yjm1573	0	T->C	T->A	0	T->C	0	T->A	0	C->T	0	G->C(N)	C->A(N)	0	T->A	C->G	0	G->A	0	T->C	G->A	A->C	C->T	A->G	T->A	A->C	T->C	A->G	G->A	C->T	A->G	0
yjm1574	0	T->C	T->A	0	T->C	T->C	T->A	0	C->T	0	G->C(N)	C->A(N)	0	T->A	C->G	0	G->A	0	T->C	G->A	A->C	C->T	A->G	T->A	A->C	T->C	A->G	G->A	C->T	A->G	0
yjm1592	0	T->C	T->A	0	T->C	T->C	T->A	T->C	0	0	G->C(N)	C->A(N)	T->C	0	0	T->A	G->A	0	T->C	G->A	A->C	C->T	A->G	T->A	A->C	T->C	0	G->A	C->T	0	0
yjm1615	0	T->C	T->A	0	T->C	T->C	T->A	0	C->T	0	G->C(N)	C->A(N)	0	T->A	C->G	0	G->A	0	T->C	G->A	A->C	C->T	A->G	T->A	A->C	T->C	A->G	G->A	C->T	A->G	0
yjm189	0	0	0	0	0	0	0	0	0	0	G->C(N)	C->A(N)	0	0	0	T->A	G->A	G->A	0	G->A	A->C	C->T	0	T->A	A->T	T->C	0	G->A	C->T	0	0
yjm193	0	T->C	T->A	0	0	0	0	0	C->T	A->G	0	0	0	0	0	0	0	0	0	0	0	0	0	0	0	0	0	G->A	0	0	0
yjm195	C->G(N)	0	T->A	0	T->C	T->C	T->A	T->C	C->T	0	G->C(N)	C->A(N)	T->C	T->A	C->G	0	G->A	0	T->C	G->A	A->C	C->T	0	T->A	A->C	T->C	A->G	G->A	C->T	A->G	0
yjm244	0	0	0	0	0	0	0	0	0	0	G->C(N)	C->A(N)	0	0	0	T->A	G->A	G->A	0	G->A	A->C	C->T	0	T->A	A->T	T->C	0	G->A	C->T	0	0
yjm248	0	0	0	0	0	0	0	0	0	0	G->C(N)	C->A(N)	0	0	0	T->A	G->A	G->A	0	G->A	A->C	C->T	0	T->A	A->T	T->C	0	G->A	C->T	0	0
yjm270	0	0	0	0	0	0	T->A	0	C->T	0	G->C(N)	C->A(N)	0	T->A	C->G	0	G->A	0	T->C	G->A	A->C	C->T	A->G	T->A	A->C	T->C	A->G	G->A	C->T	A->G	0
yjm271	0	T->C	T->A	0	0	0	0	0	C->T	A->G	0	0	0	0	0	0	0	0	0	0	0	0	0	0	0	0	0	G->A	0	0	0
yjm320	0	0	0	0	0	0	0	0	0	A->G	0	0	0	0	0	0	0	0	0	0	0	0	0	0	0	0	0	0	0	0	0
yjm326	0	0	0	0	0	0	0	0	0	A->G	0	0	0	0	0	0	0	0	0	0	0	0	0	0	0	0	0	0	0	0	0
yjm428	0	0	0	0	0	0	0	0	0	A->G	0	0	0	0	0	0	0	0	0	0	0	0	0	0	0	0	0	0	0	0	0
yjm450	0	T->C	T->A	0	T->C	T->C	T->A	T->C	C->T	0	G->C(N)	C->A(N)	T->C	0	0	T->A	0	0	T->C	G->A	A->C	C->T	A->G	T->A	A->C	T->C	0	G->A	C->T	0	0
yjm451	0	T->C	T->A	0	T->C	T->C	T->A	T->C	C->T	0	G->C(N)	C->A(N)	T->C	0	0	T->A	0	0	T->C	G->A	A->C	C->T	A->G	T->A	A->C	T->C	0	G->A	C->T	0	0
yjm453	0	0	0	0	0	0	T->A	0	C->T	A->G	0	0	0	0	0	0	0	0	0	0	0	0	0	0	0	0	0	G->A	0	0	0
yjm456	0	T->C	T->A	0	T->C	T->C	T->A	T->C	0	0	G->C(N)	C->A(N)	T->C	0	0	T->A	G->A	0	T->C	G->A	A->C	C->T	A->G	T->A	A->C	T->C	A->T	G->A	C->T	0	0
yjm470	0	T->C	T->A	0	T->C	T->C	T->A	0	C->T	0	G->C(N)	C->A(N)	0	T->A	C->G	0	G->A	0	T->C	G->A	A->C	C->T	A->G	T->A	A->C	T->C	A->G	G->A	C->T	A->G	0
yjm541	0	0	0	0	0	0	0	0	0	A->G	0	0	0	0	0	0	0	0	0	0	0	0	0	0	0	0	0	0	0	0	0
yjm554	0	0	0	0	0	0	0	0	0	A->G	0	0	0	0	0	0	0	0	0	0	0	0	0	0	0	0	0	0	0	0	0
yjm555	0	T->C	T->A	0	T->C	T->C	T->A	T->C	0	0	G->C(N)	C->A(N)	T->C	0	0	T->A	G->A	0	T->C	G->A	A->C	C->T	A->G	T->A	A->C	T->C	A->T	G->A	C->T	0	0
yjm627	0	0	0	0	0	0	0	0	C->T	A->G	0	0	0	0	0	0	0	0	0	0	0	0	0	0	0	0	0	G->A	0	0	0
yjm681	0	T->C	T->A	0	T->C	0	T->A	T->C	0	0	G->C(N)	C->A(N)	T->C	0	0	T->A	G->A	0	T->C	G->A	A->C	C->T	A->G	T->A	A->C	T->C	0	G->A	C->T	0	0
yjm682	0	0	0	0	0	0	0	0	0	A->G	0	0	0	0	0	0	0	0	0	0	0	0	0	0	0	0	0	0	0	0	0
yjm683	0	0	0	0	0	0	0	0	0	A->G	0	0	0	0	0	0	0	0	0	0	0	0	0	0	0	0	0	0	0	0	0
yjm689	0	T->C	T->A	0	T->C	0	T->A	0	0	A->G	0	0	0	0	0	0	0	0	0	0	0	0	0	0	0	0	0	G->A	0	0	0
yjm693	0	T->C	T->A	0	T->C	T->C	T->A	0	C->T	A->G	0	0	0	0	0	0	0	0	0	0	0	0	0	0	0	0	A->T	G->A	0	0	0
yjm969	0	0	0	0	0	0	0	0	0	0	G->C(N)	C->A(N)	0	0	0	T->A	G->A	G->A	0	G->A	A->C	C->T	0	T->A	A->T	T->C	0	G->A	C->T	0	0
yjm972	0	0	0	0	0	0	0	0	0	0	G->C(N)	C->A(N)	0	0	0	T->A	G->A	G->A	0	G->A	A->C	C->T	0	T->A	A->T	T->C	0	G->A	C->T	0	0
yjm975	0	0	0	0	0	0	0	0	0	0	G->C(N)	C->A(N)	0	0	0	T->A	G->A	G->A	0	G->A	A->C	C->T	0	T->A	A->T	T->C	0	G->A	C->T	0	0
yjm978	0	0	0	0	0	0	0	0	0	0	G->C(N)	C->A(N)	0	0	0	T->A	G->A	G->A	0	G->A	A->C	C->T	0	T->A	A->T	T->C	0	G->A	C->T	0	0
yjm981	0	0	0	0	0	0	0	0	0	0	G->C(N)	C->A(N)	0	0	0	T->A	G->A	G->A	0	G->A	A->C	C->T	0	T->A	A->T	T->C	0	G->A	C->T	0	0
yjm984	0	0	0	0	0	0	0	0	0	0	G->C(N)	C->A(N)	0	0	0	T->A	G->A	G->A	0	G->A	A->C	C->T	0	T->A	A->T	T->C	0	G->A	C->T	0	0
yjm987	0	0	0	0	0	0	0	0	0	0	G->C(N)	C->A(N)	0	0	0	T->A	G->A	G->A	0	G->A	A->C	C->T	0	T->A	A->T	T->C	0	G->A	C->T	0	0
yjm990	0	0	0	0	0	0	0	0	0	0	G->C(N)	C->A(N)	0	0	0	T->A	G->A	G->A	0	G->A	A->C	C->T	0	T->A	A->T	T->C	0	G->A	C->T	0	0
yjm993	0	0	0	0	0	0	0	0	0	0	G->C(N)	C->A(N)	0	0	0	T->A	G->A	G->A	0	G->A	A->C	C->T	0	T->A	A->T	T->C	0	G->A	C->T	0	0
yjm996	0	0	0	0	0	0	0	0	0	0	G->C(N)	C->A(N)	0	0	0	T->A	G->A	G->A	0	G->A	A->C	C->T	0	T->A	A->T	T->C	0	G->A	C->T	0	0
SK1	0	0	T->A	0	0	0	T->A	0	0	0	0	0	0	0	0	0	0	0	0	0	0	0	0	0	0	0	0	0	0	0	0
YJM789	0	T->C	T->A	0	T->C	T->C	T->A	T->C	0	0	G->C(N)	C->A(N)	T->C	0	0	T->A	G->A	0	T->C	G->A	A->C	C->T	A->G	T->A	A->C	T->C	A->T	G->A	C->T	0	0

## Sheet: RF1
Strain (compared to RF1 coding sequence in SGD )	orf length	1	24	27	28	30	33	42	43	51	53	54	55	56	57	58	62	63	94	95	104	106	112	114	115	137	141	144	154	166	168	187	192	211	212	213	216	217	219	220	222	223	224	226	227	228	229	230	231
yjm1250_mito_RF1	21	0	0	T->A	T->A	C->T	A->G	0	T->C	T->A	0	0	0	A->T	A->T	0	0	13 Ins	0	0	0	G->A	G->A	T->A	T->A	0	0	A->T	A->G	G->A	T->A	0	A->T	0	0	3 Del	T->A	0	0	0	0	0	0	0	0	0	A->G	0	15 Ins
yjm1338_mito_RF1	21	0	0	T->A	T->A	C->T	A->G	0	T->C	T->A	0	0	0	A->T	A->T	0	0	13 Ins	0	0	0	G->A	G->A	T->A	T->A	0	0	A->T	A->G	G->A	T->A	0	A->T	G->A	0	0	4 Del	0	0	0	0	0	0	0	0	0	A->G	0	15 Ins
yjm1341_mito_RF1	21	0	0	T->A	T->A	C->T	A->G	0	T->C	T->A	0	0	0	A->T	A->T	0	0	13 Ins	0	0	0	G->A	G->A	T->A	T->A	0	0	A->T	A->G	G->A	T->A	0	A->T	0	0	3 Del	T->A	0	0	0	0	0	0	0	0	0	A->G	0	15 Ins
yjm1417_mito_RF1	21	0	0	T->A	T->A	C->T	A->G	0	T->C	T->A	0	0	0	A->T	A->T	0	0	13 Ins	0	0	0	G->A	G->A	T->A	T->A	0	0	A->T	A->G	G->A	T->A	0	A->T	0	0	3 Del	T->A	0	0	0	0	0	0	0	0	0	A->G	0	15 Ins
yjm189_mito_RF1	21	0	0	T->A	T->A	C->T	A->G	0	T->C	T->A	0	0	0	A->T	A->T	0	0	13 Ins	0	0	0	G->A	G->A	T->A	T->A	0	0	A->T	A->G	G->A	T->A	0	A->T	G->A	0	0	4 Del	0	0	0	0	0	0	0	0	0	A->G	0	15 Ins
yjm244_mito_RF1	21	0	0	T->A	T->A	C->T	A->G	0	T->C	T->A	0	0	0	A->T	A->T	0	0	13 Ins	0	0	0	G->A	G->A	T->A	T->A	0	0	A->T	A->G	G->A	T->A	0	A->T	0	0	3 Del	T->A	0	0	0	0	0	0	0	0	0	A->G	0	15 Ins
yjm248_mito_RF1	21	0	0	T->A	T->A	C->T	A->G	0	T->C	T->A	0	0	0	A->T	A->T	0	0	13 Ins	0	0	0	G->A	G->A	T->A	T->A	0	0	A->T	A->G	G->A	T->A	0	A->T	0	0	3 Del	T->A	0	0	0	0	0	0	0	0	0	A->G	0	15 Ins
yjm969_mito_RF1	21	0	0	T->A	T->A	C->T	A->G	0	T->C	T->A	0	0	0	A->T	A->T	0	0	13 Ins	0	0	0	G->A	G->A	T->A	T->A	0	0	A->T	A->G	G->A	T->A	0	A->T	0	0	3 Del	T->A	0	0	0	0	0	0	0	0	0	A->G	0	15 Ins
yjm972_mito_RF1	21	0	0	T->A	T->A	C->T	A->G	0	T->C	T->A	0	0	0	A->T	A->T	0	0	13 Ins	0	0	0	G->A	G->A	T->A	T->A	0	0	A->T	A->G	G->A	T->A	0	A->T	0	0	3 Del	T->A	0	0	0	0	0	0	0	0	0	A->G	0	15 Ins
yjm975_mito_RF1	21	0	0	T->A	T->A	C->T	A->G	0	T->C	T->A	0	0	0	A->T	A->T	0	0	13 Ins	0	0	0	G->A	G->A	T->A	T->A	0	0	A->T	A->G	G->A	T->A	0	A->T	0	0	3 Del	T->A	0	0	0	0	0	0	0	0	0	A->G	0	15 Ins
yjm978_mito_RF1	21	0	0	T->A	T->A	C->T	A->G	0	T->C	T->A	0	0	0	A->T	A->T	0	0	13 Ins	0	0	0	G->A	G->A	T->A	T->A	0	0	A->T	A->G	G->A	T->A	0	A->T	0	0	3 Del	T->A	0	0	0	0	0	0	0	0	0	A->G	0	15 Ins
yjm981_mito_RF1	21	0	0	T->A	T->A	C->T	A->G	0	T->C	T->A	0	0	0	A->T	A->T	0	0	13 Ins	0	0	0	G->A	G->A	T->A	T->A	0	0	A->T	A->G	G->A	T->A	0	A->T	0	0	3 Del	T->A	0	0	0	0	0	0	0	0	0	A->G	0	15 Ins
yjm984_mito_RF1	21	0	0	T->A	T->A	C->T	A->G	0	T->C	T->A	0	0	0	A->T	A->T	0	0	13 Ins	0	0	0	G->A	G->A	T->A	T->A	0	0	A->T	A->G	G->A	T->A	0	A->T	0	0	3 Del	T->A	0	0	0	0	0	0	0	0	0	A->G	0	15 Ins
yjm987_mito_RF1	21	0	0	T->A	T->A	C->T	A->G	0	T->C	T->A	0	0	0	A->T	A->T	0	0	13 Ins	0	0	0	G->A	G->A	T->A	T->A	0	0	A->T	A->G	G->A	T->A	0	A->T	0	0	3 Del	T->A	0	0	0	0	0	0	0	0	0	A->G	0	15 Ins
yjm990_mito_RF1	21	0	0	T->A	T->A	C->T	A->G	0	T->C	T->A	0	0	0	A->T	A->T	0	0	13 Ins	0	0	0	G->A	G->A	T->A	T->A	0	0	A->T	A->G	G->A	T->A	0	A->T	0	0	3 Del	T->A	0	0	0	0	0	0	0	0	0	A->G	0	15 Ins
yjm993_mito_RF1	21	0	0	T->A	T->A	C->T	A->G	0	T->C	T->A	0	0	0	A->T	A->T	0	0	13 Ins	0	0	0	G->A	G->A	T->A	T->A	0	0	A->T	A->G	G->A	T->A	0	A->T	0	0	3 Del	T->A	0	0	0	0	0	0	0	0	0	A->G	0	15 Ins
yjm996_mito_RF1	21	0	0	T->A	T->A	C->T	A->G	0	T->C	T->A	0	0	0	A->T	A->T	0	0	13 Ins	0	0	0	G->A	G->A	T->A	T->A	0	0	A->T	A->G	G->A	T->A	0	A->T	0	0	3 Del	T->A	0	0	0	0	0	0	0	0	0	A->G	0	15 Ins
yjm1332_mito_RF1	33	0	0	0	0	0	0	0	0	0	T->A	0	0	40 Ins	0	0	0	0	0	0	0	0	0	0	0	0	0	0	0	0	0	0	0	0	0	0	0	0	0	0	0	0	0	0	0	0	0	0	0
yjm453_mito_RF1	33	0	0	0	0	0	0	0	0	0	T->A	0	0	40 Ins	0	0	0	0	0	0	0	0	0	0	0	0	0	0	0	0	0	0	0	0	0	0	0	0	0	0	0	0	0	0	0	0	0	0	0
yjm627_mito_RF1	33	0	0	0	0	0	0	0	0	0	T->A	0	0	40 Ins	0	0	0	0	0	0	0	0	0	0	0	0	0	0	0	0	0	0	0	0	0	0	0	0	0	0	0	0	0	0	0	0	0	0	0
yjm1342_mito_RF1	77	0	0	T->A	T->A	C->T	A->G	0	T->C	T->A	0	0	18 Ins	0	0	0	0	0	0	0	0	G->A	G->A	T->A	T->A	0	0	A->T	A->G	G->A	T->A	0	A->T	G->A	4 Ins	0	0	A->G	0	A->G	0	0	0	A->T	A->T	T->A	0	0	3 Ins
yjm1244_mito_RF1	115	0	0	0	0	0	0	0	0	0	0	0	0	0	0	0	0	0	0	0	0	0	0	0	0	0	0	0	0	0	0	0	0	0	0	0	0	0	0	0	0	0	0	0	0	0	0	0	0
yjm1387_mito_RF1	148	0	0	T->A	T->A	C->T	A->G	A->G	0	T->A	0	0	0	A->T	A->T	0	0	15 Ins	0	0	A->G	G->A	G->A	T->A	T->A	0	0	A->T	A->G	G->A	T->A	0	A->T	G->A	0	0	0	0	A->T	A->G	T->A	A->G	0	0	0	0	A->T	A->T	G->A
yjm1460_mito_RF1	148	0	0	T->A	T->A	C->T	A->G	A->G	0	T->A	0	0	0	A->T	A->T	0	0	15 Ins	0	0	A->G	G->A	0	T->A	0	0	0	0	A->G	0	T->A	0	A->T	G->A	0	0	0	0	A->T	A->G	T->A	A->G	0	0	0	0	A->T	A->T	G->A
yjm195_mito_RF1	148	0	0	T->A	T->A	C->T	A->G	A->G	0	T->A	0	0	0	A->T	A->T	A->G	0	15 Ins	0	0	A->G	G->A	0	T->A	0	0	0	0	A->G	0	T->A	0	A->T	G->A	0	0	0	0	A->T	A->G	T->A	A->G	0	0	0	0	A->T	A->T	G->A
yjm1129_mito_RF1	194	0	0	0	0	0	0	0	0	0	0	0	0	0	0	0	0	0	0	0	0	0	0	0	0	0	0	0	0	0	0	0	0	0	0	0	0	0	0	0	0	0	0	0	0	0	0	0	0
yjm1356_mito_RF1	194	0	0	0	0	0	0	0	0	0	0	0	0	0	0	0	0	0	0	0	0	0	0	0	0	0	0	0	0	0	0	0	0	0	0	0	0	0	0	0	0	0	0	0	0	0	0	0	0
yjm1381_mito_RF1	194	0	0	0	0	0	0	0	0	0	0	0	0	0	0	0	0	0	0	0	0	0	0	0	0	0	0	0	0	0	0	0	0	0	0	0	0	0	0	0	0	0	0	0	0	0	0	0	0
yjm1401_mito_RF1	194	0	0	0	0	0	0	0	0	0	0	0	0	0	0	0	0	0	0	0	0	0	0	0	0	0	0	0	0	0	0	0	0	0	0	0	0	0	0	0	0	0	0	0	0	0	0	0	0
yjm1526_mito_RF1	194	0	0	0	0	0	0	0	0	0	0	0	0	0	0	0	0	0	0	0	0	0	0	0	0	0	0	0	0	0	0	0	0	0	0	0	0	0	0	0	0	0	0	0	0	0	0	0	0
yjm1447_mito_RF1	306	0	0	T->A	T->A	C->T	A->G	A->G	0	T->A	0	0	0	A->T	A->T	0	0	15 Ins	0	0	A->G	G->A	0	T->A	0	0	0	0	A->G	0	T->A	0	A->T	G->A	0	0	0	0	A->T	A->G	T->A	A->G	0	0	0	0	A->T	A->T	G->A
s288c_RF1.seq	389	0	0	0	0	0	0	0	0	0	0	0	0	0	0	0	0	0	0	0	0	0	0	0	0	0	0	0	0	0	0	0	0	0	0	0	0	0	0	0	0	0	0	0	0	0	0	0	0
yjm1078_mito_RF1	389	0	0	0	0	0	0	0	0	0	0	0	0	0	0	0	0	0	0	0	0	0	0	0	0	0	0	0	0	0	0	0	0	0	0	0	0	0	0	0	0	0	0	0	0	0	0	0	0
yjm1083_mito_RF1	389	0	0	0	0	0	0	0	0	0	0	0	0	0	0	0	0	0	0	0	0	0	0	0	0	0	0	0	0	0	0	0	0	0	0	0	0	0	0	0	T->A	0	0	0	0	0	0	0	0
yjm1133_mito_RF1	389	0	0	0	0	0	0	0	0	0	0	0	0	0	0	0	0	0	0	0	0	0	0	0	0	0	0	0	0	0	0	0	0	0	0	0	0	0	0	0	0	0	0	0	0	0	0	0	0
yjm1252_mito_RF1	389	0	0	0	0	0	0	0	0	0	0	0	0	0	0	0	0	0	0	0	0	0	0	0	0	0	0	0	0	0	0	0	0	0	0	0	0	0	0	0	0	0	0	0	0	0	0	0	0
yjm1307_mito_RF1	389	0	0	0	0	0	0	0	0	0	0	0	0	0	0	0	0	0	0	0	0	0	0	0	0	0	0	0	0	0	0	0	0	0	0	0	0	0	0	0	0	0	0	0	0	0	0	0	0
yjm1311_mito_RF1	389	0	0	0	0	0	0	0	0	0	0	0	0	0	0	0	0	0	0	0	0	0	0	0	0	0	0	0	0	0	0	0	0	0	0	0	0	0	0	0	0	0	0	0	0	0	0	0	0
yjm1336_mito_RF1	389	0	0	0	0	0	0	0	0	0	0	0	0	0	0	0	0	0	0	0	0	0	0	0	0	0	0	0	0	0	0	0	0	0	0	0	0	0	0	0	0	0	0	0	0	0	0	0	0
yjm1355_mito_RF1	389	0	0	0	0	0	0	0	0	0	0	0	0	0	0	0	0	0	0	0	0	0	0	0	0	0	0	0	0	0	0	0	0	0	0	0	0	0	0	0	T->A	0	0	0	0	0	0	0	0
yjm320_mito_RF1	389	0	0	0	0	0	0	0	0	0	0	0	0	0	0	0	0	0	0	0	0	0	0	0	0	0	0	0	0	0	0	0	0	0	0	0	0	0	0	0	0	0	0	0	0	0	0	0	0
yjm326_mito_RF1	389	0	0	0	0	0	0	0	0	0	0	0	0	0	0	0	0	0	0	0	0	0	0	0	0	0	0	0	0	0	0	0	0	0	0	0	0	0	0	0	0	0	0	0	0	0	0	0	0
yjm428_mito_RF1	389	0	0	0	0	0	0	0	0	0	0	0	0	0	0	0	0	0	0	0	0	0	0	0	0	0	0	0	0	0	0	0	0	0	0	0	0	0	0	0	0	0	0	0	0	0	0	0	0
yjm541_mito_RF1	389	0	0	0	0	0	0	0	0	0	0	0	0	0	0	0	0	0	0	0	0	0	0	0	0	0	0	0	0	0	0	0	0	0	0	0	0	0	0	0	0	0	0	0	0	0	0	0	0
yjm554_mito_RF1	389	0	0	0	0	0	0	0	0	0	0	0	0	0	0	0	0	0	0	0	0	0	0	0	0	0	0	0	0	0	0	0	0	0	0	0	0	0	0	0	0	0	0	0	0	0	0	0	0
yjm682_mito_RF1	389	0	0	0	0	0	0	0	0	0	0	0	0	0	0	0	0	0	0	0	0	0	0	0	0	0	0	0	0	0	0	0	0	0	0	0	0	0	0	0	0	0	0	0	0	0	0	0	0
yjm683_mito_RF1	389	0	0	0	0	0	0	0	0	0	0	0	0	0	0	0	0	0	0	0	0	0	0	0	0	0	0	0	0	0	0	0	0	0	0	0	0	0	0	0	0	0	0	0	0	0	0	0	0
yjm1385_mito_RF1	399	0	0	0	0	0	0	0	0	0	0	0	0	0	0	0	0	0	0	0	0	0	0	0	0	0	0	0	0	0	0	0	0	0	0	0	0	0	0	0	0	0	0	0	0	0	0	0	0
yjm1386_mito_RF1	426	0	0	T->A	T->A	C->T	A->G	0	T->C	T->A	0	0	18 Ins	0	0	0	0	0	0	0	0	G->A	G->A	T->A	T->A	0	0	A->T	A->G	G->A	T->A	0	A->T	G->A	0	0	0	0	A->T	A->G	T->A	A->G	0	0	0	0	A->T	A->T	G->A
yjm1273_mito_RF1	455	0	0	T->A	T->A	C->T	A->G	A->G	0	T->A	0	0	0	A->T	A->T	0	0	15 Ins	0	0	0	G->A	G->A	T->A	T->A	0	0	A->T	A->G	G->A	T->A	0	A->T	G->A	0	0	0	0	A->T	A->G	T->A	A->G	0	0	0	0	A->T	A->T	G->A
yjm1434_mito_RF1	455	0	0	T->A	T->A	C->T	A->G	A->G	0	T->A	0	0	0	A->T	A->T	0	0	15 Ins	0	0	0	G->A	G->A	T->A	T->A	0	0	A->T	A->G	G->A	T->A	0	A->T	G->A	0	0	0	0	A->T	A->G	T->A	A->G	0	0	0	0	A->T	A->T	G->A
yjm1400_mito_RF1	456	0	0	0	0	0	0	0	0	0	0	0	0	0	0	0	0	0	0	0	0	0	0	0	0	0	0	0	0	0	0	0	0	0	0	0	0	0	0	0	0	0	0	0	0	0	0	0	0
yjm1402_mito_RF1	456	0	0	T->A	T->A	C->T	A->G	A->G	0	T->A	0	0	0	A->T	A->T	0	0	15 Ins	0	0	A->G	G->A	0	T->A	0	0	0	0	A->G	0	T->A	0	A->T	G->A	0	0	0	0	A->T	A->G	T->A	A->G	0	0	0	0	A->T	A->T	G->A
yjm1479_mito_RF1	456	0	0	0	0	0	0	0	0	0	0	0	0	0	0	0	0	0	0	0	0	0	0	0	0	0	0	0	0	0	0	0	0	0	0	0	0	0	0	0	0	0	0	0	0	0	0	0	0
yjm1573_mito_RF1	456	0	0	T->A	T->A	C->T	A->G	A->G	0	T->A	0	0	0	A->T	A->T	0	0	15 Ins	0	0	A->G	G->A	0	T->A	0	0	0	0	A->G	0	T->A	0	A->T	G->A	0	0	0	0	A->T	A->G	T->A	A->G	0	0	0	0	A->T	A->T	G->A
yjm689_mito_RF1	456	0	0	0	0	0	0	0	0	0	0	0	0	0	0	0	0	0	0	0	0	0	0	0	0	0	0	0	0	0	0	0	0	0	0	0	0	0	0	0	T->A	0	0	0	0	0	0	0	0
yjm1190_mito_RF1	466	0	0	T->A	T->A	C->T	A->G	0	T->C	T->A	0	0	18 Ins	0	0	0	0	0	0	0	0	G->A	G->A	T->A	T->A	0	0	A->T	A->G	G->A	T->A	0	A->T	G->A	0	0	0	0	A->T	A->G	T->A	A->G	0	0	0	0	A->T	A->T	G->A
yjm1199_mito_RF1	466	0	0	T->A	T->A	C->T	A->G	0	T->C	T->A	0	0	18 Ins	0	0	0	0	0	0	0	0	G->A	G->A	T->A	T->A	0	0	A->T	A->G	G->A	T->A	0	A->T	G->A	0	0	0	0	A->T	A->G	T->A	A->G	0	0	0	0	A->T	A->T	G->A
yjm1202_mito_RF1	466	0	0	T->A	T->A	C->T	A->G	0	T->C	T->A	0	0	18 Ins	0	0	0	0	0	0	0	0	G->A	G->A	T->A	T->A	0	0	A->T	A->G	G->A	T->A	0	A->T	G->A	0	0	0	0	A->T	A->G	T->A	A->G	0	0	0	0	A->T	A->T	G->A
yjm1418_mito_RF1	467	0	0	T->A	T->A	C->T	A->G	0	T->C	T->A	0	0	18 Ins	0	0	0	0	0	0	0	0	G->A	G->A	T->A	T->A	0	0	A->T	A->G	G->A	T->A	0	A->T	G->A	0	0	0	0	A->T	A->G	T->A	A->G	0	0	0	0	A->T	A->T	G->A
yjm1304_mito_RF1	471	0	0	T->A	T->A	C->T	A->G	A->G	0	T->A	0	0	0	A->T	A->T	0	0	15 Ins	0	0	A->G	G->A	G->A	T->A	T->A	0	0	A->T	A->G	G->A	T->A	0	A->T	G->A	0	0	0	0	A->T	A->G	T->A	A->G	0	0	0	0	A->T	A->T	G->A
yjm1326_mito_RF1	471	0	0	T->A	T->A	C->T	A->G	A->G	0	T->A	0	0	0	A->T	A->T	0	0	15 Ins	0	0	A->G	G->A	G->A	T->A	T->A	0	0	A->T	A->G	G->A	T->A	0	A->T	G->A	0	0	0	0	A->T	A->G	T->A	A->G	0	0	0	0	A->T	A->T	G->A
yjm1419_mito_RF1	471	0	0	T->A	T->A	C->T	A->G	A->G	0	T->A	0	0	0	A->T	A->T	0	0	15 Ins	0	0	0	G->A	G->A	T->A	T->A	0	0	A->T	A->G	0	T->A	0	A->T	G->A	0	0	0	0	A->T	A->G	T->A	A->G	0	0	0	0	A->T	A->T	G->A
yjm1443_mito_RF1	471	0	0	T->A	T->A	C->T	A->G	A->G	0	T->A	0	0	0	A->T	A->T	0	0	15 Ins	0	0	A->G	G->A	G->A	T->A	T->A	0	0	A->T	A->G	G->A	T->A	0	A->T	G->A	0	0	0	0	A->T	A->G	T->A	A->G	0	0	0	0	A->T	A->T	G->A
yjm1444_mito_RF1	471	0	0	T->A	T->A	C->T	A->G	0	T->C	T->A	0	0	0	A->T	A->T	0	0	15 Ins	0	0	A->G	G->A	G->A	T->A	T->A	0	0	A->T	A->G	G->A	T->A	0	A->T	G->A	0	0	0	0	A->T	A->G	T->A	A->G	0	0	0	0	A->T	A->T	G->A
yjm1527_mito_RF1	471	0	0	T->A	T->A	C->T	A->G	0	T->C	T->A	0	0	0	A->T	A->T	0	0	15 Ins	0	0	A->G	G->A	G->A	T->A	T->A	0	0	A->T	A->G	G->A	T->A	0	A->T	G->A	0	0	0	0	A->T	A->G	T->A	A->G	0	0	0	0	A->T	A->T	G->A
yjm450_mito_RF1	471	0	0	T->A	T->A	C->T	A->G	0	T->C	T->A	0	0	0	A->T	A->T	0	0	15 Ins	0	0	A->G	G->A	G->A	T->A	T->A	0	0	A->T	A->G	G->A	T->A	0	A->T	G->A	0	0	0	0	A->T	A->G	T->A	A->G	0	0	0	0	A->T	A->T	G->A
yjm451_mito_RF1	471	0	0	T->A	T->A	C->T	A->G	0	T->C	T->A	0	0	0	A->T	A->T	0	0	15 Ins	0	0	A->G	G->A	G->A	T->A	T->A	0	0	A->T	A->G	G->A	T->A	0	A->T	G->A	0	0	0	0	A->T	A->G	T->A	A->G	0	0	0	0	A->T	A->T	G->A
yjm456_mito_RF1	471	0	0	T->A	T->A	C->T	A->G	A->G	0	T->A	0	0	0	A->T	A->T	0	0	15 Ins	0	0	A->G	G->A	G->A	T->A	T->A	0	0	A->T	A->G	G->A	T->A	0	A->T	G->A	0	0	0	0	A->T	A->G	T->A	A->G	0	0	0	0	A->T	A->T	G->A
yjm555_mito_RF1	471	0	0	T->A	T->A	C->T	A->G	A->G	0	T->A	0	0	0	A->T	A->T	0	0	15 Ins	0	0	A->G	G->A	G->A	T->A	T->A	0	0	A->T	A->G	G->A	T->A	0	A->T	G->A	0	0	0	0	A->T	A->G	T->A	A->G	0	0	0	0	A->T	A->T	G->A
yjm693_mito_RF1	471	0	0	T->A	T->A	C->T	A->G	0	T->C	T->A	0	0	0	A->T	A->T	0	0	15 Ins	0	0	A->G	G->A	G->A	T->A	T->A	0	0	A->T	A->G	G->A	T->A	0	A->T	G->A	0	0	0	0	A->T	A->G	T->A	A->G	0	0	0	0	A->T	A->T	G->A
yjm789_rf1	471	0	0	T->A	T->A	C->T	A->G	A->G	0	T->A	0	0	0	A->T	A->T	0	0	15 Ins	0	0	A->G	G->A	G->A	T->A	T->A	0	0	A->T	A->G	G->A	T->A	0	A->T	G->A	0	0	0	0	A->T	A->G	T->A	A->G	0	0	0	0	A->T	A->T	G->A
s288c_rf1_cds	472	0	0	0	0	0	0	0	0	0	0	0	0	0	0	0	0	0	0	0	0	0	0	0	0	0	0	0	0	0	0	0	0	0	0	0	0	0	0	0	0	0	0	0	0	0	0	0	0
sk1_rf1	472	0	0	0	0	0	0	0	0	0	0	0	0	0	0	0	0	0	0	0	0	0	0	0	0	0	0	0	0	0	0	0	0	0	0	0	0	0	0	0	0	0	0	0	0	0	0	0	0
yjm1208_mito_RF1	472	0	0	T->A	T->A	C->T	A->G	A->G	0	T->A	0	0	0	A->T	A->T	0	0	15 Ins	0	0	A->G	G->A	0	T->A	0	0	0	0	A->G	0	T->A	0	A->T	G->A	0	0	0	0	A->T	A->G	T->A	A->G	0	0	0	0	A->T	A->T	G->A
yjm1242_mito_RF1	472	0	0	0	0	0	0	0	0	0	0	0	0	0	0	0	0	0	0	0	0	0	0	0	0	0	0	0	0	0	0	0	0	0	0	0	0	0	0	0	0	0	0	0	0	0	0	0	0
yjm1248_mito_RF1	472	0	0	0	0	0	0	0	0	0	0	0	0	0	0	0	0	0	0	0	0	0	0	0	0	0	0	0	0	0	0	0	0	0	0	0	0	0	0	0	0	0	0	0	0	0	0	0	0
yjm1383_mito_RF1	472	0	0	T->A	T->A	C->T	A->G	0	T->C	T->A	0	0	18 Ins	0	0	0	0	0	0	0	0	G->A	G->A	T->A	T->A	0	0	A->T	A->G	G->A	T->A	0	A->T	G->A	0	0	0	0	A->T	A->G	T->A	A->G	0	0	0	0	A->T	A->T	G->A
yjm1415_mito_RF1	472	0	0	T->A	T->A	C->T	A->G	A->G	0	T->A	0	0	0	A->T	A->T	0	0	15 Ins	0	0	A->G	G->A	0	T->A	0	0	0	0	A->G	0	T->A	0	A->T	G->A	0	0	0	0	A->T	A->G	T->A	A->G	0	0	0	0	A->T	A->T	G->A
yjm1433_mito_RF1	472	0	0	T->A	T->A	C->T	A->G	A->G	0	T->A	0	0	0	A->T	A->T	0	0	15 Ins	0	0	A->G	G->A	0	T->A	0	0	0	0	A->G	0	T->A	0	A->T	G->A	0	0	0	0	A->T	A->G	T->A	A->G	0	0	0	0	A->T	A->T	G->A
yjm1439_mito_RF1	472	0	0	0	0	0	0	0	0	0	0	0	0	0	0	0	0	0	0	0	0	0	0	0	0	0	0	0	0	0	0	0	0	0	0	0	0	0	0	0	0	0	0	0	0	0	0	0	0
yjm1450_mito_RF1	472	0	0	T->A	T->A	C->T	A->G	0	T->C	T->A	0	0	18 Ins	0	0	0	0	0	0	0	A->G	G->A	G->A	T->A	T->A	0	0	A->T	A->G	0	T->A	0	A->T	G->A	0	0	0	0	A->T	A->G	T->A	A->G	0	0	0	0	A->T	A->T	G->A
yjm1463_mito_RF1	472	0	0	0	0	0	0	0	0	0	0	0	0	0	0	0	0	0	0	0	0	0	0	0	0	0	0	0	0	0	0	0	0	0	0	0	0	0	0	0	0	0	0	0	0	0	0	0	0
yjm1477_mito_RF1	472	0	0	0	0	0	0	0	0	0	0	0	0	0	0	0	0	0	0	0	0	0	0	0	0	0	0	0	0	0	0	0	0	0	0	0	0	0	0	0	0	0	0	0	0	0	0	0	0
yjm1478_mito_RF1	472	0	0	0	0	0	0	0	0	0	0	0	0	0	0	0	0	0	0	0	0	0	0	0	0	0	0	0	0	0	0	0	0	0	0	0	0	0	0	0	0	0	0	0	0	0	0	0	0
yjm1549_mito_RF1	472	0	0	T->A	T->A	C->T	A->G	0	T->C	T->A	0	0	18 Ins	0	0	0	0	0	0	0	0	G->A	G->A	T->A	T->A	0	0	A->T	A->G	G->A	T->A	0	A->T	G->A	0	0	0	0	A->T	A->G	T->A	A->G	0	0	0	0	A->T	A->T	G->A
yjm1574_mito_RF1	472	0	0	T->A	T->A	C->T	A->G	A->G	0	T->A	0	0	0	A->T	A->T	0	0	15 Ins	0	0	A->G	G->A	0	T->A	0	0	0	0	A->G	0	T->A	0	A->T	G->A	0	0	0	0	A->T	A->G	T->A	A->G	0	0	0	0	A->T	A->T	G->A
yjm1615_mito_RF1	472	0	0	T->A	T->A	C->T	A->G	A->G	0	T->A	0	0	0	A->T	A->T	0	0	15 Ins	0	0	A->G	G->A	0	T->A	0	0	0	0	A->G	0	T->A	0	A->T	G->A	0	0	0	0	A->T	A->G	T->A	A->G	0	0	0	0	A->T	A->T	G->A
yjm193_mito_RF1	472	0	0	0	0	0	0	0	0	0	0	0	0	0	0	0	0	0	0	0	0	0	0	0	0	0	0	0	0	0	0	0	0	0	0	0	0	0	0	0	0	0	0	0	0	0	0	0	0
yjm270_mito_RF1	472	0	0	T->A	T->A	C->T	A->G	A->G	0	T->A	0	0	0	A->T	A->T	0	0	15 Ins	0	0	A->G	G->A	0	T->A	0	0	0	0	A->G	0	T->A	0	A->T	G->A	0	0	0	0	A->T	A->G	T->A	A->G	0	0	0	0	A->T	A->T	G->A
yjm271_mito_RF1	472	0	0	0	0	0	0	0	0	0	0	0	0	0	0	0	0	0	0	0	0	0	0	0	0	0	0	0	0	0	0	0	0	0	0	0	0	0	0	0	0	0	0	0	0	0	0	0	0
yjm470_mito_RF1	472	0	0	T->A	T->A	C->T	A->G	A->G	0	T->A	0	0	0	A->T	A->T	0	0	15 Ins	0	0	A->G	G->A	0	T->A	0	0	0	0	A->G	0	T->A	0	A->T	G->A	0	0	0	0	A->T	A->G	T->A	A->G	0	0	0	0	A->T	A->T	G->A
yjm681_mito_RF1	472	0	0	T->A	T->A	C->T	A->G	0	T->C	T->A	0	0	18 Ins	0	0	0	0	0	0	0	A->G	G->A	G->A	T->A	T->A	0	0	A->T	A->G	0	T->A	0	A->T	G->A	0	0	0	0	A->T	A->G	T->A	A->G	0	0	0	0	A->T	A->T	G->A
yjm1388_mito_RF1	481	0	0	T->A	T->A	C->T	A->G	A->G	0	T->A	0	0	0	A->T	A->T	0	0	15 Ins	0	0	A->G	G->A	G->A	T->A	T->A	0	0	A->T	A->G	G->A	T->A	0	A->T	G->A	0	0	0	0	A->T	A->G	T->A	A->G	0	0	0	0	A->T	A->T	G->A
yjm1389_mito_RF1	481	0	0	T->A	T->A	C->T	A->G	A->G	0	T->A	0	0	0	A->T	A->T	0	0	15 Ins	0	0	A->G	G->A	G->A	T->A	T->A	0	0	A->T	A->G	G->A	T->A	0	A->T	G->A	0	0	0	0	A->T	A->G	T->A	A->G	0	0	0	0	A->T	A->T	G->A
yjm1592_mito_RF1	481	0	0	T->A	T->A	C->T	A->G	A->G	0	T->A	0	0	0	A->T	A->T	0	0	15 Ins	0	0	A->G	G->A	G->A	T->A	T->A	0	0	A->T	A->G	G->A	T->A	0	A->T	G->A	0	0	0	0	A->T	A->G	T->A	A->G	0	0	0	0	A->T	A->T	G->A
yjm1399_mito_RF1	484	0	0	T->C	0	C->T	0	A->G	0	T->A	0	0	18 Ins	0	0	0	0	0	A->C	A->T	A->G	G->A	0	T->A	0	A->T	T->A	0	0	0	0	0	0	G->A	0	T->A	0	0	A->T	A->G	T->G	A->G	0	0	0	6 Ins	0	A->T	G->A
[truncated: 489 more columns]

[truncated: 5 more sheets: var1, oli1, atp8, cox1, cob]
